1 **RNA-sequencing manifests the intrinsic role of MAPKAPK2 in facilitating molecular**  
2 **crosstalk during HNSCC pathogenesis**

3 Sourabh Soni<sup>1,3,#</sup>, Prince Anand<sup>1,3,+</sup>, Mohit Kumar Swarnkar<sup>2</sup>, Vikram Patial<sup>1,3</sup>, Narendra V.  
4 Tirpude<sup>1,3</sup>, Yogendra S. Padwad<sup>1,3,\*</sup>

5 \*Corresponding author: Yogendra S. Padwad

6 Address: Pharmacology and Toxicology Lab, Dietetics and Nutrition Technology Division,  
7 CSIR-Institute of Himalayan Bioresource Technology, Palampur, Himachal Pradesh-176  
8 061, India. Tel.: +91 1894 233339 Ext. 473. Fax: +91 1894 230433

9 E-mail address: [yogendra@ihbt.res.in](mailto:yogendra@ihbt.res.in)

10

11 **Authors' information**

12 <sup>1</sup>Pharmacology and Toxicology Laboratory, CSIR-Institute of Himalayan Bioresource  
13 Technology (CSIR-IHBT), Palampur-176061, India

14 <sup>2</sup>Biotechnology Division, CSIR-Institute of Himalayan Bioresource Technology (CSIR-  
15 IHBT), Palampur-176061, India

16 <sup>3</sup>Academy of Scientific and Innovative Research (AcSIR), Ghaziabad-201002, India.

17

18 Sourabh Soni: [sourabhsoniplp@gmail.com](mailto:sourabhsoniplp@gmail.com)

19 Prince Anand: [princeanandsaharsa4u@gmail.com](mailto:princeanandsaharsa4u@gmail.com)

20 Mohit Kumar Swarnkar: [mohitks@ihbt.res.in](mailto:mohitks@ihbt.res.in)

21 Vikram Patial: [vikrampatial@ihbt.res.in](mailto:vikrampatial@ihbt.res.in)

22 Narendra V. Tirpude: [narendra@ihbt.res.in](mailto:narendra@ihbt.res.in)

23 \*Yogendra S. Padwad: [yogendra@ihbt.res.in](mailto:yogendra@ihbt.res.in)

24

25 <sup>#</sup>Current address: Division of Pulmonary and Critical Care Medicine, Brigham and Women's  
26 Hospital, Department of Medicine, Harvard Medical School, Boston, MA 02115, USA.

27 Email: [ssoni4@bwh.harvard.edu](mailto:ssoni4@bwh.harvard.edu)

28

29 + Authors contributed equally to the manuscript.

30

31 **Abstract**

32 **Background:** Transcriptome profiling has been pivotal in better comprehending the  
33 convoluted biology of tumors including head and neck squamous cell carcinoma (HNSCC).  
34 Recently, growing evidence has implicated the role of mitogen-activated protein kinase-  
35 activated protein kinase-2 (MAPKAPK2 or MK2) in many human diseases including tumors.  
36 MK2 has been recently reported as a critical regulator of HNSCC that functions *via*  
37 modulating the transcript turnover of crucial genes involved in its pathogenesis.  
38 Comprehensive MK2-centric transcriptomic analyses could help the scientific community to  
39 delve deeper into MK2-pathway driven mechanisms of tumor progression, but such studies  
40 have not yet been reported. Consequently, to delineate the biological relevance of MK2 and  
41 its intricate crosstalk in the tumor milieu, an extensive transcriptome analysis of HNSCC was  
42 conceptualized and effectuated with MK2 at the nexus.

43 **Methods:** In the current study, comprehensive next-generation sequencing-based  
44 transcriptome profiling was accomplished to ascertain global patterns of mRNA expression  
45 profiles in both *in vitro* and *in vivo* models of the HNSCC microenvironment. The findings of  
46 the RNA-sequencing analysis were cross-validated *via* robust validation using nCounter gene  
47 expression assays, immunohistochemistry, and real-time quantitative polymerase chain  
48 reaction (RT-qPCR).

49 **Results:** Transcriptomic characterization followed by annotation and differential gene  
50 expression analyses identified certain MK2-regulated candidate genes constitutively involved  
51 in regulating HNSCC pathogenesis, and the biological significance of these genes was  
52 established by pathway enrichment analysis. Additionally, advanced gene expression assays  
53 through the nCounter system in conjunction with immunohistochemical analysis validated the  
54 transcriptome profiling outcomes quite robustly. Furthermore, the results obtained from  
55 immunohistochemistry and transcript stability analysis indicated the crucial role of MK2 in  
56 the modulation of the expression pattern of these genes in HNSCC tumors and cells.

57 **Conclusions:** Conclusively, the findings have paved the way toward the identification of new  
58 effective tumor markers and potential molecular targets for HNSCC management. The results  
59 have accentuated the importance of certain differentially expressed MK2-regulated genes that  
60 are constitutively involved in HNSCC pathogenesis to potentially serve as putative  
61 candidates for future endeavors pertaining to diagnosis and therapeutic interventions for  
62 HNSCC.

### 63 **Keywords**

64 Head and neck squamous cell carcinoma, Transcriptome, Mitogen-activated protein kinase-  
65 activated protein kinase-2, Differentially expressed genes, Pathogenesis, RNA-sequencing.

### 66 **1. Background**

67 Multifaceted regulatory networks tend to connect genes within a myriad of cellular processes.  
68 A plethora of genes are involved in fundamental biological processes such as cell  
69 differentiation, growth, and programmed cell death, and their role in many diseases is  
70 presently known [1]. However, the apprehension of their roles at a global level is still  
71 incomplete. Gene transcription and regulatory networks in conjunction with new genome-  
72 wide approaches have garnered huge attention in the pretext of gene regulation. Nevertheless,  
73 post-transcriptional mechanisms such as transcript stability are also highly crucial and require  
74 intricate regulation *via* a multitude of intracellular signaling pathways [2, 3]. In particular, the  
75 modulation of transcript stability through phosphorylation-mediated regulation of RNA-  
76 binding proteins (RBPs) by mitogen-activated protein kinases (MAPKs) has been a topic of  
77 great interest [2, 3, 4, 5].

78 Head and neck squamous cell carcinoma (HNSCC) having an incidence rate of  
79 ~600,000 cases yearly, is the seventh most common cancer worldwide and one of the most  
80 lethal cancers with an overall mortality rate of 40-50% [6,7]. HNSCCs are classified either  
81 histologically [8] or *via* the analysis of global transcription that employs etiology-specific

82 profiles [9, 10]. However, when these parameters were used for patient clustering, specific  
83 differences were observed in the clinical behavior of patients as well as their response to  
84 therapy [11]. The survival rates of HNSCC patients have not improved much, hence, HNSCC  
85 has been rightly termed a malignant tumor with a low survival rate [12]. Consequently,  
86 augmented mechanistic insight into the molecular basis of HNSCC pathogenesis is urgently  
87 required to help in the early diagnosis and development of effective therapeutics aimed at  
88 improved clinical outcomes [13].

89         The role of differentially expressed genes (DEGs) and endogenous RNA networks in  
90 HNSCC is not fully deciphered. Past reports on genome and transcriptome studies in various  
91 human tumors have revealed aberrant regulatory programs, driver mutations, and disease  
92 subtypes [14]. The cancer genome study is a valuable tool for classification, diagnosis, and  
93 prognosis in HNSCC. There have been many past reports pertaining to genomic alterations in  
94 HNSCC [15, 16]. Recently, The Cancer Genome Atlas (TCGA) has led to a global analysis  
95 of major molecular changes, a comprehensive landscape of transcriptomic alterations and  
96 pathogenesis-linked signaling pathways in tumors, thus, contributing to the identification of  
97 novel prognostic biomarkers or specific anticancer molecular targets [17, 18]. However, there  
98 is still a need for extensive research insights to decipher the prognostic value attributed to  
99 these genomic alterations in tumors such as HNSCC. A variety of biomarkers such as MAPK  
100 phosphatase-1 (MKP-1), p16, p27, p53, tumor necrosis factor- $\alpha$  (TNF- $\alpha$ ), and vascular  
101 endothelial growth factor (VEGF) have been shown to be linked with HNSCC [5, 19], but  
102 they have not been proven to be sufficient in accurately defining HNSCC pathogenesis.  
103 Single biomarkers have generally proven insufficient in the prediction of therapeutic response  
104 thereby necessitating research on combinatorial markers through high-resolution “omics”  
105 profiling [20]. Consequently, the identification of reliable molecular biomarkers associated  
106 with HNSCC using omics-based analyses is needed to develop novel potential diagnostic and  
107 therapeutic targets [21].

108           Recently, the mRNA regulatory networks involved in tumor progression have  
109    garnered huge research interest with recent reports showing the role of these intricate  
110    networks in tumorigenesis [22]. However, research endeavors in this area are quite limited,  
111    thereby pointing to a pertinent need for comprehensive analyses of mRNAs and regulatory  
112    networks and their involvement in tumorigenesis. Next-generation sequencing (NGS) has  
113    rapidly evolved as an important tool for epigenomic, genomic, and transcriptomic profiling of  
114    cancers. Technological advances in mining and deciphering vast transcriptomic data have  
115    enabled us to better comprehend the complexity of various tumors and have streamlined  
116    efforts to discover novel biomarkers and therapeutic targets aimed at tumor management  
117    [23]. In a recent study, our team elucidated the role of mitogen-activated protein kinase-  
118    activated protein kinase-2 (MAPKAPK2 or MK2) in HNSCC pathogenesis using clinical  
119    tissue samples, cell lines, and heterotopic xenograft mouse model [5]. MK2 was found to be  
120    critically important in regulating HNSCC *via* modulating the transcript stability of crucial  
121    pathogenesis-related genes. It was also established that MK2-knockdown attenuated tumor  
122    progression in a xenograft mouse model [5]. Thereupon, to delve deeper into the mechanistic  
123    role of MK2 and to decipher the molecular markers responsible for MK2-mediated changes  
124    in HNSCC pathogenesis, a comprehensive transcriptome profiling was performed and  
125    evaluated.

126           In the present study, the global mRNA expression profiles in HNSCC experimental  
127    model sets were evaluated using transcriptome analysis on the NovaSeq 6000 system  
128    (Illumina Inc., USA). The *in vitro* HNSCC cells, CAL27-MK2<sub>WT</sub> (wild-type) and CAL27-  
129    MK2<sub>KD</sub> (knockdown), cultured in normoxic or the tumor microenvironment mimicking  
130    hypoxic conditions comprised the first set. The *in vivo* heterotopic HNSCC xenograft bearing  
131    tumors from CAL27-MK2<sub>WT</sub> and CAL27-MK2<sub>KD</sub> cells in immunocompromised mice (as  
132    described previously [5]) formed the second set. Comprehensive transcriptome analysis in the  
133    experimental models highlighted certain specific MK2-mediated DEGs and regulatory

134 networks that play an integral role in HNSCC pathogenesis. Furthermore, specific gene  
135 expression assays on the nCounter system (NanoString Technologies, Inc., USA) were  
136 carried out to obtain a sensitive, highly multiplexed, and reliable detection of the defined  
137 mRNA targets based on the initial transcriptome profiling. The assays yielded highly precise  
138 and reproducible data that confirmed the transcriptome findings and yielded three MK2-  
139 regulated candidate genes (IGFBP2, MUC4, and PRKAR2B) intrinsically involved in  
140 HNSCC pathogenesis. Finally, cross-validation of the nCounter assay results in an *in vitro*  
141 setting, using immunohistochemistry (IHC) and mRNA transcript stability experiments  
142 through real time-quantitative polymerase chain reaction (RT-qPCR) was performed and it  
143 was found that these MK2-downstream genes showed dependence on MK2 for their  
144 expression and regulation in HNSCC tumors and cells (Figure 1). The findings corroborated  
145 recently published results, hence, ascertaining a crucial role of MK2 in HNSCC pathogenesis  
146 by means of transcript stability regulation [5]. These outcomes could potentially aid in the  
147 discovery of novel molecular markers for HNSCC management and diagnostic benefits.

## 148 **2. Materials and Methods**

### 149 **2.1 Cell Culture**

150 *Homo sapiens* tongue squamous cell carcinoma cell line CAL27 (CRL-2095<sup>TM</sup>, ATCC, USA)  
151 was grown in specific media supplemented with 10% fetal bovine serum and 1% antibiotic-  
152 antimycotic (Gibco, USA). The cells were cultured under normal conditions (37°C, 5% CO<sub>2</sub>  
153 incubator with 95% humidity) and were free from any kind of contamination. Furthermore,  
154 MK2-specific short hairpin RNA-green fluorescent protein (shRNA-GFP) constructs were  
155 used to stably knockdown MK2 in cultured CAL27 cells to generate CAL27-MK2<sub>KD</sub> cells as  
156 previously described [5]. For hypoxia exposure, the cultured cells were seeded into Petri  
157 plates and incubated in 0.5% O<sub>2</sub> at 37°C in a hypoxia chamber for 48 hours (Bactrox, Shel-  
158 Lab, USA).

## 159 **2.2 Xenograft mice model generation**

160 To mimic the human tumor microenvironment, a biologically relevant heterotopic xenograft  
161 model of HNSCC was developed in non-obese diabetic/severe combined immunodeficient  
162 (NOD/SCID) mice. The immunocompromised mice were randomly assigned into control  
163 (CAL27-MK2<sub>WT</sub>) and experimental (CAL27-MK2<sub>KD</sub>) groups based on the specific cell type  
164 injected [5]. Briefly, for xenograft generation, 1x10<sup>6</sup> cultured cells suspended in 100 µl of 1x  
165 phosphate buffered saline were injected subcutaneously into the right flanks of mice. Seven  
166 weeks post-graft inoculation, the mice were euthanized by CO<sub>2</sub> asphyxiation; tumors were  
167 aseptically excised, weighed, and used for tissue embedding or RNA isolation.

## 168 **2.3 RNA extraction and sample preparation for RNA-sequencing (RNA-seq)**

169 CAL27-MK2<sub>WT</sub> and CAL27-MK2<sub>KD</sub> cells cultured in normoxia/hypoxia and tumors resected  
170 from the xenografted mice were employed for isolation of total cellular RNA using the  
171 RNeasy Mini kit (Qiagen, Germany) following the manufacturer's recommended protocol  
172 (sample details are provided in Table 1). Consequently, the qualitative and quantitative  
173 assessment of all the RNA samples was performed using a NanoDrop 2000C  
174 spectrophotometer (Thermo Fisher Scientific, USA) and Bioanalyzer (Agilent 2100, Agilent  
175 Technologies, USA) (Figure S1). The RNA integrity number (RIN) value >5 was used as an  
176 exclusion criterion for this study. RNA samples having RIN>5 was used for cDNA library  
177 preparation. For each sample, RNA was isolated from at least three biological replicates for  
178 library construction and further experimentation.

## 179 **2.4 cDNA library preparation and sequencing**

180 Total RNA (5 µg) from each sample was used to isolate poly-A mRNA followed by  
181 preparation of cDNA library using the TruSeq mRNA sample preparation kit v2 (Illumina  
182 Inc.). Each sample was tagged with a unique TruSeq index tag to prepare multiplexed  
183 libraries. Six paired-end adapters with unique six base index sequences, permitting accurate

184 differentiation among samples, were used for the library preparation. The quantification of  
185 prepared libraries was performed on a Qubit fluorometer using a Qubit dsDNA BR assay kit  
186 (Life Technologies, USA), while the size and purity of the libraries were examined on a  
187 Bioanalyzer DNA 1000 series II chip (Agilent Technologies). The flow chart of the  
188 sequential steps involved in the TruSeq library preparation is given in Figure S2. The  
189 libraries (4 from the cell line model and 2 from the animal model) had an average insert size  
190 of 210 base pairs (bp) and were pooled by taking 10  $\mu$ l from each library. The final pool was  
191 loaded in one lane of an S2 flow cell using the NovaSeq XP protocol (Illumina Inc.) (Figure  
192 S3) [24]. Cluster amplification and generation of sequencing data were performed on the  
193 NovaSeq 6000 system (Illumina Inc.) using 2x100 paired-end cycles. Raw data quality  
194 control was accomplished using the NGSQC tool kit v2.3 with default parameters [25].

## 195 **2.5 Reference-based assembly and homology search**

196 The raw FASTQ files with low-quality reads of sequencing data were filtered to obtain high-  
197 quality filtered data that were aligned to the reference genome (genome reference consortium  
198 human build 38 patch release 12, GRCh38.p12). The Kallisto pipeline was used for alignment  
199 and identification of transcript coding regions followed by quantitation and annotation using  
200 default parameters [26][27]. Furthermore, the removal of multi-mapped reads was performed,  
201 and the filtered data were finally converted to read counts for annotated genes. Figure 2a is a  
202 flowchart representation of the various steps involved in the sequencing data analyses.

## 203 **2.6 Annotation, differential gene expression, and pathway analyses**

204 Expression of the transcripts in the samples was analyzed based on their fragments per  
205 kilobase of transcript per million mapped (FPKM) values [26]. Transcripts were given a score  
206 for their expression by the Cufflinks-based maximum likelihood method and values with  
207  $FPKM \geq 0.1$  were considered significant for downstream analysis. Although  $FPKM \geq 0.1$  cut-  
208 off indicates a low level of transcript expression, this value was essentially used to attain a



209 high enough threshold for the number of transcripts in the analyzed datasets considering the  
210 downstream filter-specific analyses performed in this study. Transcripts uniquely expressed  
211 in each sample were considered specific and were analyzed separately. The false discovery  
212 rate (FDR) was employed to correct the statistical significance of the p-values for multiple  
213 tests. DEGs in the analyzed datasets were identified *via* the DESeq analysis pipeline [27]  
214 using a fold change (FC) threshold of absolute  $\log_2 FC \geq 2$  and a statistically significant  
215 Student's t-test p-value threshold adjusted for  $FDR < 0.001$ . Consequently, transcripts with  
216  $FC < -2$  were considered downregulated while those with  $FC > 2$  were considered upregulated.  
217 Statistically, significant enriched functional classes with a p-value adjusted for  $FDR > 0.05$ ,  
218 derived using the hypergeometric distribution test corresponding to the DEGs, were  
219 determined using Student's t-test with the Benjamini Hochberg FDR test.

220 Unsupervised hierarchical clustering of DEGs was performed using Cluster 3.0 and  
221 visualized using Java TreeView [28, 29]. Gene ontology (GO) and pathways that harbor  
222 expressed transcripts were identified using the DAVID functional annotation tool  
223 (<http://david.abcc.ncifcrf.gov/home.jsp>) [28, 29, 30] (Figure 2a). For the DEGs, heat maps  
224 and volcano plots were generated using the 'gplots' and 'heat map' packages. GO and Kyoto  
225 Encyclopedia of Genes and Genomes (KEGG) pathway analyses were performed for the  
226 assembled transcripts with reference to the UniProt database. Data of the total DEGs  
227 (upregulated and downregulated) were explored further using Cytoscape v3.5.0  
228 (<http://www.cytoscape.org/>) to better understand the gene regulatory networks and for  
229 mapping of the results [31]. In figures depicting the gene regulatory networks, the gene  
230 nodes/circles are sized according to their p-values and colored according to their FC where  
231 red shows upregulation, green depicts downregulation, and yellow displays baseline  
232 expression; processes are shown in rectangular boxes and colored in blue.

## 233 **2.7 The nCounter gene expression assays for primary validation**

234 To validate the leads obtained from the transcriptomic profiling, custom-designed molecular  
235 barcodes (NanoString Technologies, Inc.) were utilized for single-molecule imaging, thereby  
236 making it possible to detect and count hundreds of different transcripts in one reaction  
237 (Figure 1 and S4). RNA quality was assessed using the Agilent 2100 Bioanalyzer (Agilent  
238 Technologies) (Figure 1 and S1). Gene expression was analyzed on the nCounter system  
239 (NanoString Technologies, Inc.) following the manufacturer's recommendations. Briefly, the  
240 custom synthesized probes were hybridized overnight to the target RNA followed by washing  
241 away of the excess probes, immobilization of the CodeSet/RNA complexes in the nCounter  
242 cartridge, and finally data collection on the nCounter system (Figure 1 and S4). The gene  
243 expression levels were measured in triplicate for total RNA from the cell line and xenografted  
244 tumor samples, normalized to the four housekeeping genes (HKGs), and analyzed using  
245 nSolver software (NanoString Technologies, Inc.). Each nCounter assay contained synthetic  
246 spike-in controls in the preparatory mix to allow correction of the sample-to-sample variation  
247 arising due to common experimental errors such as differences in the amount of input  
248 transcripts or reagents [32]. The counts were normalized to the positive controls and averaged  
249 for the samples of each mRNA type. Normalization involved spiked-in positive and negative  
250 control probes for background correction in addition to the 4 HKGs. Data analyses were  
251 performed on the nSolver 3.0 analysis software (NanoString Technologies, Inc.).

## 252 **2.8 Immunohistochemical analysis for secondary validation**

253 The levels of expression and activation status of specific proteins were analyzed using IHC in  
254 the tumor sections from the *in vivo* xenograft model to validate the findings of the  
255 transcriptomic and the nCounter gene expression analysis. The animal study was approved by  
256 the Institutional Animal Ethics Committee (IAEC) of CSIR-IHBT, Palampur, India  
257 (Approval No. IAEC/IHBT-3/Mar 2017). IHC was performed according to the previously  
258 reported protocol [5]. Briefly, 5  $\mu$ m thin sections fixed on poly-l-lysine coated slides were

259 deparaffinized and rehydrated. Antigen retrieval was performed using sodium citrate buffer  
260 (pH 6.0) followed by quenching of endogenous peroxidases using BLOXALL™ blocking  
261 solution (Vector Laboratories, Inc., USA). Furthermore, incubation of the sections with 2.5%  
262 normal horse serum blocked the exposed sites. Sections were then incubated with  
263 appropriately diluted specific primary antibody (Table ST1) overnight at 4°C followed by  
264 horseradish peroxidase-conjugated secondary antibody for 1 hour at room temperature. The  
265 rinsed sections were then incubated with 3,3'-diaminobenzidine substrate and Mayer's  
266 hematoxylin served as a counterstain. Five field views were obtained from each section for  
267 the designated antibodies and used for quantitative analysis of protein expression.

## 268 **2.9 Gene expression analysis and MK2-regulated transcript stability**

269 To determine the role of MK2 in regulating transcript stability, the expression levels of  
270 selected genes and the stability of their transcripts were assessed in the presence/absence of  
271 MK2 using RT-qPCR in CAL27 cells. shRNA constructs were used to generate CAL27-  
272 MK2<sub>KD</sub> cells as previously reported [5]. MK2-knockdown was confirmed using western  
273 blotting (WB), following which CAL27-MK2<sub>WT</sub> and CAL27-MK2<sub>KD</sub> cells were treated with  
274 1 μM actinomycin-D (Act-D) to inhibit transcription. Total RNA was isolated at 6 time  
275 points (0, 0.5, 1, 2, 4, and 8 hours) using the RNeasy Mini kit (Qiagen) according to the  
276 manufacturer's recommended protocol. The purity of the isolated RNA was determined using  
277 a NanoDrop 2000C spectrophotometer (Thermo Fisher Scientific) and the 260/280 ratios  
278 were found to be between 1.9 and 2.1. Further RT-qPCR was performed using a Verso 1-step  
279 RT-qPCR kit (Invitrogen, USA) as previously described [5]. GAPDH was used as an internal  
280 gene control and the difference in cycle threshold (Ct) was calculated following the  $2^{-\Delta\Delta Ct}$   
281 method. The relative fold change was calculated by comparing the CAL27-MK2<sub>KD</sub>  
282 (designated as shMix group, cells were treated with a combination of an equal amount of  
283 MK2 targeting shRNA complexes 1, 2, 3, and 4) at the 6 mentioned time points with CAL27-

284 MK2<sub>WT</sub> (designated as mock or scramble control group, cells were treated with scrambled  
285 shRNA). shRNA constructs and vector maps have been described previously [5].

## 286 **2.10 Statistical analysis and quantification**

287 All the experiments were conducted at least in triplicates unless mentioned otherwise. IHC  
288 staining intensity was observed and analyzed by an expert pathologist in a single-blinded  
289 fashion using a BX53 bright field microscope (Olympus Corporation, Japan). Quantification  
290 of protein expression for IHC and WB was performed using ImageJ software 1.8.0  
291 (<https://imagej.nih.gov/ij/>). The images were RGB stacked, and the color threshold was  
292 adjusted according to the expression of specific proteins in the tissue section. For  
293 quantification, the expression was presented as a composite score of the percent area of the  
294 total tissues using ImageJ software. The statistical/imaging parameters used for the various  
295 transcriptomic analyses have been detailed with their explanations in their respective sections  
296 in the manuscript. GraphPad Prism 7.0 software (GraphPad Software, Inc., USA) was used  
297 for the data analysis of IHC and RT-qPCR quantified datasets.

## 298 **3. Results**

### 299 **3.1 Qualitative assessment of the generated cDNA library followed by filtering and** 300 **assembly of reads depicted optimum alignment**

301 The quality assessment of the isolated total-RNA from the appropriate cells/tissues, as well as  
302 the cDNA library generated, was performed using a Bioanalyzer (Agilent 2100, Agilent  
303 Technologies). It was found that the RIN values of all the RNA samples and the cDNA  
304 library were >5 suggesting that they were of suitable quality for use in downstream  
305 experiments (Figure S1 and S3).

306 Deep sequencing of RNA obtained from the NovaSeq 6000 platform (Illumina Inc.)  
307 resulted in 349 million raw reads (~58.2 million raw reads per sample) with an average insert  
308 size of 210 bp. Figure S5 and S6 summarizes the quality check (QC) results of the

309 sequencing experiment. The raw FASTQ sequences were filtered using the NGSQC tool kit  
310 to obtain high-quality (HQ) reads based on the predefined parameters, generating 258 million  
311 filtered HQ reads (~43.1 million HQ reads per sample). This amounted to 74.1% of the total  
312 raw reads, implying that the obtained data were of good quality. A total of 25.7 gigabases of  
313 data were generated which enumerates the enormity and wide complexity of the human  
314 genome.

315 The HQ reads obtained were further examined in the downstream analyses and  
316 mapped over the human reference genome. The alignment performed by employing the  
317 Kallisto pipeline was optimum with 88.7% of the HQ reads on average being mapped to the  
318 human reference genome (Figure 2a and S6).

### 319 **3.2 Annotation and differential gene expression analyses revealed candidate genes**

320 The present study was conducted using two distinct experimental datasets as mentioned in  
321 Figure 1 and Table 1. Using the criteria of  $FPKM \geq 0.1$ , 62791 expressing transcripts on an  
322 average were identified per sample, which further represented thousands of genes. A-D  
323 datasets depict the *in vitro* HNSCC cell line samples while F vs E illustrates the *in vivo*  
324 xenograft dataset. As detailed in Figure 1 and Table 1, analyses of MK2<sub>KD</sub> vs MK2<sub>WT</sub> in  
325 normoxia and the tumor core emulating the hypoxic niche were performed to obtain a  
326 comprehensive picture of the changes in the global gene expression pattern. The differential  
327 gene expression in the analyzed datasets was evaluated and a large pool of the DEGs,  
328 precisely 1403 in B vs A, 924 in D vs C, 1360 in D vs B, 1456 in C vs A, and 984 in F vs E  
329 were found as assessed by the predefined cutoff values. Figure 2b represents the total number  
330 of upregulated ( $FC > 2$ ) and downregulated ( $FC < -2$ ) genes among all the DEGs in the  
331 analyzed datasets.

### 332 **3.3 Pathway enrichment analysis revealed the biological significance of the findings**

333 The multitude of DEGs in the transcriptome profiling datasets was implicated in hundreds of  
334 significant biologies/biological processes as summarized in Figure 2c. To gain further insight  
335 into the biological significance of the variations in gene expression and to attain a global  
336 picture of the molecular pathways possibly contributing to HNSCC pathogenesis, pathway  
337 enrichment analyses were performed using the KEGG database. The resultant integrated  
338 network analysis revealed the top biological processes enriched in the analyzed datasets. The  
339 top GO pathway analyses for the DEGs are depicted in Figure 2d. Notably, a significant  
340 percentage (~5%) of the total DEGs in the analyzed datasets belonged to the pathways  
341 involved in cancer progression (Figure 2d). The DEGs showing significant changes among  
342 various groups were then selected, followed by the generation of heat maps to assess the  
343 clustering of gene expression profiles among the analyzed datasets (Figure 2e). Figure 2f  
344 further depicts the distribution of all the transcripts on the two dimensions of  $-\log(P)$  and FC  
345 by way of volcano plots with differentially expressed transcripts highlighted in blue.

346 In the A-D datasets, the DEGs belonged to a multitude of biological processes thereby  
347 limiting the information that could be harnessed. Henceforth, to filter down the data to attain  
348 meaningful outcomes and fulfill the aim of extracting valuable leads, the 77  
349 elements/biological processes that were common in A-D datasets were selected using Venny  
350 2.1.0 (<http://bioinfogp.cnb.csic.es/tools/>) (Figure 2g). These processes belonged to the  
351 various categories listed in Table ST2. Based on this knowledge, the common genes in these  
352 77 biological processes were further filtered down using the same approach (Figure 2h).  
353 Consequently, 5 genes common in the A-D datasets were obtained namely death-associated  
354 protein 3 (DAP3), EH domain binding protein 1 (EHBP1), inositol hexakisphosphate kinase 2  
355 (IP6K2), runt related transcription factor 1 (RUNX1), and SMC5-SMC6 complex localization  
356 factor 2 (SLF2) as listed in Table ST3. It is worth mentioning here that these MK2-regulated  
357 genes portray essential roles in HNSCC pathogenesis [33, 34, 35, 36]. Hence, further

358 exploratory investigations of these putative molecular targets are deemed essential for  
359 elucidating their relevance in HNSCC management.

### 360 **3.4 Gene regulatory networks and pathways depicted the significance of the candidate** 361 **genes in HNSCC pathogenesis**

362 Gene regulatory networks for the 5 common genes in A-D datasets furnished a detailed  
363 overview of the various inter-network connections and the biological processes affected by  
364 them. Collectively, the results showed that DAP3 plays an intrinsic role in apoptosis and  
365 poly(A)-RNA binding while IP6K2 plays a role in ATP, nucleotide, and protein binding as  
366 confirmed in past reports [19, 32]. These genes showed differential regulation in *in-vitro*  
367 dataset (B vs A) hence, clearly signifying that MK2-knockdown, as well as the hypoxic  
368 tumor microenvironment, affects the genes and pathways *via* differential regulation, pointing  
369 to a central role of MK2 in transcriptional regulation of HNSCC. Interestingly, the *in-vitro*  
370 results published by our group recently [5] also pointed to the role of MK2 in modulating the  
371 transcript stability of MK2-regulated genes. Similarly, the xenograft dataset (F vs E)  
372 potentiated this finding (Figure 3a, 3b).

373 Furthermore, to retrieve the information pertaining to the MK2-regulated candidate  
374 genes intrinsic to HNSCC pathogenesis, the data were narrowed down to include only  
375 processes that were involved in tumor progression for further analysis. This filtering down  
376 the dataset to 16 cancer-specific biological processes that were common in the A-D datasets  
377 (listed in Table ST4). In these 16 processes only 2 genes, DAP3 and RUNX1, were found to  
378 be common based on the analysis performed using Venny 2.1.0 (Figure 2i and Table ST5).  
379 Collectively, these findings clearly indicated that DAP3 and RUNX1 were differentially  
380 expressed in the cell line-based datasets analyzed, hence, potentiating their intrinsic  
381 involvement in HNSCC pathogenesis and warranting further investigation. Notably, the 16  
382 processes were found to be clustered in 5 major biological pathways (Figure S7) including

383 apoptosis and transcription, thereby, clearly showing that MK2 portrays an intrinsic role in  
384 the hypoxic tumor microenvironment by regulating these processes, hence, substantiating the  
385 latest *in vitro* findings from our group [5].

386 Similarly, on comparing the mice bearing CAL27-MK2<sub>KD</sub> tumors with those bearing  
387 CAL27-MK2<sub>WT</sub> tumors (F vs E xenograft dataset), it was found that the DEGs were clustered  
388 in 14 biological processes relevant to tumor pathogenesis as listed in Table ST6. The genes  
389 involved in these biological processes were assessed and Figure 3b shows the gene regulatory  
390 network. This analysis provided certain MK2-regulated candidate genes, such as TRAF2 [34]  
391 (apoptosis); EPB41L1 [35] (cytoskeleton); FOXO3, H2AFY and YAP1 (transcriptional  
392 regulation) [36] [37] [38]; and DIDO1 (RNA binding) [39] which are involved in key cellular  
393 processes in the xenograft model (Figure 3b). These findings can be explored further to  
394 decipher the putative role of the potential candidate genes in HNSCC pathogenesis with an  
395 aim to define the probable therapeutic targets for HNSCC management.

### 396 **3.5 MK2 is the master of regulatory networks and functions by modulating transcript** 397 **stability**

398 The prime objective of this study was to gather comprehensive information regarding the  
399 various MK2-regulated DEGs and pathways that render essential roles in HNSCC  
400 pathogenesis in normoxic and tumor core mimicking hypoxic conditions. Thereupon, keeping  
401 MK2 at the nexus of further analyses, this study focused on elucidating the regulation of the  
402 MK2 pathway and its downstream targets in the analyzed datasets. MK2 was found to be  
403 involved in the regulation of major biological pathways as shown in Figure S7 and S8.  
404 Recent findings by our group have asserted that MK2 controls the transcript stability of  
405 critical genes involved in HNSCC pathogenesis *via* RBP-mediated regulation [5]. Hence, we  
406 further analyzed the transcriptomic data to decipher the role of MK2 in the regulation of  
407 mRNA stability. Interestingly, MK2 was found to accomplish this task through RBP-



408 mediated regulation with HuR (ELAVL1) and TTP (ZFP36) playing intrinsic roles (Figure  
409 4a), thus, clearly affirming the hypothesis and corroborating previous findings [5]. The levels  
410 of expression of these RBPs and hence regulation varied in the analyzed datasets, thereby,  
411 clearly suggesting that the tumor microenvironment, in association with the presence/absence  
412 of MK2, plays an important role in HNSCC pathogenesis.

413 Next, to attain a clear understanding of what was happening at the transcriptional  
414 level, the analysis was narrowed down by selecting specific genes of the MK2 pathway. The  
415 genes were selected by literature mining of past MK2-centric studies and included those that  
416 were analyzed in our recent study [5]. Interestingly, the genes selected for this analysis, viz.  
417 AUF1, CEBP $\delta$ , CUGBP1, HuR, MK2, MKP-1, p27, p38, TNF- $\alpha$ , TTP, and VEGF, have  
418 been previously shown to be involved in several key cellular processes [reviewed in [4].  
419 Elucidation of the MAPK signaling cluster in detail indicated that in the background of MK2-  
420 knockdown in normoxia (B vs A dataset), TNF- $\alpha$  and VEGF tended to show downregulation  
421 (Figure 4b), which is in complete consonance with previously published results. The analyzed  
422 genes were clustered into 6 major biological processes as shown for (F vs E xenograft  
423 dataset) in Figure 4c and Figure S8. Collectively, the results of the transcriptomic analysis  
424 corroborated very well with previous findings, thereby, robustly verifying the hypothesis that  
425 MK2 is the master regulator of the transcript stability of genes critical to HNSCC  
426 pathogenesis.

### 427 **3.6 3'-untranslated region (3'-UTR)-based filtering furnished information regarding** 428 **important MK2-regulated downstream target genes**

429 In the present study, we focused on the role of MK2 and MK2-regulated genes in HNSCC  
430 pathogenesis. It is well known that MK2 can potentially regulate the transcript stability of  
431 only those downstream targets that possess binding regions for RBPs in their 3'-UTRs [40].  
432 Hence, the transcriptomic analysis was narrowed down to only those DEGs that harbored

433 RBP-binding regions in their 3'-UTRs (Figure 5), an approach that has lately been the  
434 cornerstone of many 'omics' studies [41, 42, 43]. The DEGs were filtered based on the  
435 presence of adenylate-uridylate-rich elements (ARE)-regions in their 3'-UTRs where RBPs  
436 can potentially bind and modulate their function possibly *via* MK2-mediated regulation. To  
437 accomplish this task, the 3'-UTR regions of all the DEGs were fetched using Ensembl  
438 (<http://www.ensembl.org/>) [44]. Next, the domain sequences of RBPs were assessed using  
439 the catalog of inferred sequence binding preferences of the RBPs (CISBP-RNA) database  
440 [45]. Last, the transcripts that harbor RBP-specific regions in their 3'-UTRs were filtered out  
441 using the RBPmap v1.1 web tool (<http://rbpmap.technion.ac.il/>) (Figure 5a) [46]. Once the  
442 probable MK2-downstream targets were identified (based on the aforementioned approach),  
443 the data were reassessed focusing on the 16 previously selected cancer-specific pathways in  
444 the *in vitro* HNSCC cell line model (A-D datasets) (Table ST4). The top 2 upregulated and  
445 downregulated genes in this dataset were evaluated following 3'-UTR filtering which yielded  
446 34 putative MK2-regulated genes as listed in Table ST7 (Figure 5b). Similarly, the topmost  
447 upregulated and downregulated genes were analyzed in all the cancer-specific pathways for  
448 the *in vivo* heterotopic HNSCC xenograft dataset (F vs E dataset) which provided 48 MK2-  
449 regulated genes that are listed in Table ST8 (Figure 5c). Collectively, this 3'-UTR-specific  
450 filtering of the transcriptomic data brought into the limelight possible MK2-downstream  
451 target genes that could be integral in HNSCC pathogenesis. Furthermore, to cross-validate the  
452 findings of the transcriptomic profiling, these candidate genes along with the 5 common  
453 genes in the 77 common elements in A-D datasets (listed in Table ST3) were used for further  
454 *in vitro* validation. H2AFY was common in the transcriptomic analysis for both the cell line  
455 and xenograft analysis (Table ST7 and ST8). Resultingly, a total of 86 genes (Table ST9) (34  
456 MK2-regulated genes and 5 common genes for the A-D datasets, 48 MK2-regulated genes in  
457 the F vs E dataset, and the common gene, H2AFY, were counted once) were selected for  
458 further experimental validation (Figure 1).

### 459 **3.7 Highly efficient and precise detection of gene expression via nCounter** 460 **gene expression assays potentiated transcriptomic outcomes**

461 Routinely, the findings of transcriptomic analyses are generally validated in an *in vitro* setting  
462 via gene expression analysis (employing RT-qPCR) using the same RNA sample to maintain  
463 homogeneity. In lieu of the high-throughput nature of the validation in this study, RT-qPCR  
464 analysis could have been very tedious and prone to numerous errors. Hence, as a viable and  
465 more pragmatic alternative, the latest and highly precise gene expression assay-based  
466 nCounter system approach (NanoString Technologies, Inc.) was employed to validate the  
467 outcomes of the transcriptome analysis in this study. To accomplish this, 90 specific custom-  
468 designed molecular probes corresponding to the selected MK2-regulated candidate genes  
469 were procured to aid in the imaging and fast detection of multiple transcripts (90 in this  
470 study) in a single reaction with a high-fidelity rate (NanoString Technologies, Inc.). The gene  
471 set comprised 86 selected genes from the transcriptomic profiling as well as 4 HKGs (listed  
472 in Table ST9 and ST10, respectively). 4 commonly used reference genes, viz. ABCF1,  
473 GAPDH, POLR2A, and RPL19, were selected based on an extensive literature survey and  
474 because of their baseline expression in both HNSCC as well as in MK2-knockdown  
475 conditions [47, 48].

476 The assay was performed using the standard procedure as highlighted in Figure S4  
477 and S9 and detailed in the methods section. Briefly, the custom synthesized probes were  
478 hybridized to the target RNA samples followed by washing off the excess probes. Further,  
479 immobilization of the probe/RNA complexes on the nCounter cartridge was performed,  
480 samples were run on the nCounter instrument followed by data retrieval (NanoString  
481 Technologies, Inc.). Some of these genes were differentially expressed in the analyzed  
482 datasets as indicated by the statistical analysis ( $p < 0.05$ ). Next, to make sense of the biological  
483 significance of changes in gene expression in the nCounter data, KEGG pathway enrichment  
484 analysis was performed that revealed the top 5 biological processes (Figure 6a and 6b).

485 Furthermore, heat map analysis deciphered the clustering of the gene expression profiles  
486 among the various datasets (Figure 6c). The results from the nCounter assays correlated with  
487 the transcriptomic analysis (Table 2, 3 and 4), hence substantiating the findings.

488 Individually, the expression profile and variation in FC among the DEGs in the  
489 nCounter analysis in the *in vitro* CodeSet of 39 genes (Table ST3 and ST7) and in the *in vivo*  
490 CodeSet of 48 genes (Table ST8) have been showcased *via* the heat-map representations in  
491 Figure 6d, respectively. The results depict the upregulated and downregulated DEGs in the  
492 nCounter assays and the results were in consonance with the transcriptomic profiling with a  
493 high percentage of genes showing a similar pattern of expression and even matching FC  
494 values as shown in Table 3 and 4. For the B vs A dataset, a total of 39 genes were analyzed,  
495 out of which 24 matched the transcriptomic analysis (61.6% matching score). The matched  
496 genes were then analyzed for FC and BRD2 was found to be the only upregulated gene  
497 ( $FC > 2$ ), while CLK2 was the only downregulated gene ( $FC < 2$ ). Similarly, a step-by-step  
498 comprehensive analysis of all the datasets was performed and 12 DEGs that were common in  
499 the transcriptomic and nCounter analysis were revealed (the results are summarized in Table  
500 2). Notably, these genes are key players in important processes such as apoptosis, cell cycle  
501 progression, and transcription regulation, hence, potentiating their role as important MK2-  
502 regulated genes involved in HNSCC pathogenesis (Figure 7d). Therefore, these results  
503 strengthen our recent findings that MK2 is critically important in regulating HNSCC and  
504 functions by modulating the transcript stability of crucial genes driving pathogenesis.  
505 Furthermore, detailed statistical analysis accentuated that the expression of only 7 (BMP7,  
506 CREB3L1, IGFBP2, MELK, MUC4, PRKAR2B, and ZNF662), out of the 12 candidate  
507 genes were significantly different among the datasets ( $FC > 2$  or  $< -2$ ,  $p < 0.05$ ) (Table 2, 3, and  
508 4). MELK was the only gene belonging to the C vs A dataset (cell line comparison) while the  
509 other 6 genes were from the F vs E dataset (xenograft comparison). Moving forward, these 6  
510 genes (BMP7, CREB3L1, IGFBP2, MUC4, PRKAR2B, and ZNF662) were analyzed *in vitro*

511 by IHC and RT-qPCR analyses to ascertain the transcriptomic and nCounter findings in an  
512 experimental HNSCC xenograft model (Figure 7).

513 **3.8 Immunohistochemical and RT-qPCR analyses indicated the putative role of MK2-**  
514 **regulated candidate genes in HNSCC pathogenesis**

515 IHC and RT-qPCR were performed to probe the role of the 6 candidate genes in HNSCC  
516 pathogenesis and further accentuate the consonance among the transcriptomic and nCounter  
517 data analyses. Sections from the xenograft tumor tissues were analyzed using IHC to evaluate  
518 the protein expression pattern of the 6 candidate genes (BMP7, CREB3L1, IGFBP2, MUC4,  
519 PRKAR2B, and ZNF662) (Figure 7a). The results revealed that xenograft tumor sections  
520 with an unregulated expression of these genes have cellular pleomorphism, mitotic figures,  
521 and formation of nests of tumor cells, thus, clearly indicating the aggressiveness of HNSCC  
522 neoplasms. The results obtained from the IHC analysis largely strengthened the findings of  
523 the transcriptomic and nCounter analyses. Out of the 6 candidate genes, *in situ* protein  
524 expression levels of MK2-regulated candidate genes IGFBP2, MUC4, and PRKAR2B were  
525 found to be upregulated in the tumor xenografts created using CAL27-MK2<sub>KD</sub> cells as  
526 compared to CAL27-MK2<sub>WT</sub> cells and corroborated with the transcriptome and nCounter  
527 analyses (Figure 7a). There was no significant change in the protein expression levels of the 3  
528 other analyzed genes BMP7, CREB3L1, and ZNF662 (data not shown).

529 Additionally, to examine the role of MK2 in governing the transcript stability of these  
530 genes, RT-qPCR analysis was performed in MK2-knockdown cells. CAL27 cells were  
531 treated with the shRNA complex to generate CAL27-MK2<sub>KD</sub> cells as previously described [5]  
532 and shown in Figure 7b. Post-knockdown, CAL27-MK2<sub>KD</sub>, and CAL27-MK2<sub>WT</sub> (scrambled  
533 control transfected cells) were treated with Act-D (1  $\mu$ M) to halt *de novo* transcription. RT-  
534 qPCR was carried out post-Act-D treatments at 6 different time points (0, 0.5, 1, 2, 4, and 8  
535 hours) to determine the transcript expression levels and stability. Transcript levels were

536 compared for each time point between the WT and KD group. The results revealed that the  
537 transcript expression of IGFBP2, MUC4, and PRKAR2B exhibited time-dependent  
538 transcriptional decay in CAL27-MK2<sub>KD</sub> cells as compared to CAL27-MK2<sub>WT</sub> cells (Figure  
539 7c). The IGFBP2 transcript level was 0.99-fold in CAL27-MK2<sub>KD</sub> cells which were  
540 equivalent to that in CAL27-MK2<sub>WT</sub> cells (t=0), while the PRKAR2B transcript level was  
541 1.2-fold higher in CAL27-MK2<sub>KD</sub> cells as compared to CAL27-MK2<sub>WT</sub> cells (t=0). The  
542 expression levels of these genes were stabilized for 1 hour for IGFBP2 and 2 hours for  
543 PRKAR2B post-Act-D treatment but gradually showed a significant reduction to less than  
544 half the levels (t=4 and t=8) in CAL27-MK2<sub>KD</sub> cells compared to CAL27-MK2<sub>WT</sub> cells  
545 (Figure 7c). This timeframe of stability may provide sufficient opportunity for the transcript  
546 to be expressed and upregulated at the protein level, which was observed in the IHC analysis  
547 of the tumor sections (Figure 7c). This suggested that the regulation could be at the transcript  
548 level and not at the protein level. However, the MUC4 transcript level was 16-fold lower in  
549 CAL27-MK2<sub>KD</sub> cells as compared to CAL27-MK2<sub>WT</sub> cells (t=0) but remained stable until 1  
550 hour (t=1) post-Act-D treatment and decreased significantly (>50%) afterward (t=4) (Figure  
551 7c). Taken together, the transcripts of all the 3 genes were degraded in MK2-knockdown cells  
552 after maintaining stable transcript levels for a few hours. This finding indicates a strong  
553 association of these genes with the expression profile of MK2 in the cells. Conclusively, the  
554 results suggested that the expression levels of IGFBP2, MUC4, and PRKAR2B are strongly  
555 affected by MK2 expression in HNSCC cells and tumors.

#### 556 **4. Discussion**

557 To improve the understanding of convoluted biology and leverage the outcomes to optimize  
558 the management of HNSCC, there have been many efforts to characterize its pathology at the  
559 transcript level. Methodological breakthroughs in the recent past have revolutionized the area  
560 of transcriptome profiling by providing a link between molecular mechanisms and cellular

561 phenotypes [23, 49]. In recent times, a comprehensive landscape of genomic and  
562 transcriptomic alterations in squamous tumors including HNSCC has emerged by way of the  
563 TCGA network [17, 18]. However, cellular models that can comprehensively characterize  
564 metastatic HNSCC are still lacking, hence, translationally relevant transcriptome profiling  
565 underlying the basis of HNSCC metastasis will prove to be a powerful tool for future  
566 preclinical research endeavors [50, 51]. help many established methods help in the detection  
567 of DEGs for both microarray-based approaches and RNA-seq [52, 53]. A typical  
568 transcriptome profiling result is generally a never-ending list comprising thousands of DEGs,  
569 hence, it has always been very difficult to interpret this data without additional filtering *via*  
570 functional annotations. A large variety of methods are available for the analysis of DEGs and  
571 for obtaining a critical understanding of the pathways, gene regulatory, and co-expression  
572 networks involved [54, 55]. In the present study, we undertook the challenge of thoroughly  
573 dissecting the huge complexity and large heterogeneity in HNSCC to discern novel  
574 biomarkers and potential therapeutic targets.

575         Keeping in mind the critical findings from previous studies, we performed  
576 transcriptome profiling of both the *in vitro* cell line as well as *in vivo* xenograft tumor  
577 samples that resulted in thousands of DEGs. These genes were segregated based on their  
578 clustering in various biological processes (Table ST2, ST4, and ST6). In line with the  
579 primary goal, the processes were filtered based on relevance in cancer leading us to 5  
580 overlapping DEGs in the cell line datasets (A-D), viz. DAP3, EHBP, IP6K2, RUNX1, and  
581 SLF2, as listed in Table ST3. EHBP is encoded by the EHBP1 gene, and this protein has been  
582 shown to portray a role in actin reorganization and endocytic trafficking [56]. Polymorphism  
583 in this gene at the single nucleotide level has been reported to cause prostate cancer [57].  
584 SLF2 is a DNA damage response pathway gene that functions by regulating genomic stability  
585 by post-replication repair of damaged DNA [58]. DAP3 has been shown to mediate interferon  
586 (IFN)- $\gamma$  induced cell death in addition to its role in organelle biogenesis as well as

587 maintenance and mitochondrial translation [59, 60]. DAP3 has been characterized by its pro-  
588 apoptotic function as a prognostic factor in gastric cancer and found to be associated with  
589 cancer progression [61]. The protein encoded by the IP6K2 gene has been shown to affect  
590 growth suppression and apoptotic action of IFN- $\beta$  in the physiologic regulation of apoptosis  
591 in ovarian cancers with its deletion leading to HNSCC predisposition [62]. Lastly, the protein  
592 encoded by RUNX1 has been shown to be involved in the activation of EMT *via* the Wnt/ $\beta$ -  
593 catenin pathway and the promotion of metastasis in colon cancer [63]. Further, it has been  
594 reported that RUNX1 depletion in human HNSCC cells causes growth arrest [64].  
595 Collectively, it is quite evident that all these MK2-regulated genes are playing a vital role in  
596 tumor pathogenesis, hence showing consistency with our previous finding of their  
597 involvement in HNSCC pathogenesis.

598         Similarly, a gene regulatory network was generated that depicted a detailed overview  
599 of the various inter-connections and the significantly enriched biological processes affected  
600 by the DEGs in the 14 cancer-specific biological processes in the transcriptome profiling of  
601 the *in vivo* heterotopic HNSCC xenograft dataset (F vs E comparison). TRAF2 has been  
602 reported to have a role in the activation of the NF-kappa-B and JNK pathways [34].  
603 EPB41L1 has been shown to have a high prognostic significance and is involved in cell  
604 adhesion and migration [34 changed]. FOXO3 is a transcriptional activator known to regulate  
605 apoptosis and autophagy in various tumors [36]. H2AFY has been shown to be associated  
606 with lipid metabolism and poor prognosis in liver cancer [37]. YAP1 is an important  
607 candidate gene of the hippo signaling and has shown to be involved in EMT, immune  
608 suppression, and radiation resistance [38]. DIDO1 is a putative transcription factor and has  
609 been reported to have weak pro-apoptotic activities [39] (Figure 3b). In lieu of the above  
610 arguments and considering the role of the MK2-regulated candidate genes in the experimental  
611 analysis, their further exploration as candidates for the development of novel biomarkers and  
612 utilization as potential therapeutic targets in HNSCC management is warranted.



613            Additionally, gene regulatory networks in transcriptome profiling provided  
614 information on the various biological processes regulated by these candidate genes. This  
615 study supplied a wealth of information that can be further explored to study the pathogenesis  
616 of HNSCC in detail, especially in the background of MK2-knockdown and a varied tumor  
617 microenvironment (normoxia/hypoxia). Figure 4a is the representation of a gene regulatory  
618 network depicting the role of MK2 in the regulation of mRNA stability in the various datasets  
619 analyzed and clearly demonstrates that MK2 regulates transcript stability *via* RBP-mediated  
620 regulation with HuR (ELAVL1) and TTP (ZFP36) playing integral roles. Similarly, Figure 4b  
621 portrays the regulatory network that represents the MAPK signaling cluster of the selected  
622 MK2 pathway genes (AUF1, CEBP $\delta$ , CUGBP1, HuR, MK2, MKP-1, p27, p38, TNF- $\alpha$ , TTP,  
623 and VEGF) in the transcriptome profiling data of the *in vitro* HNSCC cell line dataset (B vs  
624 A, normoxic microenvironment) indicated TNF- $\alpha$  and VEGF downregulation. Interestingly,  
625 the transcriptomic profiling results are in complete consonance with our recently published  
626 findings and hence succeed in potentiating and validating the hypothesis that MK2-  
627 knockdown destabilized TNF- $\alpha$  and VEGF in normoxia *via* RBP-mediated interactions [5,  
628 65, 66, 67, 68, 69, 70, 71, 72].

629            Transcriptome analysis techniques are commonly utilized in endeavors to decipher  
630 various molecular mechanisms of tumorigenesis and to fetch out novel prognostic and  
631 therapeutic markers [22, 23, 73]. In this study, we aimed to assess the MK2-regulated  
632 candidate genes playing prominent roles in HNSCC pathogenesis. Using the 3'-UTR-based  
633 filtering criterion detailed before, 34 genes in the *in vitro* A-D datasets and 48 genes in the  
634 xenograft dataset (listed in Table ST7 and ST8) were identified. Further validation using the  
635 nCounter gene expression assay system enabled the digital quantification and single-molecule  
636 imaging of multiple target RNA molecules using multicolor molecular barcodes (Figure S4  
637 and S9). This system provides discrete and accurate counts of RNA transcripts at a high level  
638 of sensitivity and precision [32]. The gene expression assays are independent of any

639 enzymatic reactions or amplification protocols and have no reliance on the degree of  
640 fluorescence intensity to determine target abundance. As a result of these characteristics, and  
641 the highly automated nature of barcoded sample processing, these assays result in highly  
642 accurate and reproducible outcomes. On average, approximately 52% matching score of  
643 transcriptome profiling data was obtained with nCounter gene expression assay-based  
644 validation which is considered a good percentage match considering the high-throughput  
645 nature of the analysis and the various datasets analyzed. Filtering of the DEGs in the matched  
646 data revealed a list of 12 genes (6 upregulated and 6 downregulated in the various analyzed  
647 datasets) that were common in the comprehensive nCounter system-based validation of  
648 transcriptomic profiling (Table 4). Intriguingly, these genes portray crucial roles in processes  
649 such as apoptosis (CLK2, MELK, MUC4), cell cycle regulation (CLK2, MELK), and  
650 transcription regulation (BRD2, H2AFY, SAMD4B, ZNF662).

651 Six candidate genes (BMP7, CREB3L1, IGFBP2, MUC4, PRKAR2B, and ZNF662)  
652 showed statistically significant up/downregulation in the xenograft dataset. Insulin-like  
653 Growth Factor Binding Protein 2 (IGFBP2) has been shown to be a growth promoter gene in  
654 several tumors and is considered a central hub of the oncogenic signaling network governing  
655 transcriptional regulation and promoting epithelial to mesenchymal transition, invasion,  
656 angiogenesis, and metastasis [74] Recently, IGFBP2 has been reported to be a crucial  
657 modulator of metastasis in oral cancer as well [75]. Mucin 4 (MUC4) serves as a major  
658 constituent of mucus secreted by epithelial cells and found overexpressed in a variety of  
659 cancers such as papillary thyroid carcinomas. It is known for promoting tumor growth,  
660 proliferation, and migration [76] [77]. Recent insights have been made into the transcriptional  
661 regulation of protein kinase cAMP-dependent type II regulatory subunit beta (PRKAR2B) by  
662 miRNAs and X-box binding protein 1 leading to a better understanding of PRKAR2B-driven  
663 prostate cancer progression [78]. PRKAR2B has been reported to be involved in the  
664 activation of Wnt/ $\beta$ -catenin along with triggering epithelial to mesenchymal transition

665 leading to metastasis in tumors [79]. Consistent with our findings, these genes have been  
666 suggested to be prognostic indicators and therapeutic targets in various cancers including  
667 HNSCC [74, 75, 76, 77, 78, 79, 80, 81, 82].

668 The protein expression pattern of the 6 candidate genes was further analyzed in tumor  
669 sections from xenografted animals. IHC analysis revealed that IGFBP2, MUC4, and  
670 PRKAR2B were upregulated and prominently expressed in the cytoplasm and stroma of the  
671 tumors generated using CAL27-MK2<sub>KD</sub> cells (Figure 7a). The expression levels of the other 3  
672 genes were not significantly different among the samples. The IHC results were in  
673 consonance with the sequencing data, hence, confirming that these genes display differential  
674 expression patterns between CAL27-MK<sub>WT</sub> and CAL27-MK2<sub>KD</sub> sections. These genes are  
675 widely considered imperative to processes such as cell cycle progression, apoptosis, and  
676 transcriptional regulation. Various studies have reported their role as central hubs for cellular  
677 signaling during oncogenesis and modulating key cellular processes such as apoptosis, cell  
678 cycle progression, epithelial-mesenchymal transition, and metastasis [75, 76, 77, 78, 79].  
679 Additionally, fewer studies have also reported the contrasting role of these genes in  
680 oncogenesis, which is influenced by various factors such as mutation and effects of other  
681 genes on the regulation of gene or protein expression of these three genes [83, 84].

682 Furthermore, RT-qPCR analysis was performed to quantify of transcript expression  
683 and behavior of these genes *in vitro* under MK<sub>WT</sub> and MK2<sub>KD</sub> conditions. CAL27-MK2<sub>KD</sub>  
684 cells were treated with Act-D for different time points and mRNA transcript levels of  
685 IGFBP2, MUC4, and PRKAR2B were evaluated using transcript expression and stability  
686 analysis through RT-qPCR. It was observed that the stability of IGFBP2, PRKAR2B, and  
687 MUC4 transcripts decreased temporally in CAL27-MK2<sub>KD</sub> cells as compared to the CAL27-  
688 MK2<sub>WT</sub> cells. At t=0, the transcript level of IGFBP2 was at the basal level, MUC4 was  
689 downregulated while PRKAR2B was upregulated in CAL27-MK2<sub>KD</sub> cells post-Act-D  
690 treatment. Furthermore, this decay increased significantly at t=1 for IGFBP2 and MUC4 and

691 at t=2 for PRKAR2B (Figure 7c). The initial stability of transcripts could account for the  
692 upregulated protein expression observed in tumor sections of CAL27-MK2<sub>KD</sub> xenografted  
693 mice as assessed by IHC (Figure 7a). This finding also indicates a strong dependence of  
694 IGFBP2, MUC4, and PRKAR2B2 on MK2-mediated regulation *via* RBP-  
695 activation/deactivation mechanism. Since these genes have previously been reported to be  
696 differentially expressed in tumor conditions, the present study substantiated the hypothesis  
697 suggesting the central role of MK2 in this molecular crosstalk. Additionally, these genes have  
698 been shown to be involved in a multitude of cellular processes such as the cell cycle,  
699 apoptosis, transcription, invasion, and metastasis. The contrasting gene and protein  
700 expression levels can be attributed to their regulation either at the transcriptional level or *via*  
701 post-translational modifications. This specific scientific question strongly warrants attention  
702 and future studies to delve deeper into the role of MK2-mediated activation and deactivation  
703 of RBPs that are involved in the transcript stability of these genes. Overall, the results  
704 obtained from IHC, and transcript stability analysis indicated the crucial role of MK2 in the  
705 modulation of the expression pattern of these genes in HNSCC tumors and cells. Finally,  
706 these findings clearly potentiate the importance of these MK2-regulated candidate genes in  
707 HNSCC pathogenesis.

708         Conclusively, the results suggested an observed dependence of these candidate genes  
709 on MK2 for their transcription in HNSCC cells and xenograft tumors. It is worth mentioning  
710 that all these genes are MK2-regulated and potentially play specific roles in HNSCC  
711 pathogenesis and progression. This suggests that they could potentially be used as putative  
712 candidates for further investigations regarding the design of molecular markers and  
713 therapeutics for HNSCC management. Hence, transcriptomic analysis followed by nCounter  
714 assay based primary validation, followed by IHC and transcript stability-based secondary  
715 validation has provided valuable findings that can aid in extending these observations in  
716 future HNSCC-targeted clinical and therapeutic exploratory research.

## 717 **5. Conclusion**

718 In conclusion, the present study substantiates the involvement of MK2 as a critically  
719 important factor in regulating HNSCC by modulating the transcript stability of downstream  
720 genes involved in pathogenesis. The probable mechanism of action is *via* RBP-mediated  
721 regulation and these results are in perfect consonance and augmentation with recent findings  
722 [5]. Comprehensively, few crucial MK2-regulated putative candidate genes were identified in  
723 this study, and their plausible involvement in HNSCC pathogenesis was elucidated, which  
724 could have further exploratory value as putative targets in HNSCC treatment and  
725 management (Figure 7). This study has made it possible to filter down from thousands of  
726 DEGs to a few potential candidate genes using comprehensive transcriptomic and *in vitro*  
727 validation approaches. To delve deeper into the clinical insights of these findings highlighting  
728 the role of MK2-mediated changes in HNSCC pathogenesis, the role of these 3 potential  
729 therapeutic targets warrants further detailed investigations for diagnostic and therapeutic  
730 interventions of HNSCC.

## 731 **6. List of Abbreviations**

732 3'-UTR: 3'-untranslated region  
733 ActD: Actinomycin D  
734 ARE(s): Adenylate-uridylate-rich element(s)  
735 ATCC: American Type Culture Collection  
736 CISBP: Catalog of Inferred Sequence Binding Preferences  
737 Ct: Cycle Threshold  
738 DEG(s): Differentially expressed gene(s)  
739 EHBP1: EH domain binding protein 1  
740 SLF2: SMC5-SMC6 complex localization factor 2  
741 DAP3: Death associated protein 3

- 742 FC: Fold change
- 743 FDR: False discovery rate
- 744 FPKM: Fragments per kilobase of transcript per million mapped
- 745 GFP: Green fluorescent protein
- 746 GO: Gene Ontology
- 747 HKG: House keeping genes
- 748 HNSCCs: Head and neck squamous cell carcinoma(s)
- 749 HQ: High quality
- 750 IAEC: Institutional animal ethics committee
- 751 IFN: Interferon
- 752 IGFBP2: Insulin-like growth factor-binding protein 2
- 753 IP6K2: Inositol hexakisphosphate kinase 2
- 754 IHC: Immunohistochemistry
- 755 KD: Knockdown
- 756 KEGG: Kyoto encyclopedia of genes and genomics
- 757 MAPK: Mitogen-Activated Protein Kinase
- 758 MAPKAPK2 or MK2: Mitogen-activated protein kinase-activated protein kinase 2
- 759 MK2<sub>KD</sub>: MK2-knockdown
- 760 MK2<sub>WT</sub>: MK2 wild-type
- 761 MELK: Maternal embryonic leucine zipper kinase
- 762 MUC4: Mucin 4
- 763 MKP-1: Mitogen-activated protein kinase phosphatase-1
- 764 NGS: Next generation sequencing
- 765 NOD/SCID: Non-obese diabetic/severe combined immunodeficient
- 766 p27: Cyclin-dependent kinase inhibitor 1B
- 767 PRKAR2B: Protein kinase CAMP-dependent type II regulatory subunit beta

768 QC: Quality control  
769 RIN: RNA integrity number  
770 RT-qPCR: Real-time quantitative polymerase chain reaction  
771 RBP(s): RNA-binding protein(s)  
772 RNA-seq: Ribose Nucleic Acid -sequencing  
773 RUNX1: Runt-related transcription factor 1  
774 shRNA: Short hairpin RNA  
775 TCGA: The cancer genome atlas  
776 TNF- $\alpha$ : Tumor necrosis factor-alpha  
777 TTP: Tristetraprolin  
778 VEGF: Vascular endothelial growth factor  
779 WB: Western blotting  
780 WT: Wild type  
781 ZNF662: Zinc finger protein 662

## 782 **7. Declarations**

### 783 **7.1 Availability of Data and materials**

784 The generated datasets (raw reads) from NovaSeq 6000 have been deposited and are  
785 available in the National Centre for Biotechnology Information-Sequence Read Archive  
786 (NCBI-SRA) repository (<https://www.ncbi.nlm.nih.gov/sra>). The SRA BioProject accession  
787 numbers for the submitted bio projects are PRJNA646850 and PRJNA646851. High-  
788 resolution images will be available on request if needed.

### 789 **7.2 Competing interest**

790 The authors declare that they have no competing interests.

### 791 **7.3 Funding**

792 This work was supported by the Council of Scientific and Industrial Research, India (CSIR-  
793 IHBT; Project MLP0204). Funder: Council of Scientific and Industrial Research, India; Grant  
794 Reference Number: Project MLP0204; Author: Dr. Yogendra S. Padwad.

#### 795 **7.4 Authors' contributions**

796 YSP and SS conceptualized, designed the work, and framed the manuscript. SS and PA  
797 performed bench work, experiments, and data analysis. MKS helped with RNA-seq and data  
798 analysis, VP performed IHC imaging and analysis, and NVT helped in xenograft model  
799 generation. SS, PA, VP, and YSP wrote and edited the manuscript. All the authors read and  
800 approved the final version of the manuscript.

#### 801 **7.5 Acknowledgments**

802 The authors would like to thanks to the Director, CSIR-IHBT, Palampur for his consistent  
803 encouraging support. SS is immensely thankful to CSIR and PA to DST (DST/INSPIRE  
804 Fellowship/2017/IF170140) for providing Ph.D. fellowship and Academy of Scientific and  
805 Innovative Research (AcSIR), Ghaziabad, India for Ph.D. registration. The authors would  
806 like to thank Bionivid Technology Private Limited, Bengaluru, India for their inputs in  
807 transcriptome data analysis. CSIR-IHBT communication number of this manuscript is 4682.

#### 808 **7.6 Additional Files**

809 There are 2 Additional files for this manuscript: Additional File 1 (9 supplementary figures,  
810 labeled as Figure S1 – Figure S9) and Additional File 2 (10 supplementary tables, labeled as  
811 Figure ST1 – Figure ST10).

#### 812 **Figure Legends:**

813 **Figure 1:** Schematic pictorial illustration of the analysis and validation workflow used for  
814 transcriptomic profiling and represents the key outcomes obtained with the work plan.



815 Detailed analysis work plan and validation scheme indicating the two distinct sample types  
816 used for the experimental analysis and their output in terms of DEGs, significant biologies,  
817 important filtered out genes, and their validation. Analysis workflow of the dataset obtained  
818 from **a)** RNA-seq of cell line samples. **b)** RNA-Seq of tumor xenograft samples. This section  
819 represents the initial filtering of the transcriptome data for the identification of crucial  
820 biological processes and genes for all the experimental datasets. Additionally, expression  
821 levels and gene networks were checked for two categories of genes, first for the genes that  
822 are transcriptionally regulated by MK2 and second, for the genes having their mRNA  
823 stability controlled by MK2 through RBP-mediated regulation. Thereafter, MK2-regulated  
824 transcripts that harbor RBP specific regions in their 3'-UTRs were identified in all datasets,  
825 providing 34 genes in A to D comparisons and 48 in F vs E comparisons which were further  
826 analyzed by nCounter gene expression analysis. Finally, **c)** validation workflow of the MK2-  
827 regulated transcripts that harbor RBP specific regions in their 3'-UTRs filtered out from cell  
828 line and tumor samples, and 7 common DEGs in transcriptomic and nCounter gene  
829 expression assay were identified, 6 of them from the F vs E dataset were subjected to IHC  
830 validation and filtered 3 leads were subjected to transcript stability evaluation.

831 **Figure 2:** **a)** Workflow of sequencing analysis showing sequential steps and various tools  
832 and pipelines employed for transcriptome profiling. **b), c)** A comparative bar diagram  
833 representation of the number of (b) DEGs; and (c) Significant biologies/Biological processes,  
834 present in various datasets in the transcriptome profiling study. **d)** Pie chart representation of  
835 the top five GO terms and pathway summary based on all the DEGs in the various datasets  
836 showing approximately 5% of the total DEGs belonging to the pathways involved in cancer  
837 progression. **e)** Non-hierarchical heatmap representation depicting the expression profile and  
838 variation in average log<sub>2</sub> fold change among DEGs in various datasets in the transcriptome  
839 profiling study. The color bar represents the expression values with green representing the

840 lowest (downregulation) and red representing the highest (upregulation) expression levels.

841 The various datasets used for expression profiling are labeled on the top. **f)** Volcano plot

842 representation of the complete transcript list according to their average log<sub>2</sub> fold change and

843 p-values for various datasets in the transcriptome profiling study with differential transcripts

844 highlighted in blue. The plot displays DEGs along the dimensions of biological significance

845 (average log<sub>2</sub> fold change) and statistical significance (p). Genes with an absolute log<sub>2</sub> fold

846 change > 2 and a p-value < 0.05 were considered as DEGs. **g)** Venn diagram representation

847 created using Venny 2.1.0 showing the 77 common elements in the transcriptome profiling of

848 the *in vitro* HNSCC cell line model (A-D datasets). **h)** Venn diagram representation created

849 using Venny 2.1.0 showing the five common genes in the 77 common elements in the

850 transcriptome profiling of the *in vitro* HNSCC cell line model (A-D datasets). **i)** Venn

851 diagram representation created using Venny 2.1.0 showing the two common genes in the 16

852 common elements in the transcriptome profiling of the *in vitro* HNSCC cell line model (A-D

853 datasets).

854 **Figure 3:** Gene regulatory network depicting a detailed overview of the various

855 interconnections and the significantly enriched biological processes affected by the 5

856 common genes (DAP3, EHBP1, IP6K2, RUNX1 SLF2). Network represented in 77 common

857 elements in the datasets where MK2 knockdown is present; **a)** B vs A comparison of the

858 transcriptome profiling of the *in vitro* HNSCC cell line model. **b)** Gene regulatory network

859 depicting a detailed overview of the various interconnections and the significantly enriched

860 biological processes affected by the DEGs in 14 cancer-specific biological processes in the

861 transcriptome profiling of the *in vivo* heterotopic HNSCC xenograft dataset (F vs E

862 comparison). The gene nodes are sized according to their p-values and colored according to

863 their average log<sub>2</sub> fold change, where red shows upregulation while green shows

864 downregulation; processes are shown in rectangular boxes and colored in blue.

865 **Figure 4: a)** Representation of a gene regulatory network depicting the role of MK2 in the  
866 regulation of mRNA stability in the various datasets. The figure clearly demonstrates that  
867 MK2 regulates transcript stability *via* RBP-mediated regulation with HuR (ELAVL1) and  
868 TTP (ZFP36) playing an integral part. **b), c)** Gene regulatory network showing MAPK  
869 signaling cluster of the selected MK2 pathway genes (p38, MK2, AUF1, TTP, CUGBP1,  
870 CEBP $\delta$ , HuR, MKP-1, p27, TNF- $\alpha$ , and VEGF) in the transcriptome profiling data of the (b)  
871 *in vitro* HNSCC cell line dataset (B vs A, normoxic microenvironment) indicating VEGF and  
872 TNF- $\alpha$  downregulation. (c) In F vs E comparison, these genes which portray essential roles in  
873 the MK2 pathway are playing intrinsic roles in certain cellular pathways that are clustered  
874 into 6 major biological processes such as immune response, regulation of mRNA stability,  
875 regulations of cytokines, MAPK signaling, cell migration, and signaling pathways. The gene  
876 nodes are sized according to their p-values and colored according to their average log2 fold  
877 change, where red shows upregulation while green shows downregulation and yellow  
878 indicates baseline expression; processes are shown in rectangular boxes and colored in blue.

879 **Figure 5:** 3'-UTR based filtering of cancer-specific biological processes from a cell line (16  
880 processes) and xenograft tumor (54 processes) datasets to identify MK2-regulated transcripts  
881 that harbor RBP specific regions in their 3'-UTRs. **a)** Schematic representation of the applied  
882 workplan. **b)** and **c)** Regulatory network of MK2-regulated genes harboring RBP specific  
883 regions in their 3'-UTRs; b) total 34 in the B vs A, D vs C, D vs B and C vs A datasets, and c)  
884 total 48 in the F vs E datasets. The gene nodes are sized according to their p-values and  
885 colored according to their average log2 fold change, where red shows upregulation while  
886 green shows downregulation and yellow indicates baseline expression; processes are shown  
887 in rectangular boxes and colored in blue.

888 **Figure 6:** Pie chart representation of the top five gene ontologies and pathway summaries  
889 based on all the DEGs in the various analyzed datasets used for the nCounter gene expression

890 assay for **a)** *in vitro* HNSCC cell line model (A-D datasets) and **b)** *in vivo* heterotopic  
891 HNSCC xenograft model (F vs E dataset). **c)** Representative nonhierarchical heatmap  
892 representation depicting the expression profile and variation in average log<sub>2</sub> FC among the  
893 DEGs considering the complete CodeSet of 86 genes post-3'-UTR filtering and **d)** the  
894 individual CodeSet of 39 selected genes for the *in vitro* HNSCC cell line model (A-D  
895 datasets) and 48 selected genes for the *in vivo* heterotopic HNSCC xenograft dataset post-  
896 3'UTR-filtering. The various analyzed datasets used for expression profiling are labeled on  
897 the top: *in vitro* HNSCC cell line model (A-D datasets) where Lane 1-KDH is Dataset D  
898 (CAL27-MK2<sub>KD</sub> cells in Hypoxia); Lane 2-NH is Dataset C (CAL27-MK2<sub>WT</sub> cells in  
899 Hypoxia); Lane 5-KDN is Dataset B (CAL27-MK2<sub>KD</sub> cells in Normoxia); Lane 6-NN is  
900 Dataset A (CAL27-MK2<sub>WT</sub> cells in Normoxia), and *in vivo* heterotopic HNSCC xenograft  
901 dataset where Lane 3-KDX is CAL27-MK2<sub>KD</sub> cells grafted (F dataset) and Lane 4-NX is  
902 CAL27-MK2<sub>WT</sub> cells grafted (E dataset). Distinct clusters of upregulated and downregulated  
903 genes are visible in each combination. The color bar represents the expression values with  
904 green representing the upregulation and red representing the downregulation expression  
905 levels.

906 **Figure 7: a)** Representation of the *in-situ* protein expression levels of the three candidate  
907 MK2-regulated genes (IGFBP2, MUC4, PRKAR2B) in HNSCC xenografted mice tumor  
908 sections by immunohistochemical analysis. Different color bars represent the expression  
909 values in terms of mean score, the blue bar represents the expression level in CAL27-MK2<sub>WT</sub>  
910 tissue sections (Dataset E), and the red bar signifies *In-situ* protein expression in CAL27-  
911 MK2<sub>KD</sub> tissue sections (Dataset F). Parametric Welch t-test was used to evaluate the  
912 statistical significance using GraphPad Prism 7.0 software, \*\* denotes p<0.01; n=5 field  
913 views for IHC analysis. **b)** Western blot depicting MK2 expression in CAL27-MK2<sub>KD</sub> cells  
914 generated post MK2 knockdown using shRNA for transcript stability experiment, here, SC-

915 Scrambled control; shMix- A combination of an equal quantity of MK2 targeting shRNA  
916 complexes 1, 2, 3, and 4; the shMix group was used for transcript stability experiments, and  
917 SC was used as a control. **c)** Gene expression patterns of the 3 candidate genes in CAL27-  
918 MK2<sub>KD</sub> cells at different time points post-Act-D treatment to assess the role of MK2 in  
919 regulating transcript stability. Data points represent the fold change in the shMix group at a  
920 particular time interval as compared to the control group. Linear regression analysis was  
921 performed using GraphPad Prism 7.0 software. **d)** Pictorial representation of the MAPK  
922 pathway analyzed in this study, the illustration depicts the activation of MK2 and the  
923 plausible mode of action in HNSCC pathogenesis. Figure elucidates the final MK2-regulated  
924 putative candidate genes in the pathway that were obtained in this study which could be  
925 further explored as possible targets for HNSCC management.

## 926 **References**

- 927 1. Spataro N, Rodríguez JA, Navarro A, Bosch E. Properties of human disease genes  
928 and the role of genes linked to Mendelian disorders in complex disease aetiology.  
929 *Human Molecular Genetics*. 2017 Feb 1;26(3):489–500.  
930 <https://doi.org/10.1093/hmg/ddw405>
- 931 2. Lasa M, Mahtani KR, Finch A, Brewer G, Saklatvala J, Clark AR. Regulation of  
932 Cyclooxygenase 2 mRNA Stability by the Mitogen-Activated Protein Kinase p38  
933 Signaling Cascade. *Molecular and Cellular Biology*. 2000 Jun 15;20(12):4265–74.  
934 <https://doi.org/10.1128/mcb.20.12.4265-4274.2000>
- 935 3. Venigalla RK, Turner M. RNA-binding proteins as a point of convergence of the  
936 PI3K and p38 MAPK pathways. *Frontiers in Immunology*. 2012;3:398.  
937 <https://doi.org/10.3389/fimmu.2012.00398>

- 938 4. Soni S, Anand P, Padwad YS. MAPKAPK2: the master regulator of RNA-binding  
939 proteins modulates transcript stability and tumor progression. *Journal of Experimental*  
940 *& Clinical Cancer Research*. 2019 Mar 8;38(1):121. [https://doi.org/10.1186/s13046-](https://doi.org/10.1186/s13046-019-1115-1)  
941 [019-1115-1](https://doi.org/10.1186/s13046-019-1115-1)
- 942 5. Soni S, Saroch MK, Chander B, Tirpude NV, Padwad YS. MAPKAPK2 plays a  
943 crucial role in the progression of head and neck squamous cell carcinoma by  
944 regulating transcript stability. *Journal of Experimental & Clinical Cancer Research*.  
945 2019 Apr 25;38(1):175. <https://doi.org/10.1186/s13046-019-1167-2>
- 946 6. Chow LQM. Head and neck cancer. *New England Journal of Medicine* 2020;  
947 382(1):60–72. <https://doi.org/doi:10.1056/NEJMra1715715>
- 948 7. Siegel RL, Miller KD, Fuchs HE, Jemal A. Cancer statistics, 2021. *CA: A Cancer*  
949 *Journal for Clinicians* 2021; 71(1):7–33. <https://doi.org/10.3322/caac.21654>
- 950 8. Woolgar JA, Triantafyllou A. Squamous cell carcinoma and precursor lesions: clinical  
951 pathology. *Periodontology* 2000. 2011;57(1):51–72. [https://doi.org/10.1111/j.1600-](https://doi.org/10.1111/j.1600-0757.2011.00389.x)  
952 [0757.2011.00389.x](https://doi.org/10.1111/j.1600-0757.2011.00389.x)
- 953 9. Martin D, Abba MC, Molinolo AA, Vitale-Cross L, Wang Z, Zaida M, et al. The head  
954 and neck cancer cell oncogenome: A platform for the development of precision  
955 molecular therapies. *Oncotarget*. 2014 Nov 4;5(19):8906–23.  
956 <https://doi.org/10.18632/oncotarget.2417>
- 957 10. Waes CV, Musbahi O. Genomics and advances towards precision medicine for head  
958 and neck squamous cell carcinoma. *Laryngoscope Investigative Otolaryngology*.  
959 2017;2(5):310–9. <https://doi.org/10.1002/lio2.86>

- 960 11. Denaro N, Russi EG, Adamo V, Merlano MC. State-of-the-Art and Emerging  
961 Treatment Options in the Management of Head and Neck Cancer: News from 2013.  
962 OCL. 2014;86(4):212–29. <https://doi.org/10.1159/000357712>
- 963 12. Narayanan SP, Singh S, Gupta A, Yadav S, Singh SR, Shukla S. Integrated genomic  
964 analyses identify KDM1A's role in cell proliferation via modulating E2F signaling  
965 activity and associate with poor clinical outcome in oral cancer. Cancer Letters. 2015  
966 Oct 28;367(2):162–72. <https://doi.org/10.1016/j.canlet.2015.07.022>
- 967 13. Jamali Z, Asl Aminabadi N, Attaran R, Pournagiazar F, Ghertasi Oskouei S,  
968 Ahmadpour F. MicroRNAs as prognostic molecular signatures in human head and  
969 neck squamous cell carcinoma: A systematic review and meta-analysis. Oral  
970 Oncology. 2015 Apr 1;51(4):321–31.  
971 <https://doi.org/10.1016/j.oraloncology.2015.01.008>
- 972 14. Weinberg RA. Coming Full Circle—From Endless Complexity to Simplicity and  
973 Back Again. Cell. 2014 Mar 27;157(1):267–71.  
974 <https://doi.org/10.1016/j.cell.2014.03.004>
- 975 15. Chau NG, Li YY, Jo VY, Rabinowits G, Lorch JH, Tishler RB, et al. Incorporation of  
976 Next-Generation Sequencing into Routine Clinical Care to Direct Treatment of Head  
977 and Neck Squamous Cell Carcinoma. Clin Cancer Res. 2016 Jun 15;22(12):2939–49.  
978 <https://doi.org/10.1158/1078-0432.CCR-15-2314>
- 979 16. Bossi P, Bergamini C, Siano M, Rocca MC, Sponghini AP, Favales F, et al.  
980 Functional Genomics Uncover the Biology behind the Responsiveness of Head and  
981 Neck Squamous Cell Cancer Patients to Cetuximab. Clin Cancer Res. 2016 Aug  
982 1;22(15):3961–70. <https://doi.org/10.1158/1078-0432.CCR-15-2547>

- 983 17. Lawrence MS, Sougnez C, Lichtenstein L, Cibulskis K, Lander E, Gabriel SB, et al.  
984 Comprehensive genomic characterization of head and neck squamous cell  
985 carcinomas. *Nature*. 2015 Jan;517(7536):576–82. <https://doi.org/10.1038/nature14129>
- 986 18. Campbell JD, Yau C, Bowlby R, Liu Y, Brennan K, Fan H, et al. Genomic, Pathway  
987 Network, and Immunologic Features Distinguishing Squamous Carcinomas. *Cell*  
988 *Reports*. 2018 Apr 3;23(1):194-212.e6. <https://doi.org/10.1016/j.celrep.2018.03.063>
- 989 19. Chakraborty A. The inositol pyrophosphate pathway in health and diseases.  
990 *Biological Reviews*. 2018 May;93(2):1203-27. <https://doi.org/10.1111/brv.12392>
- 991 20. Bhatia S, Frangioni JV, Hoffman RM, Iafrate AJ, Polyak K. The challenges posed by  
992 cancer heterogeneity. *Nat Biotechnol*. 2012 Jul;30(7):604–10.  
993 <https://doi.org/10.1038/nbt.2294>
- 994 21. Fiore M, Forli S, Manetti F. Targeting Mitogen-Activated Protein Kinase-Activated  
995 Protein Kinase 2 (MAPKAPK2, MK2): Medicinal Chemistry Efforts To Lead Small  
996 Molecule Inhibitors to Clinical Trials. *J Med Chem*. 2016 Apr 28;59(8):3609–34.  
997 <https://doi.org/10.1021/acs.jmedchem.5b01457>
- 998 22. Fang X-N, Yin M, Li H, Liang C, Xu C, Yang G-W, et al. Comprehensive analysis of  
999 competitive endogenous RNAs network associated with head and neck squamous cell  
1000 carcinoma. *Sci Rep*. 2018 Jul 12;8(1):10544. [https://doi.org/10.1038/s41598-018-  
1001 28957-y](https://doi.org/10.1038/s41598-018-28957-y)
- 1002 23. Cieřlik M, Chinnaiyan AM. Cancer transcriptome profiling at the juncture of clinical  
1003 translation. *Nat Rev Genet*. 2018 Feb;19(2):93–109.  
1004 <https://doi.org/10.1038/nrg.2017.96>



- 1005 24. Swarnkar MK, Kumar P, Dogra V, Kumar S. Prickle morphogenesis in rose is  
1006 coupled with secondary metabolite accumulation and governed by canonical MBW  
1007 transcriptional complex. *Plant direct*. 2021 Jun;5(6):e00325.
- 1008 25. Patel RK, Jain M. NGS QC Toolkit: A Toolkit for Quality Control of Next Generation  
1009 Sequencing Data. *PLOS ONE*. 2012 Feb 1;7(2):e30619.  
1010 <https://doi.org/10.1371/journal.pone.0030619>
- 1011 26. Mortazavi A, Williams BA, McCue K, Schaeffer L, Wold B. Mapping and  
1012 quantifying mammalian transcriptomes by RNA-Seq. *Nature methods*. 2008  
1013 Jul;5(7):621-8. <https://doi.org/10.1038/nmeth.1226>
- 1014 27. Anders, S. and Huber, W., 2010. Differential expression analysis for sequence count  
1015 data. *Nature Precedings*, pp.1-1. <https://doi.org/10.1186/gb-2010-11-10-r106>
- 1016 28. Huang DW, Sherman BT, Lempicki RA. Bioinformatics enrichment tools: paths  
1017 toward the comprehensive functional analysis of large gene lists. *Nucleic Acids*  
1018 *Research*. 2009 Jan 1;37(1):1–13. <https://doi.org/10.1093/nar/gkn923>
- 1019 29. Huang DW, Sherman BT, Lempicki RA. Systematic and integrative analysis of large  
1020 gene lists using DAVID bioinformatics resources. *Nat Protoc*. 2009 Jan;4(1):44–57.  
1021 <https://doi.org/10.1038/nprot.2008.211>
- 1022 30. Dennis G, Sherman BT, Hosack DA, Yang J, Gao W, Lane HC, et al. DAVID:  
1023 Database for Annotation, Visualization, and Integrated Discovery. *Genome Biology*.  
1024 2003 Aug 14;4(9):R60. <https://doi.org/10.1186/gb-2003-4-9-r60>
- 1025 31. Montojo J, Zuberi K, Rodriguez H, Kazi F, Wright G, Donaldson SL, et al.  
1026 GeneMANIA Cytoscape plugin: fast gene function predictions on the desktop.

- 1027            Bioinformatics.                            2010                            Nov                            15;26(22):2927–8.
- 1028            <https://doi.org/10.1093/bioinformatics/btq562>
- 1029            32. Brumbaugh CD, Kim HJ, Giovacchini M, Pourmand N. NanoStriDE: normalization  
1030            and differential expression analysis of NanoString nCounter data. BMC  
1031            Bioinformatics. 2011 Dec 16;12(1):479. <https://doi.org/10.1186/1471-2105-12-479>
- 1032            33. Wazir U, Orakzai MM, Khanzada ZS, Jiang WG, Sharma AK, Kasem A, et al. The  
1033            role of death-associated protein 3 in apoptosis, anoikis and human cancer. Cancer Cell  
1034            International. 2015 Apr 10;15(1):39. <https://doi.org/10.1186/s12935-015-0187-z>
- 1035            34. Zhang MH, Zhang HH, Du XH, Gao J, Li C, Shi HR, Li SZ. UCHL3 promotes  
1036            ovarian cancer progression by stabilizing TRAF2 to activate the NF- $\kappa$ B pathway.  
1037            Oncogene. 2020 Jan;39(2):322-33. <https://doi.org/10.1038/s41388-019-0987-z>
- 1038            35. Liang T, Sang S, Shao Q, Chen C, Deng Z, Wang T, Kang Q. Abnormal expression  
1039            and prognostic significance of EPB41L1 in kidney renal clear cell carcinoma based on  
1040            data mining. Cancer cell international. 2020 Dec;20(1):1-4.  
1041            <https://doi.org/10.1186/s12935-020-01449-8>
- 1042            36. Liu Y, Ao X, Ding W, Ponnusamy M, Wu W, Hao X, Yu W, Wang Y, Li P, Wang J.  
1043            Critical role of FOXO3a in carcinogenesis. Molecular cancer. 2018 Dec;17(1):1-2.  
1044            <https://doi.org/10.1186/s12943-018-0856-3>
- 1045            37. Ma X, Ding Y, Zeng L. The diagnostic and prognostic value of H2AFY in  
1046            hepatocellular carcinoma. BMC Cancer. 2021 Apr 15;21(1):418.  
1047            <https://doi.org/10.1186/s12885-021-08161-4>
- 1048            38. Li F, Xu Y, Liu B, Singh PK, Zhao W, Jin J, et al. YAP1-Mediated CDK6 Activation  
1049            Confers Radiation Resistance in Esophageal Cancer – Rationale for the Combination

- 1050 of YAP1 and CDK4/6 Inhibitors in Esophageal Cancer. *Clin Cancer Res.* 2019 Apr  
1051 1;25(7):2264–77. <https://doi.org/10.1158/1078-0432.CCR-18-1029>
- 1052 39. Li J, Wang AS, Wang S, Wang CY, Xue S, Li WY, Ma TT, Shan YX. Death-inducer  
1053 obliterator 1 (DIDO1) silencing suppresses the growth of bladder cancer cells through  
1054 decreasing SAPK/JNK signaling cascades. *Neoplasma.* 2020 Jan 1;67(5):1074-84.  
1055 [https://doi.org/10.4149/neo\\_2020\\_191115N01171](https://doi.org/10.4149/neo_2020_191115N01171)
- 1056 40. Winzen R, Kracht M, Ritter B, Wilhelm A, Chen CY, Shyu AB, Müller M, Gaestel  
1057 M, Resch K, Holtmann H. The p38 MAP kinase pathway signals for cytokine-induced  
1058 mRNA stabilization via MAP kinase-activated protein kinase 2 and an AU-rich  
1059 region-targeted mechanism. *The EMBO journal.* 1999 Sep 15;18(18):4969-80.  
1060 <https://doi.org/10.1093/emboj/18.18.4969>
- 1061 41. Krismer K, Bird MA, Varmeh S, Handly ED, Gattinger A, Bernwinkler T, Anderson  
1062 DA, Heinzl A, Joughin BA, Kong YW, Cannell IG. Transite: A computational  
1063 motif-based analysis platform that identifies RNA-binding proteins modulating  
1064 changes in gene expression. *Cell reports.* 2020 Aug 25;32(8):108064.  
1065 <https://doi.org/10.1016/j.celrep.2020.108064>
- 1066 42. Vejnar, C.E., Messih, M.A., Takacs, C.M., Yartseva, V., Oikonomou, P., Christiano,  
1067 R., Stoeckius, M., Lau, S., Lee, M.T., Beaudoin, J.D. and Musaev, D., 2019. Genome  
1068 wide analysis of 3' UTR sequence elements and proteins regulating mRNA stability  
1069 during maternal-to-zygotic transition in zebrafish. *Genome research*, 29(7), pp.1100-  
1070 1114. <https://doi.org/10.1101/gr.245159.118>
- 1071 43. Plass M, Rasmussen SH, Krogh A. Highly accessible AU-rich regions in  
1072 3'untranslated regions are hotspots for binding of regulatory factors. *PLoS*

- 1073 computational biology. 2017 Apr 14;13(4):e1005460. <https://doi.org/10.1007/978-1->  
1074 [0716-1851-6\\_3](https://doi.org/10.1007/978-1-0716-1851-6_3)
- 1075 44. Aken BL, Ayling S, Barrell D, Clarke L, Curwen V, Fairley S, et al. The Ensembl  
1076 gene annotation system. Database [Internet]. 2016 Jan 1 [cited 2021 Aug  
1077 25];2016(baw093). Available from: <https://doi.org/10.1093/database/baw093>
- 1078 45. Ray D, Kazan H, Cook KB, Weirauch MT, Najafabadi HS, Li X, Gueroussov S, Albu  
1079 M, Zheng H, Yang A, Na H. A compendium of RNA-binding motifs for decoding  
1080 gene regulation. Nature. 2013 Jul;499(7457):172-7.  
1081 <https://doi.org/10.1038/nature12311>
- 1082 46. Paz, I., Argoetti, A., Cohen, N., Even, N. and Mandel-Gutfreund, Y., 2022. RBPmap:  
1083 A Tool for Mapping and Predicting the Binding Sites of RNA-Binding Proteins  
1084 Considering the Motif Environment. In Post-Transcriptional Gene Regulation (pp. 53-  
1085 65). Humana, New York, NY. [https://doi.org/10.1007/978-1-0716-1851-6\\_3](https://doi.org/10.1007/978-1-0716-1851-6_3)
- 1086 47. Lallemand B, Evrard A, Combescure C, Chapuis H, Chambon G, Raynal C, et al.  
1087 Reference gene selection for head and neck squamous cell carcinoma gene expression  
1088 studies. BMC Molecular Biology. 2009 Aug 3;10(1):78. <https://doi.org/10.1186/1471->  
1089 [2199-10-78](https://doi.org/10.1186/1471-2199-10-78)
- 1090 48. Palve V, Pareek M, Krishnan NM, Siddappa G, Suresh A, Kuriakose MA, et al. A  
1091 minimal set of internal control genes for gene expression studies in head and neck  
1092 squamous cell carcinoma. PeerJ. 2018 Aug 14;6:e5207.  
1093 <https://doi.org/10.7717/peerj.5207>
- 1094 49. Cheng H, Yang X, Si H, Saleh AD, Xiao W, Coupar J, et al. Genomic and  
1095 Transcriptomic Characterization Links Cell Lines with Aggressive Head and Neck

- 1096 Cancers. Cell Reports. 2018 Oct 30;25(5):1332-1345.e5.  
1097 <https://doi.org/10.1016/j.celrep.2018.10.007>
- 1098 50. Byron SA, Van Keuren-Jensen KR, Engelthaler DM, Carpten JD, Craig DW.  
1099 Translating RNA sequencing into clinical diagnostics: opportunities and challenges.  
1100 Nat Rev Genet. 2016 May;17(5):257–71. <https://doi.org/10.1038/nrg.2016.10>
- 1101 51. Nisa L, Barras D, Medová M, Aebersold DM, Medo M, Poliaková M, et al.  
1102 Comprehensive Genomic Profiling of Patient-matched Head and Neck Cancer Cells:  
1103 A Preclinical Pipeline for Metastatic and Recurrent Disease. Mol Cancer Res. 2018  
1104 Dec 1;16(12):1912–26. <https://doi.org/10.1158/1541-7786.MCR-18-0056>
- 1105 52. Scholtens D, von Heydebreck A. Analysis of Differential Gene Expression Studies.  
1106 In: Gentleman R, Carey VJ, Huber W, Irizarry RA, Dudoit S, editors. Bioinformatics  
1107 and Computational Biology Solutions Using R and Bioconductor [Internet]. New  
1108 York, NY: Springer; 2005 [cited 2021 Aug 26]. p. 229–48. (Statistics for Biology and  
1109 Health). Available from: [https://doi.org/10.1007/0-387-29362-0\\_14](https://doi.org/10.1007/0-387-29362-0_14)
- 1110 53. Love MI, Huber W, Anders S. Moderated estimation of fold change and dispersion  
1111 for RNA-seq data with DESeq2. Genome Biology. 2014 Dec 5;15(12):550.  
1112 <https://doi.org/10.1186/s13059-014-0550-8>
- 1113 54. Ackermann M, Strimmer K. A general modular framework for gene set enrichment  
1114 analysis. BMC Bioinformatics. 2009 Feb 3;10(1):47. <https://doi.org/10.1186/1471-2105-10-47>  
1115
- 1116 55. Mitrea C, Taghavi Z, Bokanizad B, Hanoudi S, Tagett R, Donato M, et al. Methods  
1117 and approaches in the topology-based analysis of biological pathways. Frontiers in  
1118 Physiology. 2013;4:278. <https://doi.org/10.3389/fphys.2013.00278>

- 1119 56. Guilherme A, Soriano NA, Bose S, Holik J, Bose A, Pomerleau DP, et al. EHD2 and  
1120 the Novel EH Domain Binding Protein EHBP1 Couple Endocytosis to the Actin  
1121 Cytoskeleton\*. *Journal of Biological Chemistry*. 2004 Mar 12;279(11):10593–605.  
1122 <https://doi.org/10.1074/jbc.M307702200>
- 1123 57. Sun J, Kader AK, Hsu F-C, Kim S-T, Zhu Y, Turner AR, et al. Inherited genetic  
1124 markers discovered to date are able to identify a significant number of men at  
1125 considerably elevated risk for prostate cancer. *The Prostate*. 2011;71(4):421–30.  
1126 <https://doi.org/10.1002/pros.21256>
- 1127 58. Han X, Wang Z, Zhang L, Shen Y, Tan Q, Sun Y, et al. SLF1 polymorphism predicts  
1128 response to oxaliplatin-based adjuvant chemotherapy in patients with colon cancer.  
1129 *Am J Cancer Res*. 2021 Apr 15;11(4):1522–39.  
1130 <https://doi.org/10.1126/science.1253671>
- 1131 59. Kissil JL, Deiss LP, Bayewitch M, Raveh T, Khaspekov G, Kimchi A. Isolation of  
1132 DAP3, a Novel Mediator of Interferon- $\gamma$ -induced Cell Death (\*). *Journal of Biological*  
1133 *Chemistry*. 1995 Nov 17;270(46):27932–6. <https://doi.org/10.1074/jbc.270.46.27932>
- 1134 60. Tang T, Zheng B, Chen S, Murphy AN, Kudlicka K, Zhou H, et al. hNOA1 Interacts  
1135 with Complex I and DAP3 and Regulates Mitochondrial Respiration and Apoptosis\*.  
1136 *Journal of Biological Chemistry*. 2009 Feb 20;284(8):5414–24.  
1137 <https://doi.org/10.1074/jbc.M807797200>
- 1138 61. Han J, An O, Hong H, Chan THM, Song Y, Shen H, et al. Suppression of adenosine-  
1139 to-inosine (A-to-I) RNA editome by death associated protein 3 (DAP3) promotes  
1140 cancer progression. *Science Advances*. 2020 Jun 1;6(25):eaba5136.  
1141 <https://doi.org/10.1038/bjc.2013.712>

- 1142 62. Morrison BH, Bauer JA, Hu J, Grane RW, Ozdemir AM, Chawla-Sarkar M, et al.  
1143 Inositol hexakisphosphate kinase 2 sensitizes ovarian carcinoma cells to multiple  
1144 cancer therapeutics. *Oncogene*. 2002 Mar;21(12):1882–9.  
1145 <https://doi.org/10.1038/sj.onc.1205265>
- 1146 63. Li Q, Lai Q, He C, Fang Y, Yan Q, Zhang Y, et al. RUNX1 promotes tumour  
1147 metastasis by activating the Wnt/ $\beta$ -catenin signalling pathway and EMT in colorectal  
1148 cancer. *J Exp Clin Cancer Res*. 2019 Aug 1;38(1):334. [https://doi.org/10.1182/blood-](https://doi.org/10.1182/blood-2016-10-687830)  
1149 [2016-10-687830](https://doi.org/10.1182/blood-2016-10-687830)
- 1150 64. Taniuchi I, Osato M, Ito Y. Runx1: no longer just for leukemia. *The EMBO journal*.  
1151 2012 Nov 5;31(21):4098-9. <https://doi.org/10.1038/emboj.2012.282>
- 1152 65. Guo J, Qu H, Chen Y, Xia J. The role of RNA-binding protein tristetraproline in cancer  
1153 and immunity. *Med Oncol*. 2017 Dec;34(12):196. [https://doi.org/10.1007/s12032-](https://doi.org/10.1007/s12032-017-1055-6)  
1154 [017-1055-6](https://doi.org/10.1007/s12032-017-1055-6)
- 1155 66. Balamurugan K, Mendoza-Villanueva D, Sharan S, Summers GH, Dobrolecki LE,  
1156 Lewis MT, Sterneck E. C/EBP $\delta$  links IL-6 and HIF-1 signaling to promote breast  
1157 cancer stem cell-associated phenotypes. *Oncogene*. 2019 May;38(20):3765-80.  
1158 <https://doi.org/10.1038/s41388-018-0516-5>
- 1159 67. Zhang Y, Yang L, Ling C, Heng W. HuR facilitates cancer stemness of lung cancer  
1160 cells via regulating miR-873/CDK3 and miR-125a-3p/CDK3 axis. *Biotechnol Lett*.  
1161 2018 Apr 1;40(4):623–31. <https://doi.org/10.1007/s10529-018-2512-9>
- 1162 68. Hammad A, Zheng Z-H, Namani A, Elshaer M, Wang XJ, Tang X. Transcriptome  
1163 analysis of potential candidate genes and molecular pathways in colitis-associated

- 1164 colorectal cancer of Mkp-1-deficient mice. *BMC Cancer*. 2021 May 25;21(1):607.  
1165 <https://doi.org/10.1186/s12885-021-08200-0>
- 1166 69. Razavipour SF, Harikumar KB, Slingerland JM. p27 as a Transcriptional Regulator:  
1167 New Roles in Development and Cancer. *Cancer Res*. 2020 Sep 1;80(17):3451–8.  
1168 <https://doi.org/10.1158/0008-5472.CAN-19-3663>
- 1169 70. Montfort A, Dufau C, Colacios C, Andrieu-Abadie N, Levade T, Filleron T, et al.  
1170 Anti-TNF, a magic bullet in cancer immunotherapy? *J Immunotherapy Cancer*. 2019  
1171 Nov 14;7(1):303. <https://doi.org/10.1186/s40425-019-0802-y>
- 1172 71. Siemert J, Wald T, Kolb M, Pettinella I, Böhm U, Pirlich M, et al. Pre-Therapeutic  
1173 VEGF Level in Plasma Is a Prognostic Bio-Marker in Head and Neck Squamous Cell  
1174 Carcinoma (HNSCC). *Cancers*. 2021 Jan;13(15):3781.  
1175 <https://doi.org/10.3390/cancers13153781>
- 1176 72. Bergers G, Hanahan D. Modes of resistance to anti-angiogenic therapy. *Nat Rev*  
1177 *Cancer*. 2008 Aug;8(8):592–603. <https://doi.org/10.1038/nrc2442>
- 1178 73. Trapnell C, Williams BA, Pertea G, Mortazavi A, Kwan G, van Baren MJ, et al.  
1179 Transcript assembly and quantification by RNA-Seq reveals unannotated transcripts  
1180 and isoform switching during cell differentiation. *Nat Biotechnol*. 2010  
1181 May;28(5):511–5. <https://doi.org/10.1038/nbt.1621>
- 1182 74. Lindström MS. Expanding the scope of candidate prognostic marker IGFBP2 in  
1183 glioblastoma. *Bioscience reports*. 2019 Jul;39(7):BSR20190770.  
1184 <https://doi.org/10.1042/BSR20190770>
- 1185 75. Tsai Y-F, Chou H-C, Liou M-H, Liao E-C, Cheng C-T, Chang S-J, et al. Role of  
1186 IGFBP-2 in oral cancer metastasis. *Biochimica et Biophysica Acta (BBA) - Molecular*



- 1187 Basis of Disease. 2021 Jul 1;1867(7):166143.  
1188 <https://doi.org/10.1016/j.bbadis.2021.166143>
- 1189 76. Reynolds IS, Fichtner M, McNamara DA, Kay EW, Prehn JH, Burke JP. Mucin  
1190 glycoproteins block apoptosis; promote invasion, proliferation, and migration; and  
1191 cause chemoresistance through diverse pathways in epithelial cancers. *Cancer and*  
1192 *Metastasis Reviews*. 2019 Jun;38(1):237-57. [https://doi.org/10.1007/s10555-019-](https://doi.org/10.1007/s10555-019-09781-w)  
1193 [09781-w](https://doi.org/10.1007/s10555-019-09781-w)
- 1194 77. Xia P, Choi AH, Deng Z, Yang Y, Zhao J, Wang Y, et al. Cell membrane-anchored  
1195 MUC4 promotes tumorigenicity in epithelial carcinomas. *Oncotarget*. 2016 Nov  
1196 4;8(8):14147–57. <https://doi.org/10.18632/oncotarget.13122>
- 1197 78. Xia L, Han Q, Chi C, Zhu Y, Pan J, Dong B, et al. Transcriptional regulation of  
1198 PRKAR2B by miR-200b-3p/200c-3p and XBP1 in human prostate cancer.  
1199 *Biomedicine & Pharmacotherapy*. 2020 Apr 1;124:109863.  
1200 <https://doi.org/10.1016/j.biopha.2020.109863>
- 1201 79. Sha J, Han Q, Chi C, Zhu Y, Pan J, Dong B, Huang Y, Xia W, Xue W. PRKAR2B  
1202 promotes prostate cancer metastasis by activating Wnt/ $\beta$ -catenin and inducing  
1203 epithelial-mesenchymal transition. *Journal of cellular biochemistry*. 2018  
1204 Sep;119(9):7319-27. <https://doi.org/10.1002/jcb.27030>
- 1205 80. Park J, Lee J, Choi C. Evaluation of drug-targetable genes by defining modes of  
1206 abnormality in gene expression. *Sci Rep*. 2015 Sep 4;5(1):13576.  
1207 <https://doi.org/10.1038/srep13576>

- 1208 81. Thangaraj K, Ponnusamy L, Natarajan SR, Manoharan R. MELK/MPK38 in cancer:  
1209 from mechanistic aspects to therapeutic strategies. *Drug Discovery Today*. 2020 Dec  
1210 1;25(12):2161–73. <https://doi.org/10.1016/j.drudis.2020.09.029>
- 1211 82. Zhao C, Zou H, Zhang J, Wang J, Liu H. An integrated methylation and gene  
1212 expression microarray analysis reveals significant prognostic biomarkers in oral  
1213 squamous cell carcinoma. *Oncology Reports*. 2018 Nov 1;40(5):2637–47.  
1214 <https://doi.org/10.3892/or.2018.6702>
- 1215 83. Li, T., Forbes, M.E., Fuller, G.N. *et al.* IGFBP2: integrative hub of developmental and  
1216 oncogenic signaling network. *Oncogene* **39**, 2243–2257 (2020).  
1217 <https://doi.org/10.1038/s41388-020-1154-2>
- 1218 84. Matuschek G, Rudoy M, Peiper M, Gerber PA, Hoff NP, Buhren BA, Flehmig B,  
1219 Budach W, Knoefel WT, Bojar H, Prisack HB. Do insulin-like growth factor  
1220 associated proteins qualify as a tumor marker? Results of a prospective study in 163  
1221 cancer patients. *European journal of medical research*. 2011 Dec;16(10):451-6.  
1222 <https://doi.org/10.1186/2047-783X-16-10-451>

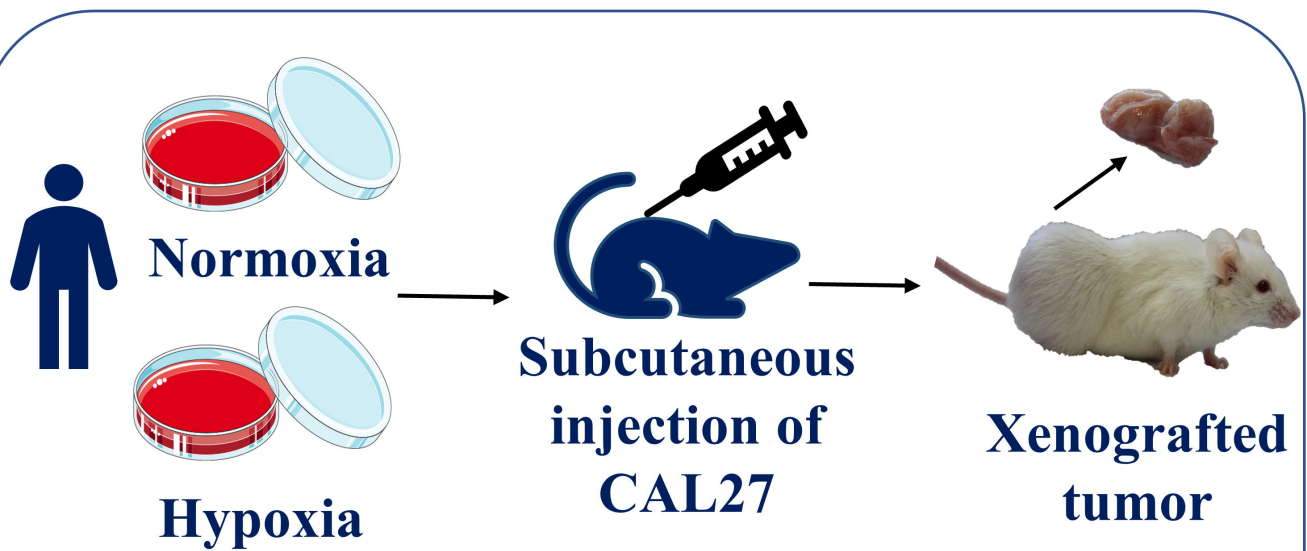

bioRxiv preprint doi: <https://doi.org/10.1101/2020.09.22.303180>; this version posted April 3, 2022. The copyright holder for this preprint (which was not certified by peer review) is the author/funder, who has granted bioRxiv a license to display the preprint in perpetuity. It is made available under aCC-BY 4.0 International license.

**CAL27-MK2KD and CAL27-MK2KD**

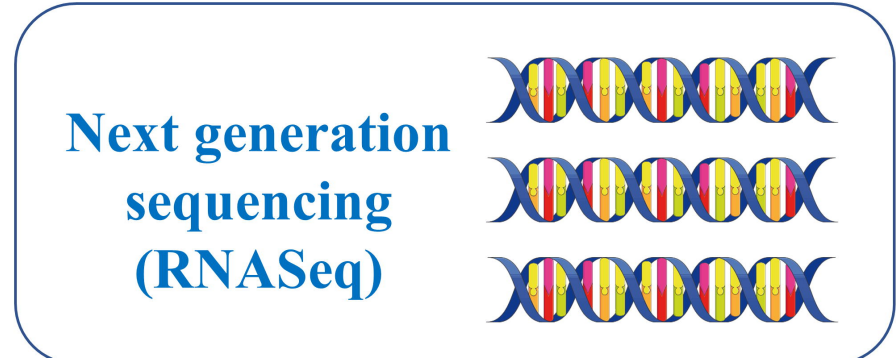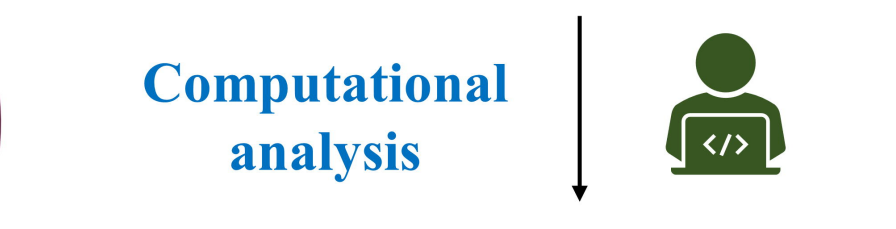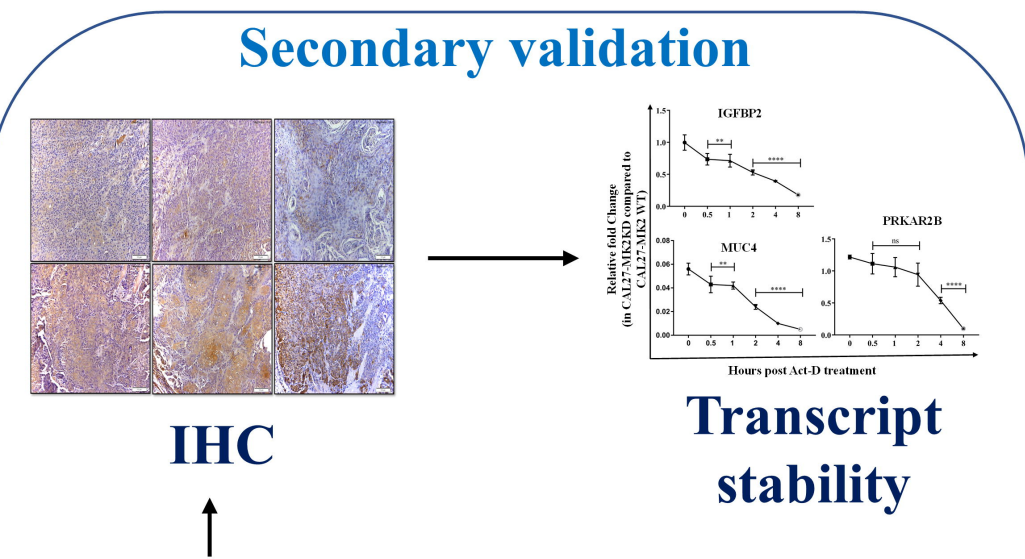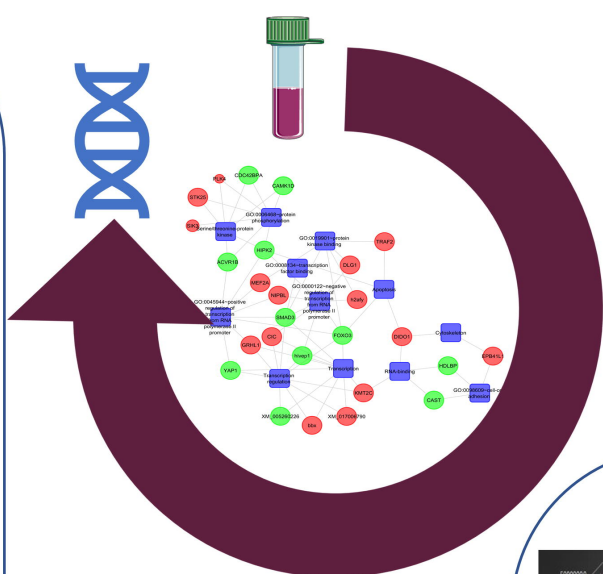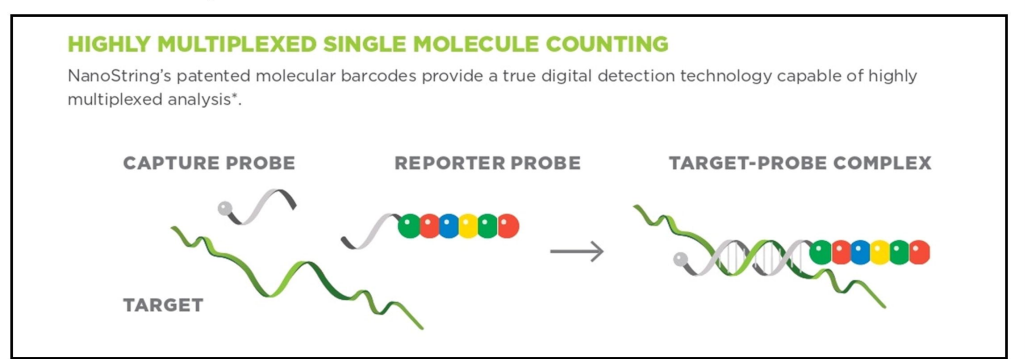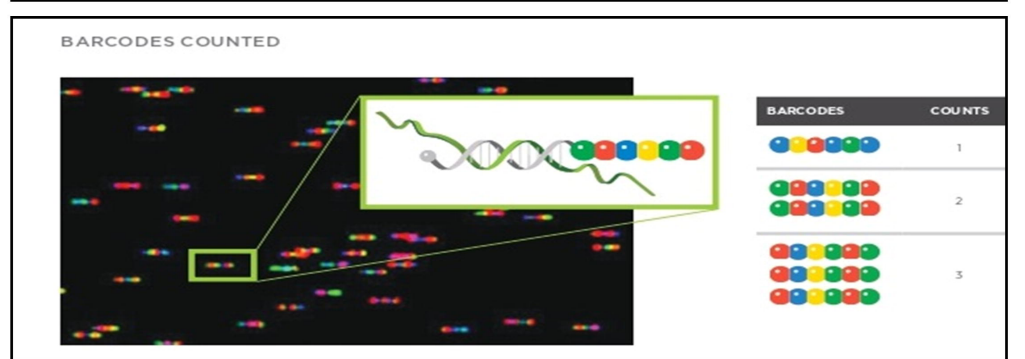

**Absolute transcript quantification by nCounter gene expression assay**

**Primary validation**

**86 Target genes**

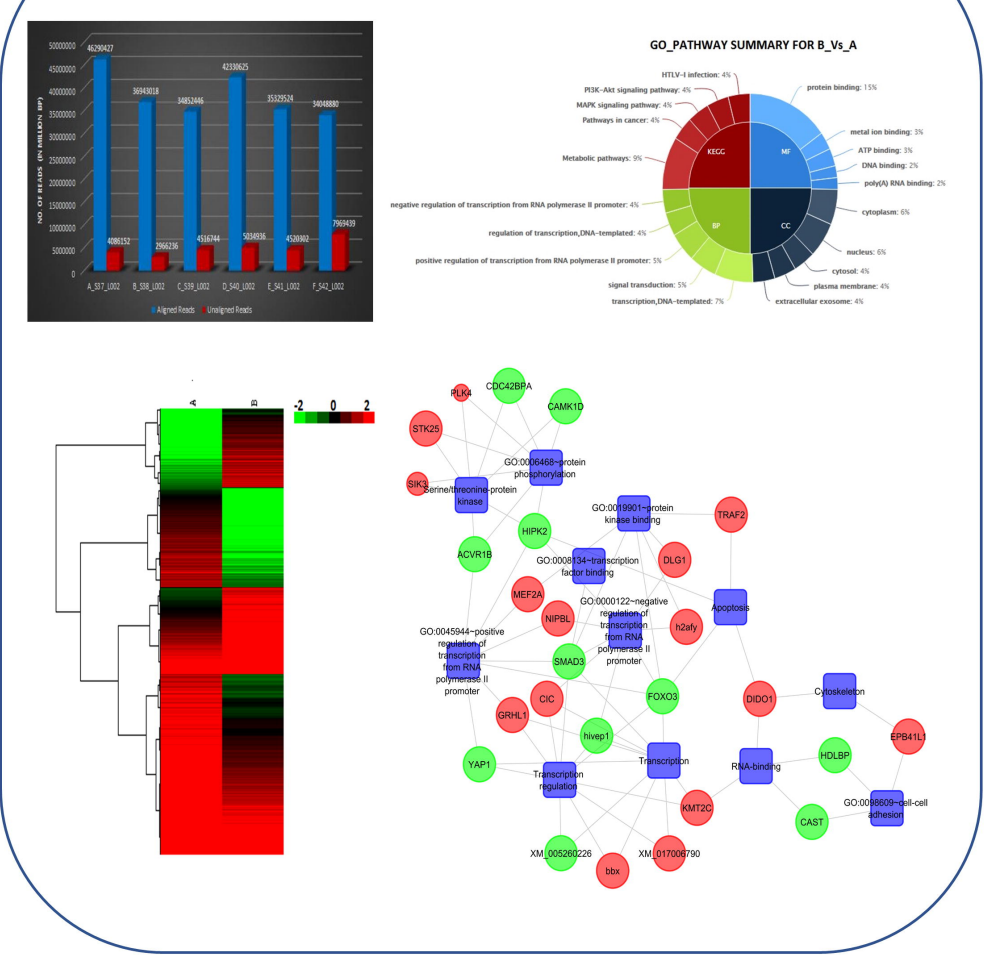

**RNaseq Dataset: A,B,C,D (Cell Line) and E & F (Xenograft)**

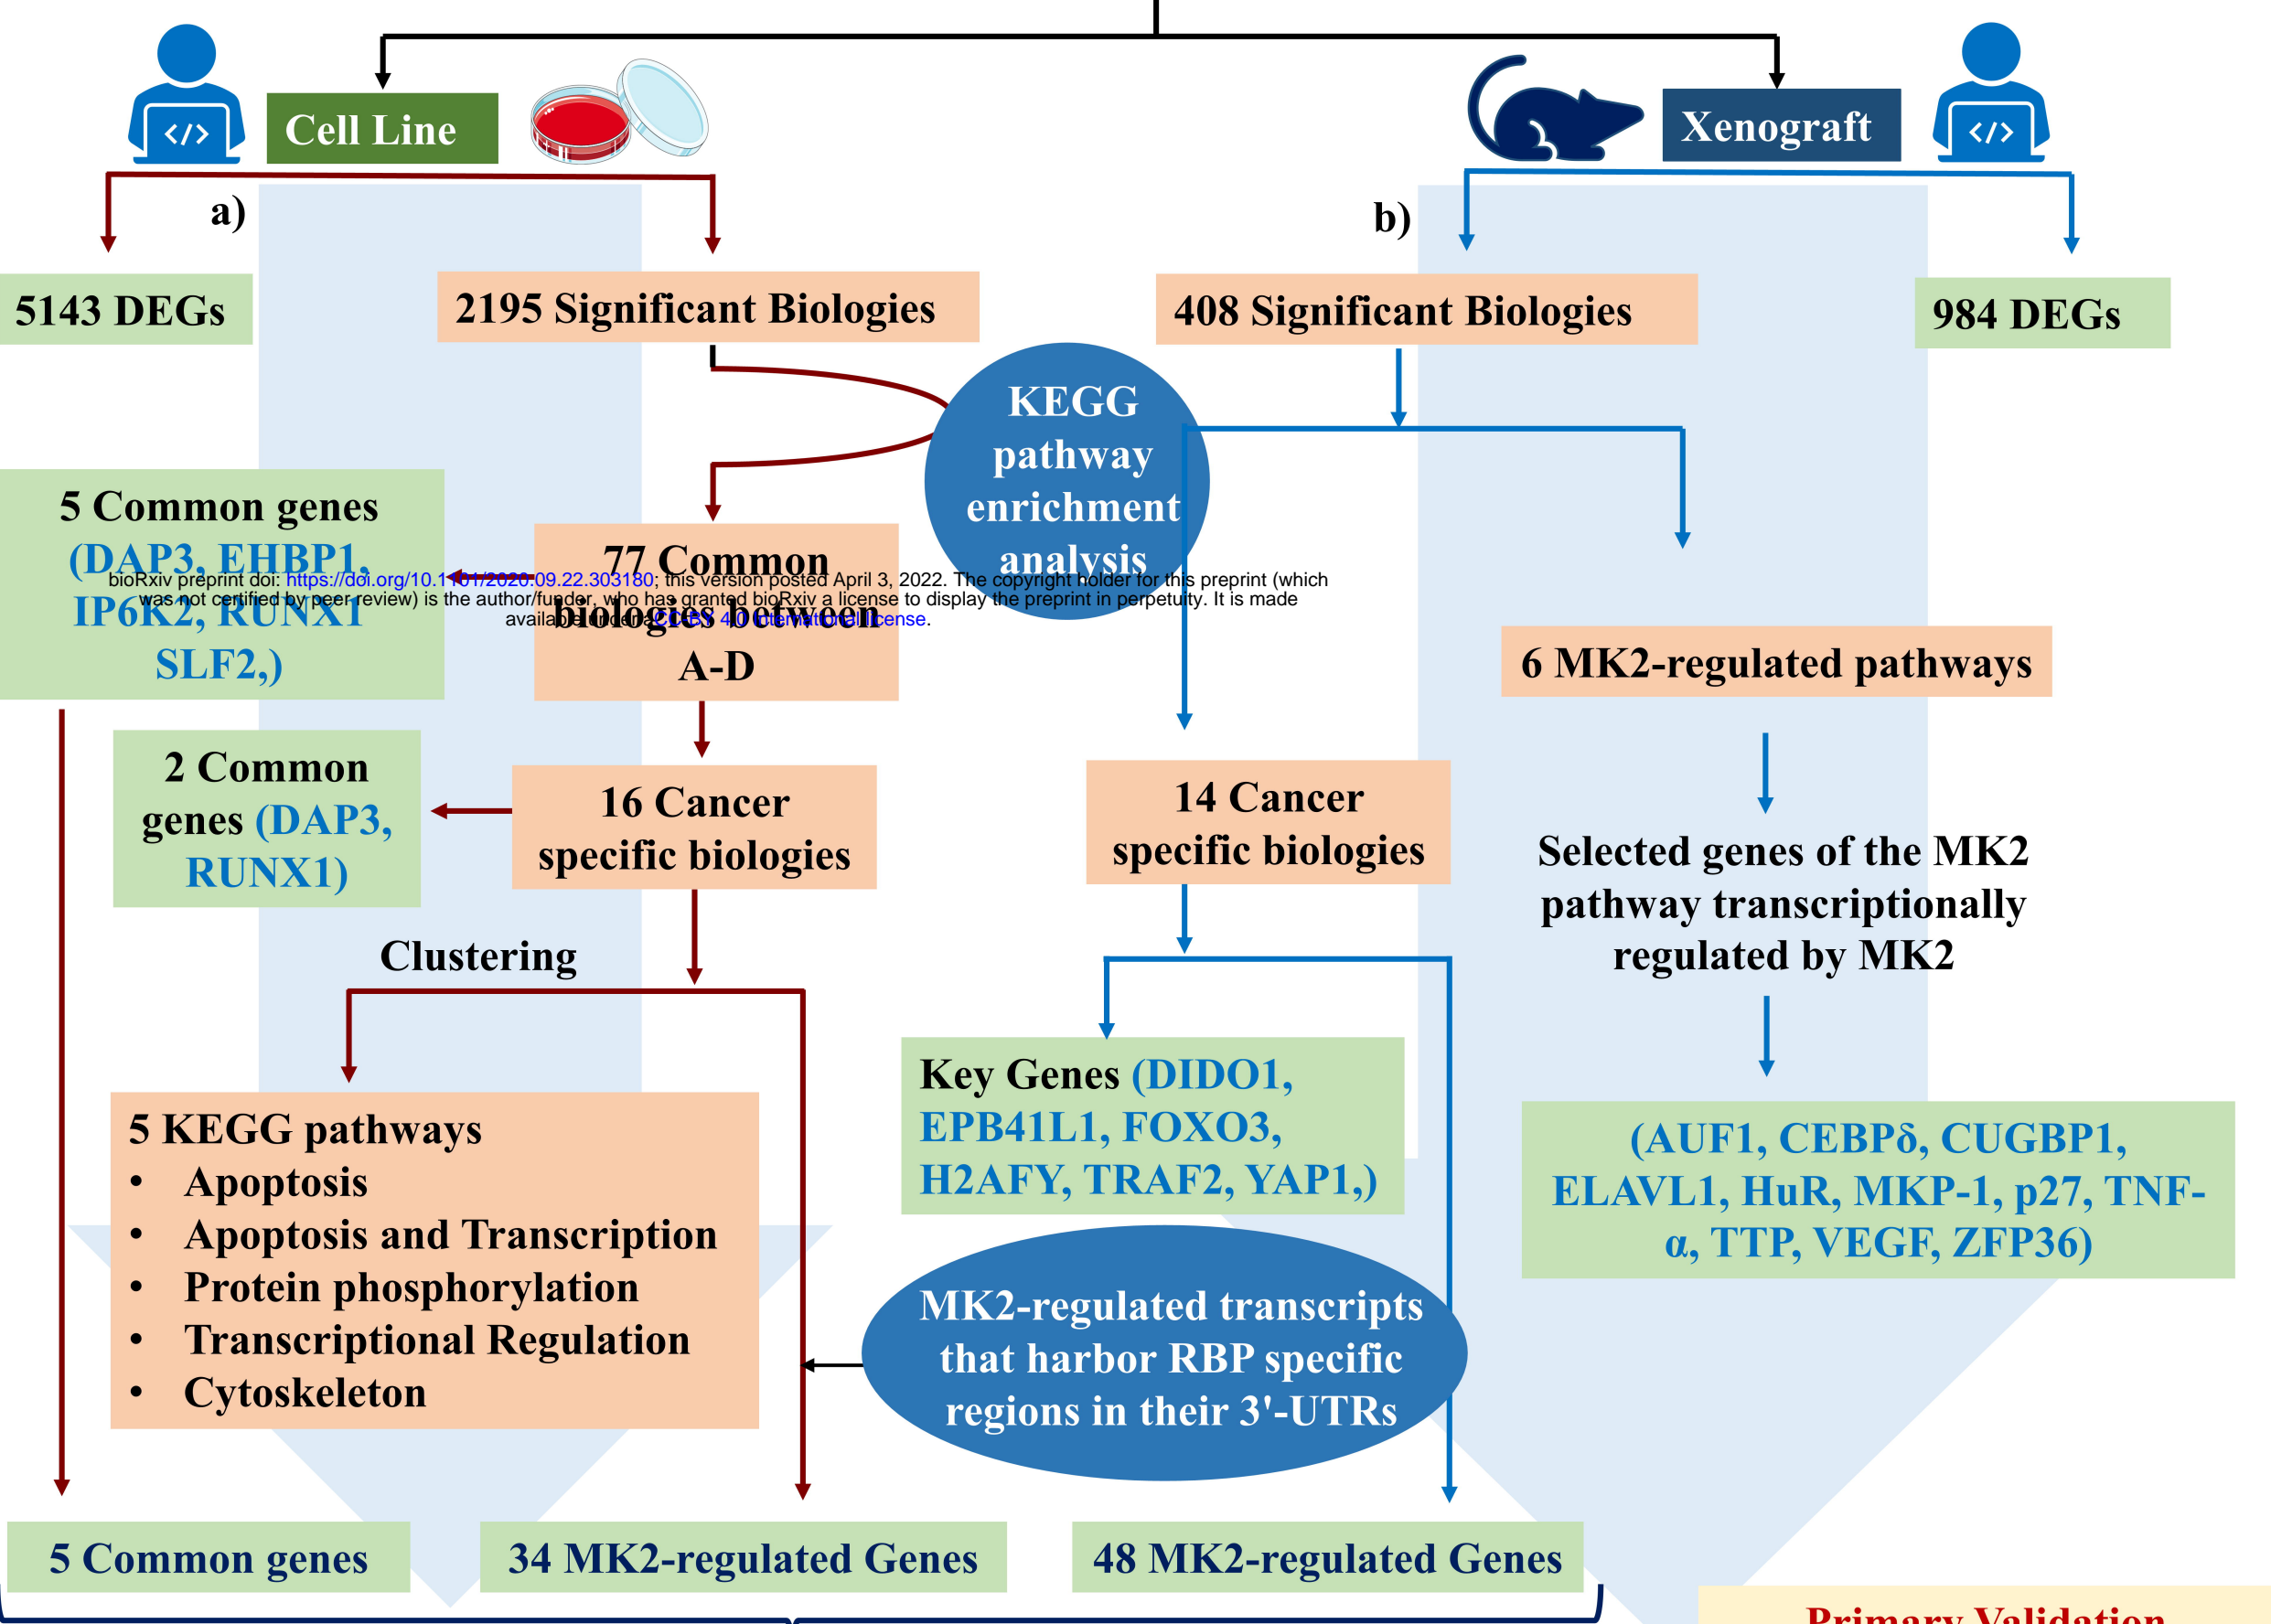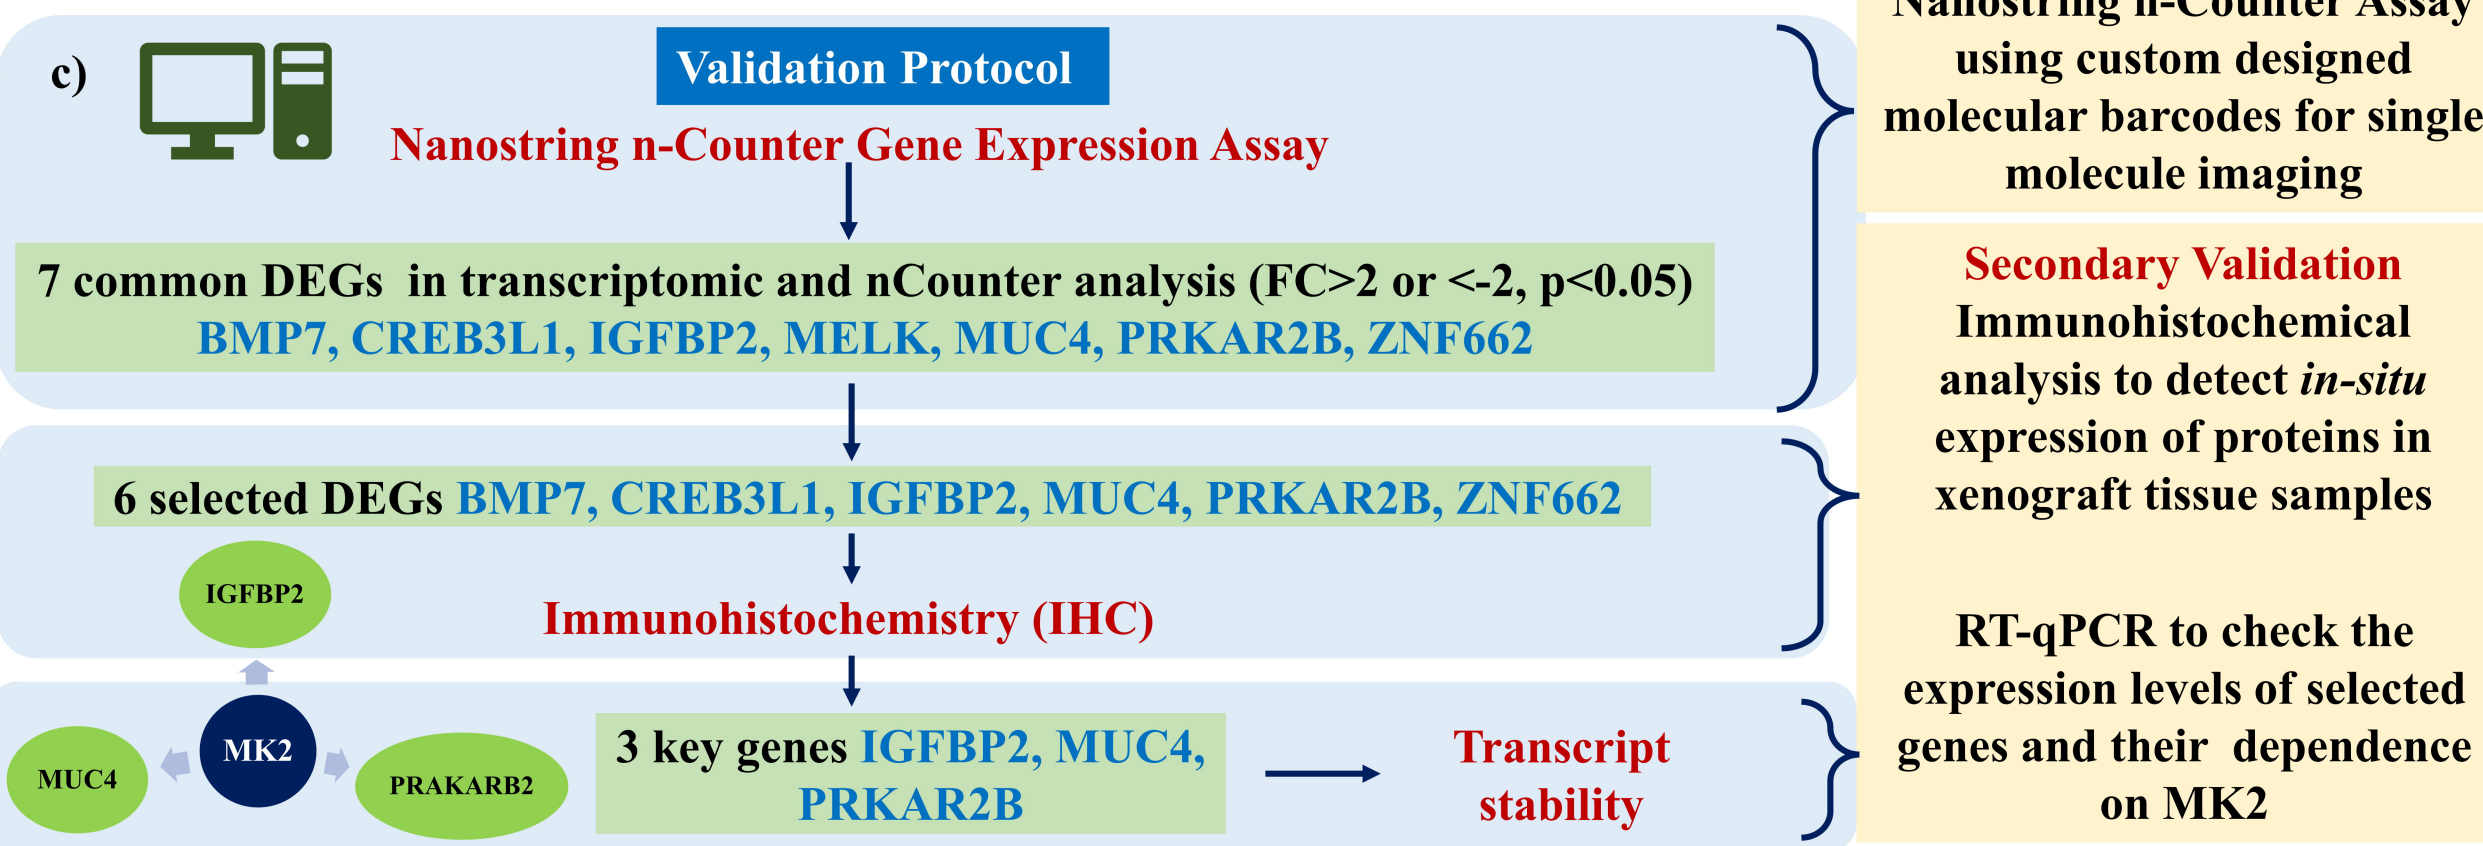

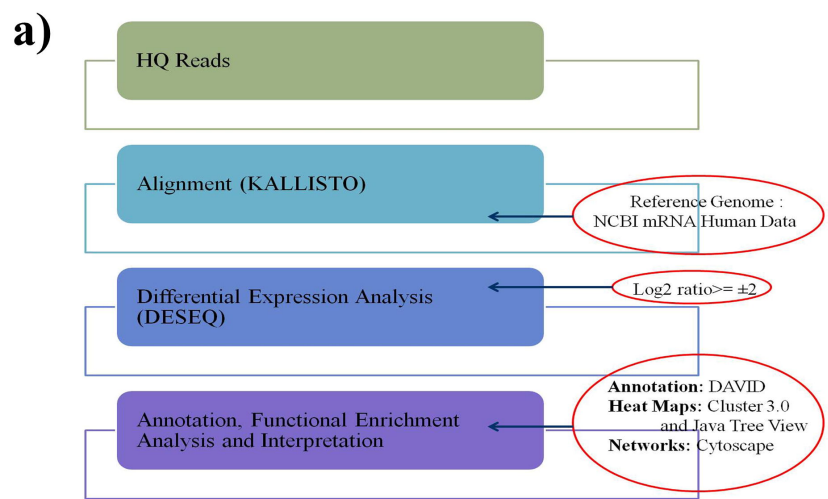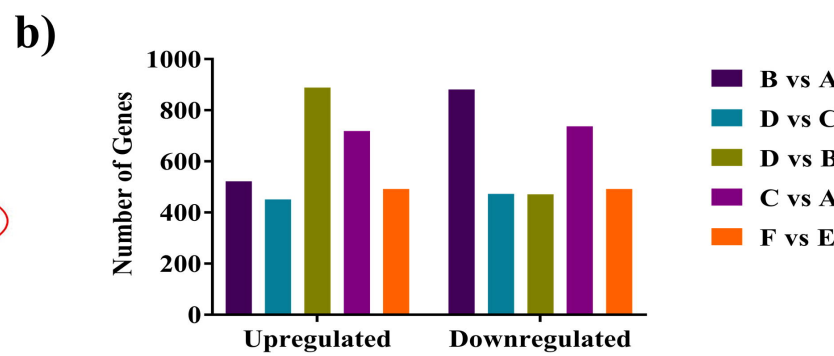

|      | B vs A | D vs C | D vs B | C vs A | F vs E |
|------|--------|--------|--------|--------|--------|
| Up   | 522    | 451    | 889    | 719    | 492    |
| Down | 881    | 473    | 471    | 737    | 492    |

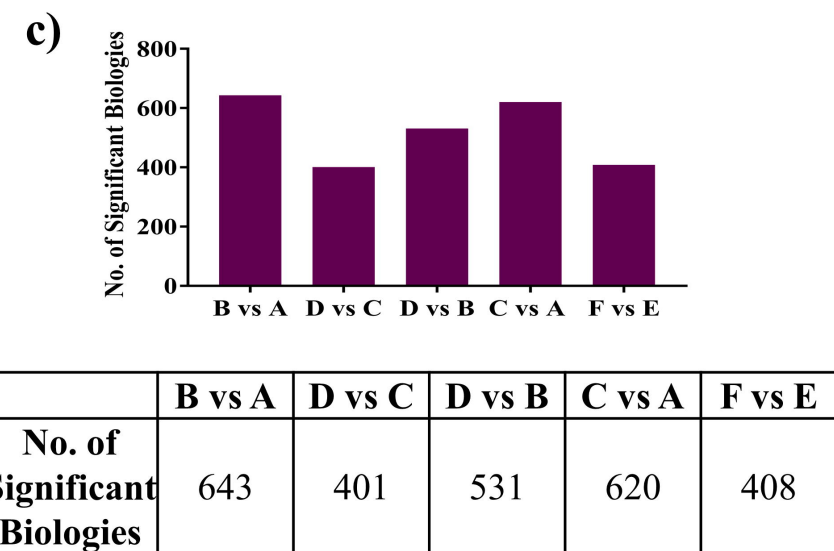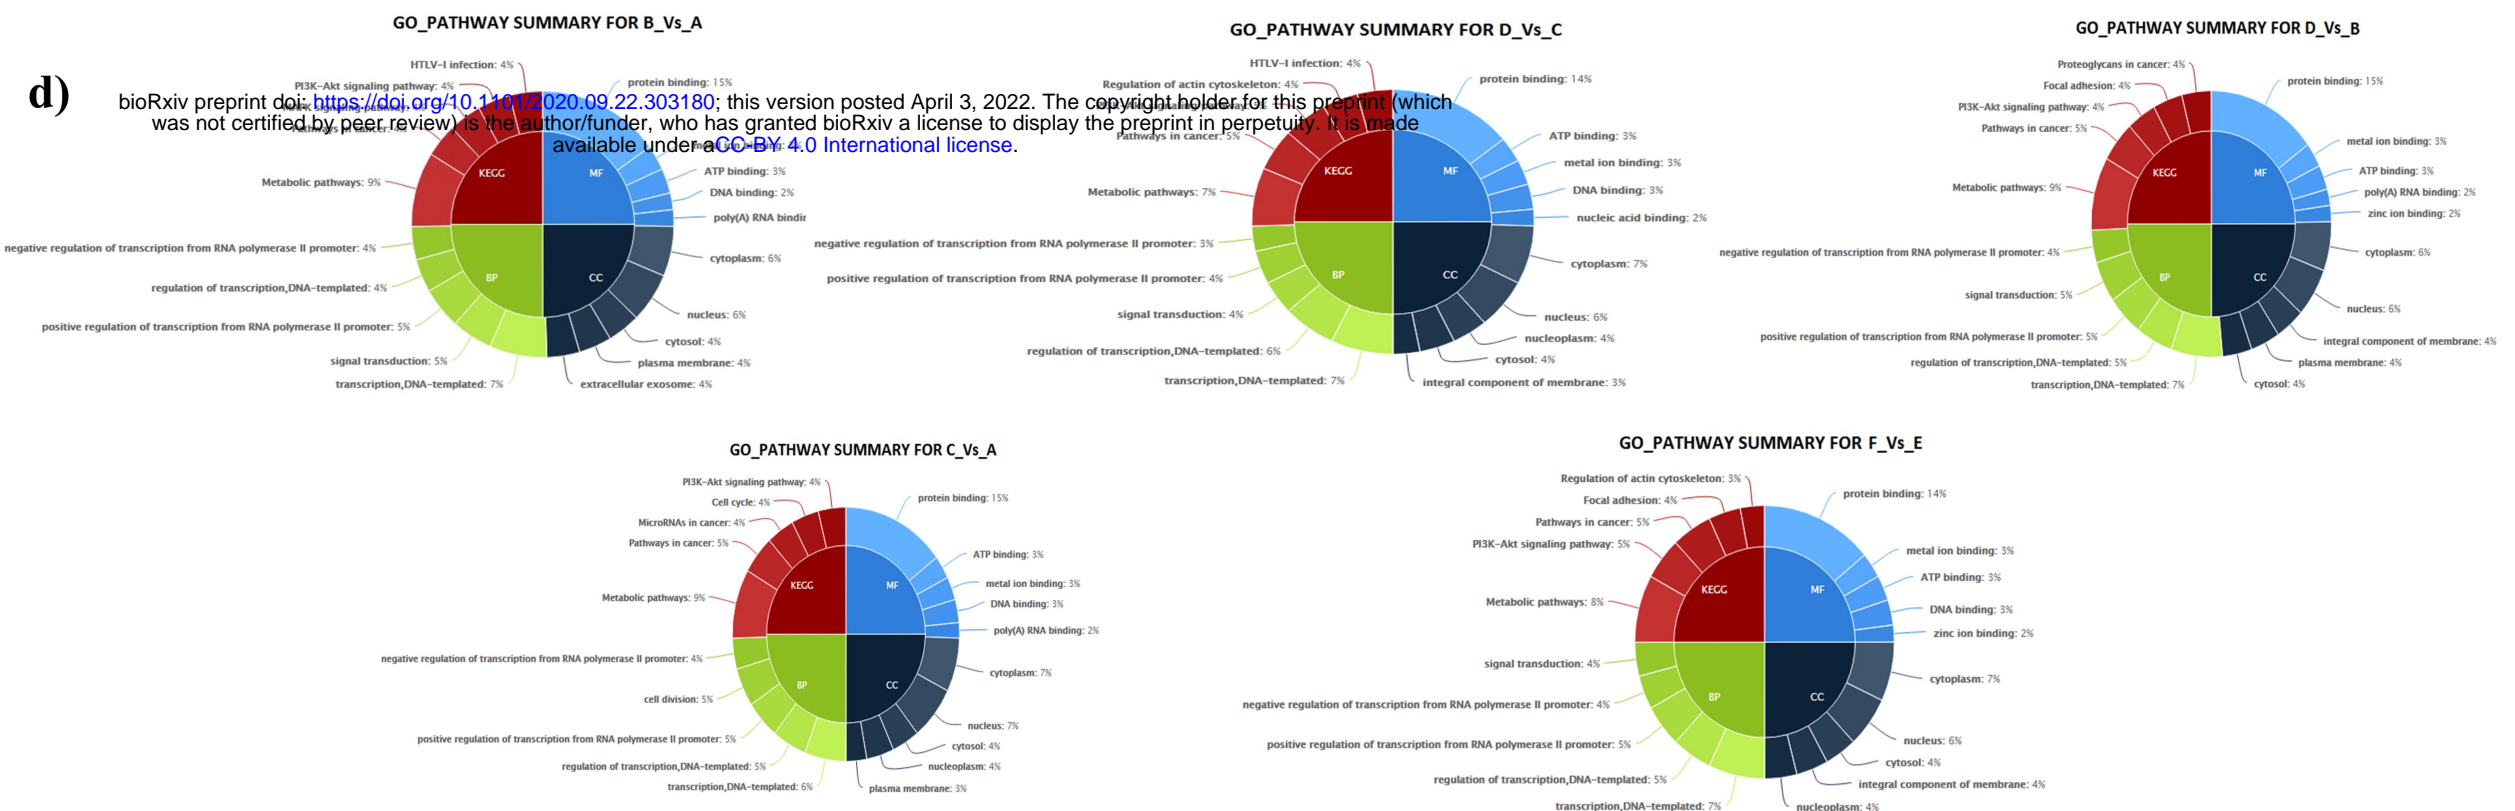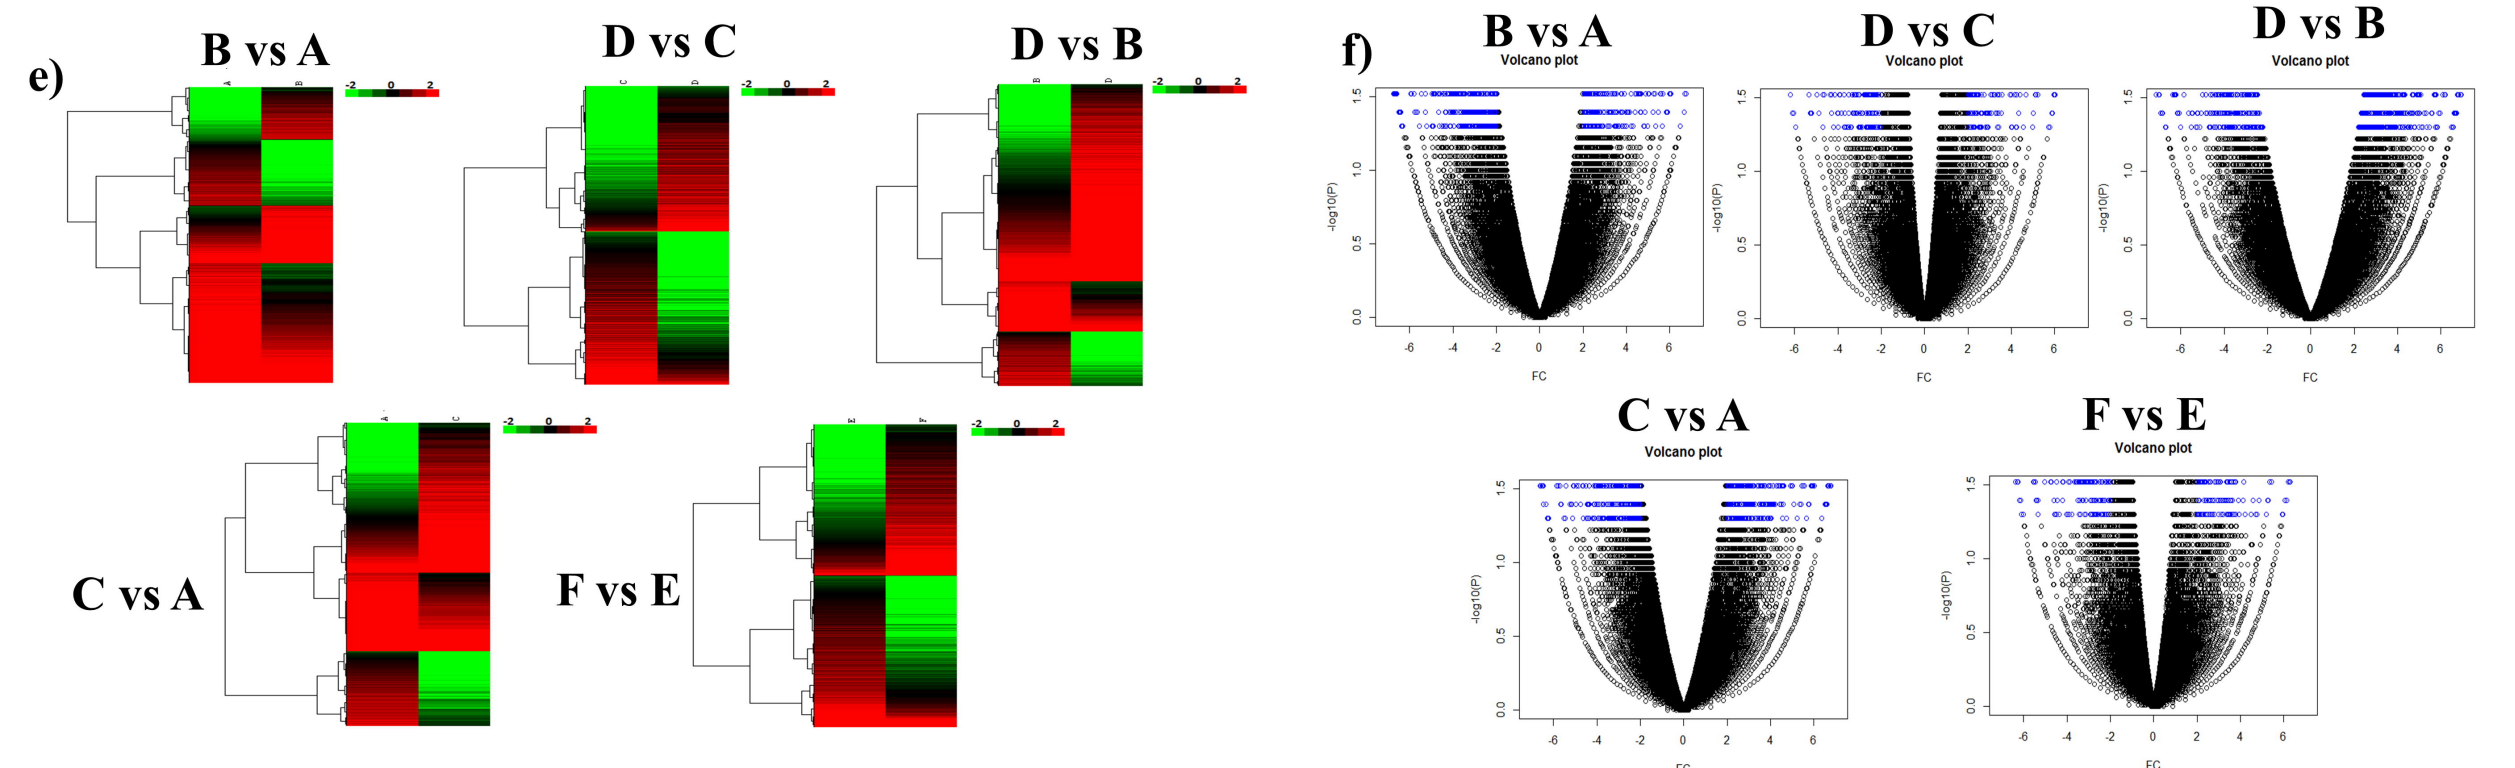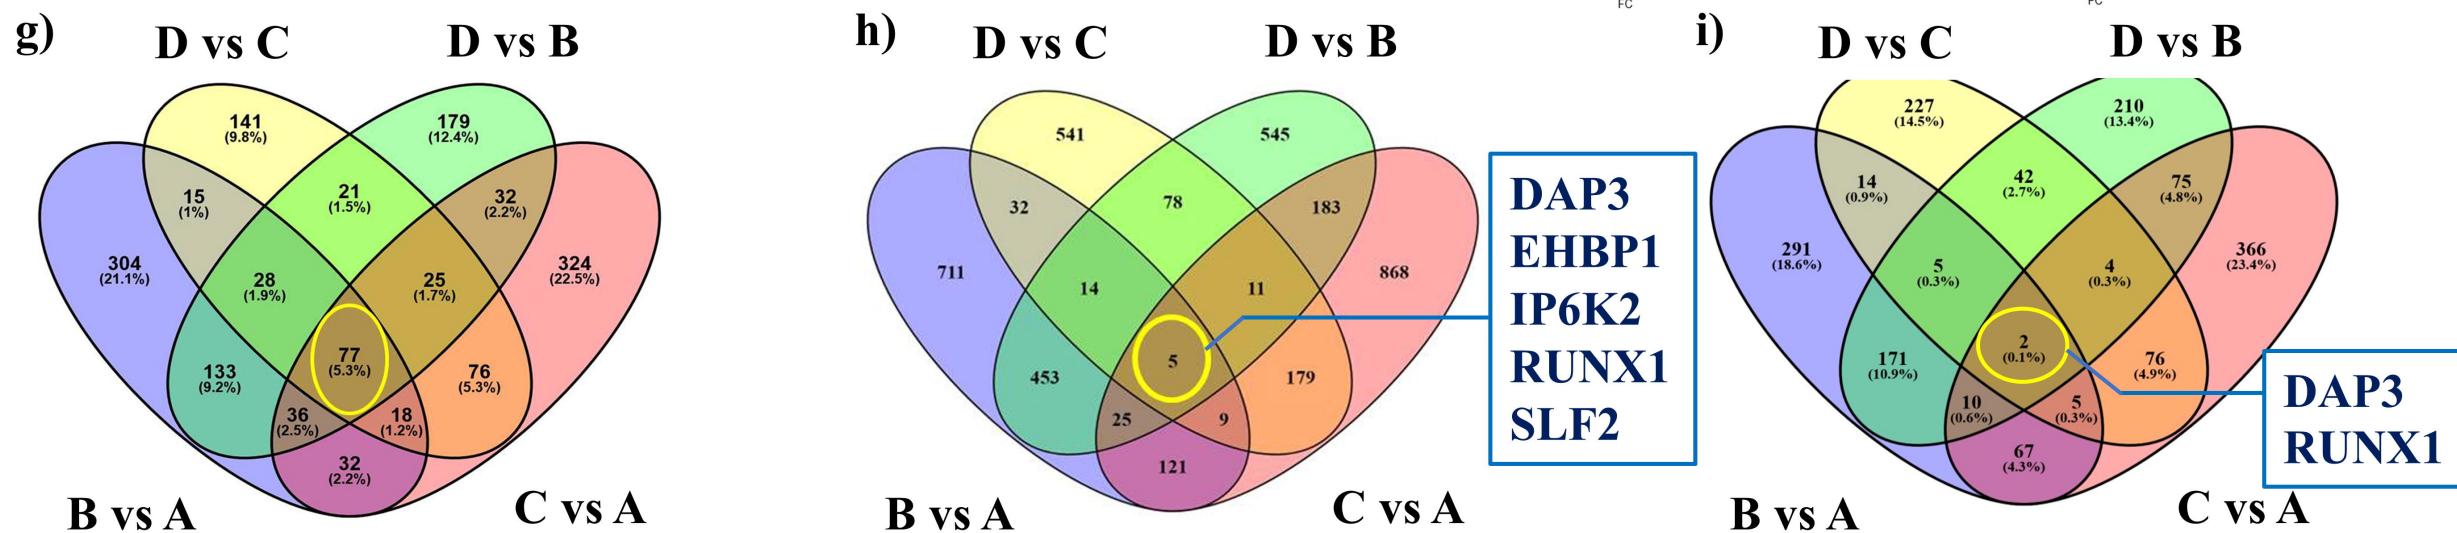

a)

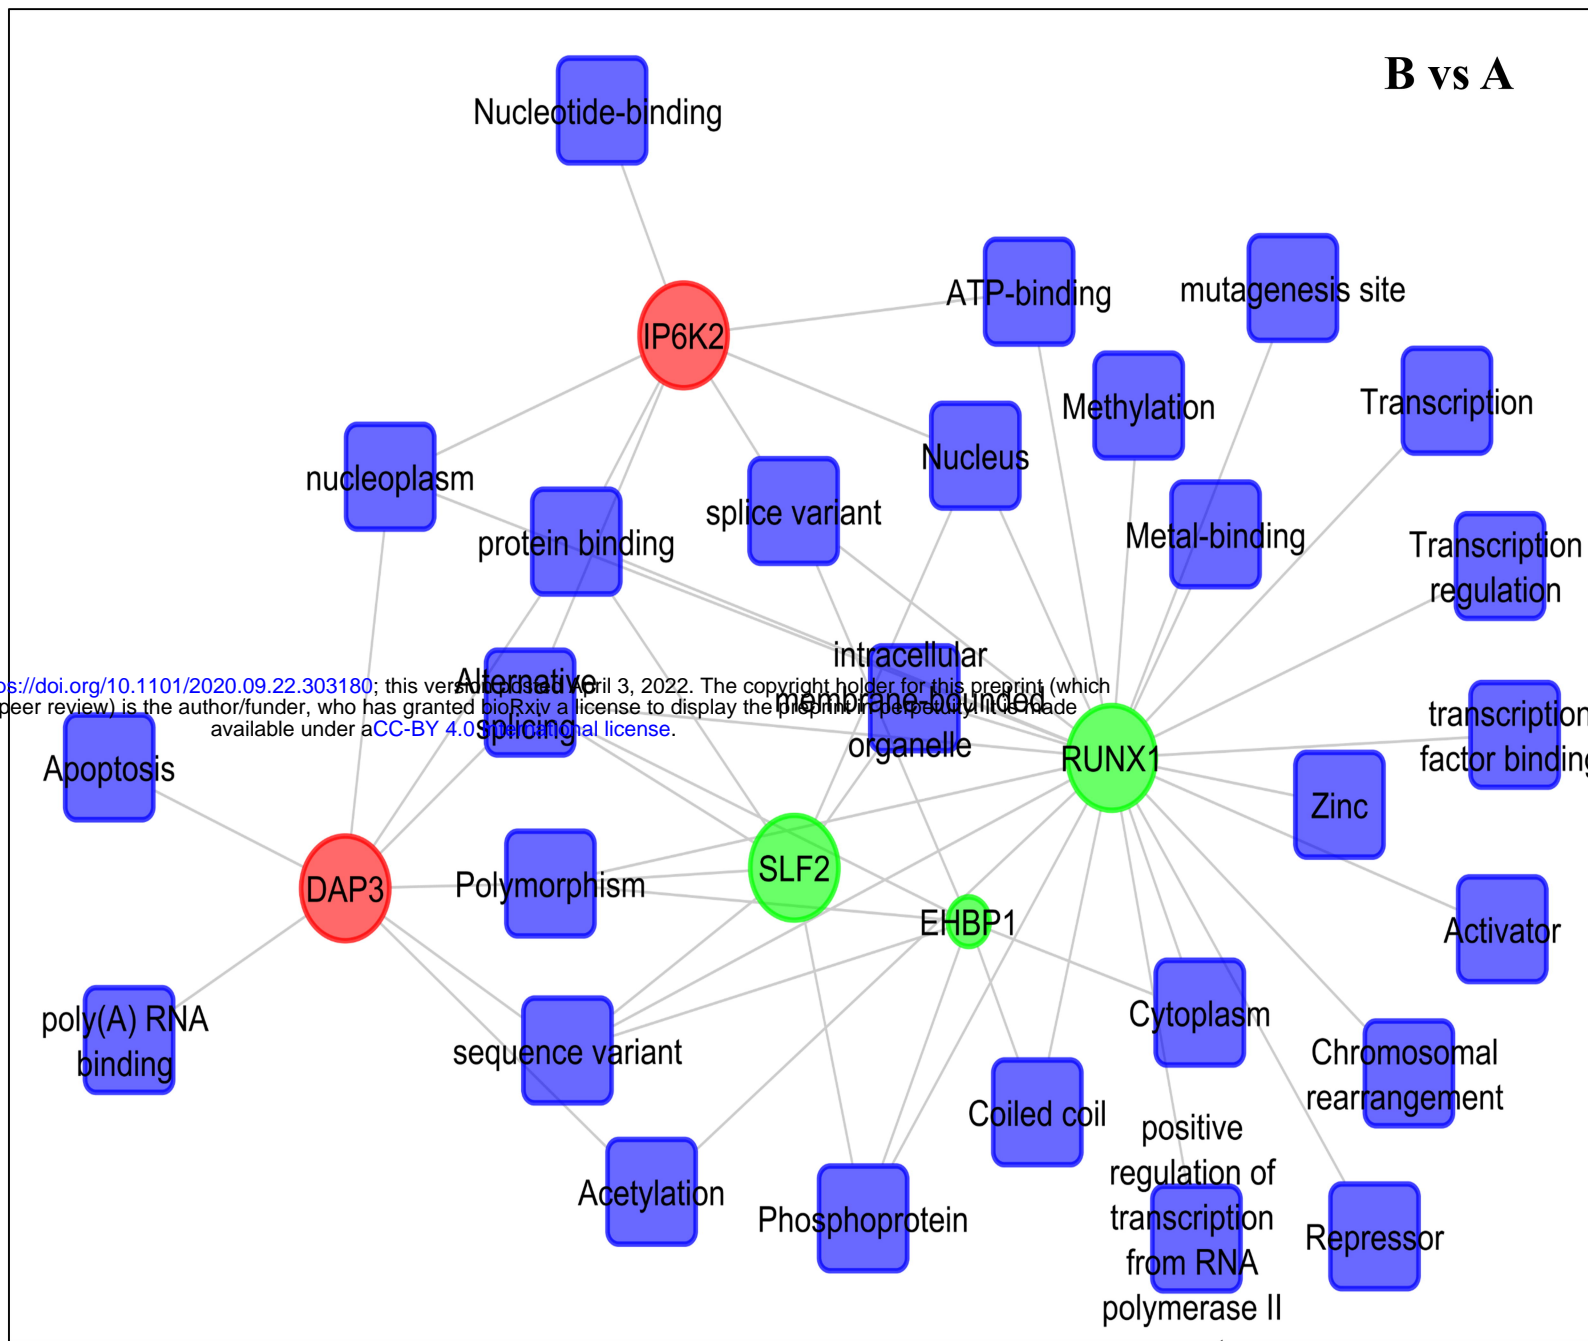

bioRxiv preprint doi: <https://doi.org/10.1101/2020.09.22.303180>; this version posted April 3, 2022. The copyright holder for this preprint (which was not certified by peer review) is the author/funder, who has granted bioRxiv a license to display the preprint in perpetuity. It is made available under aCC-BY 4.0 International license.

b)

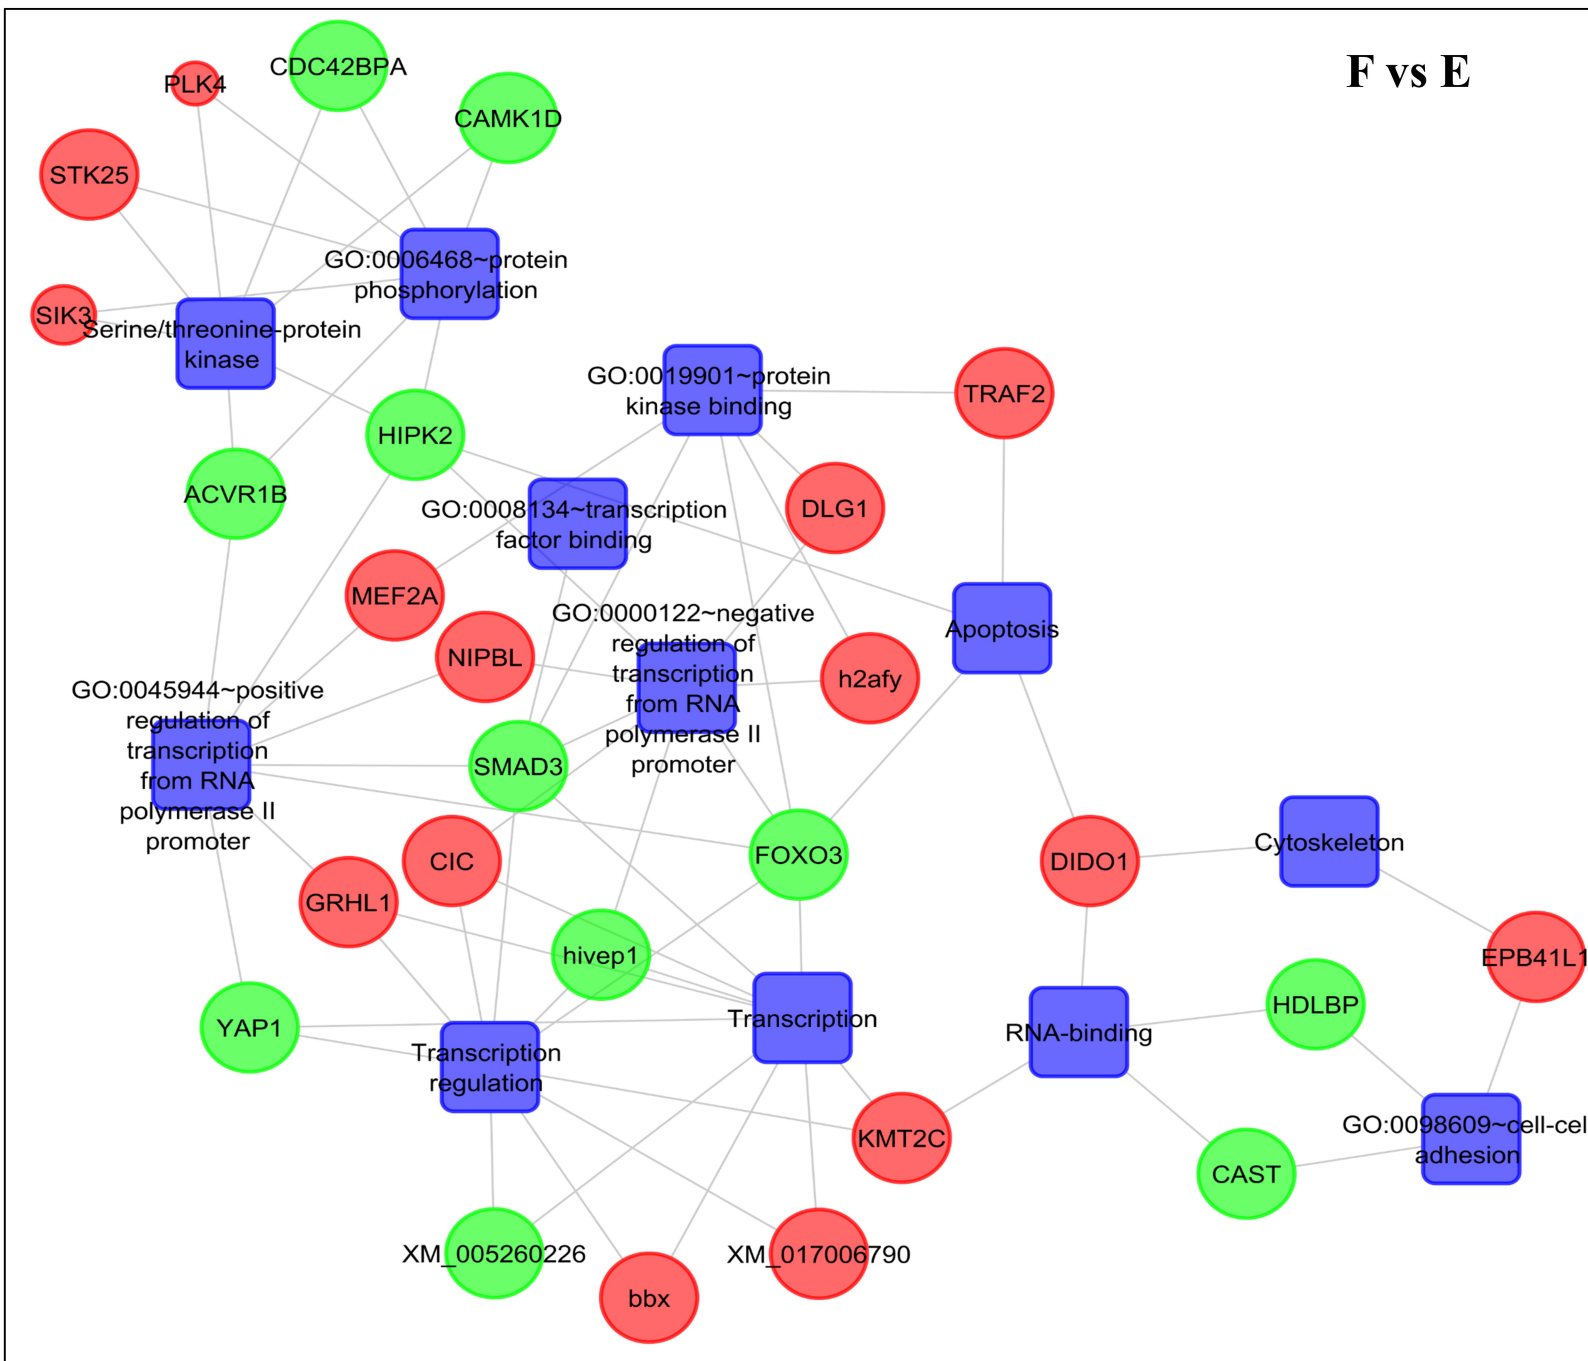

a)

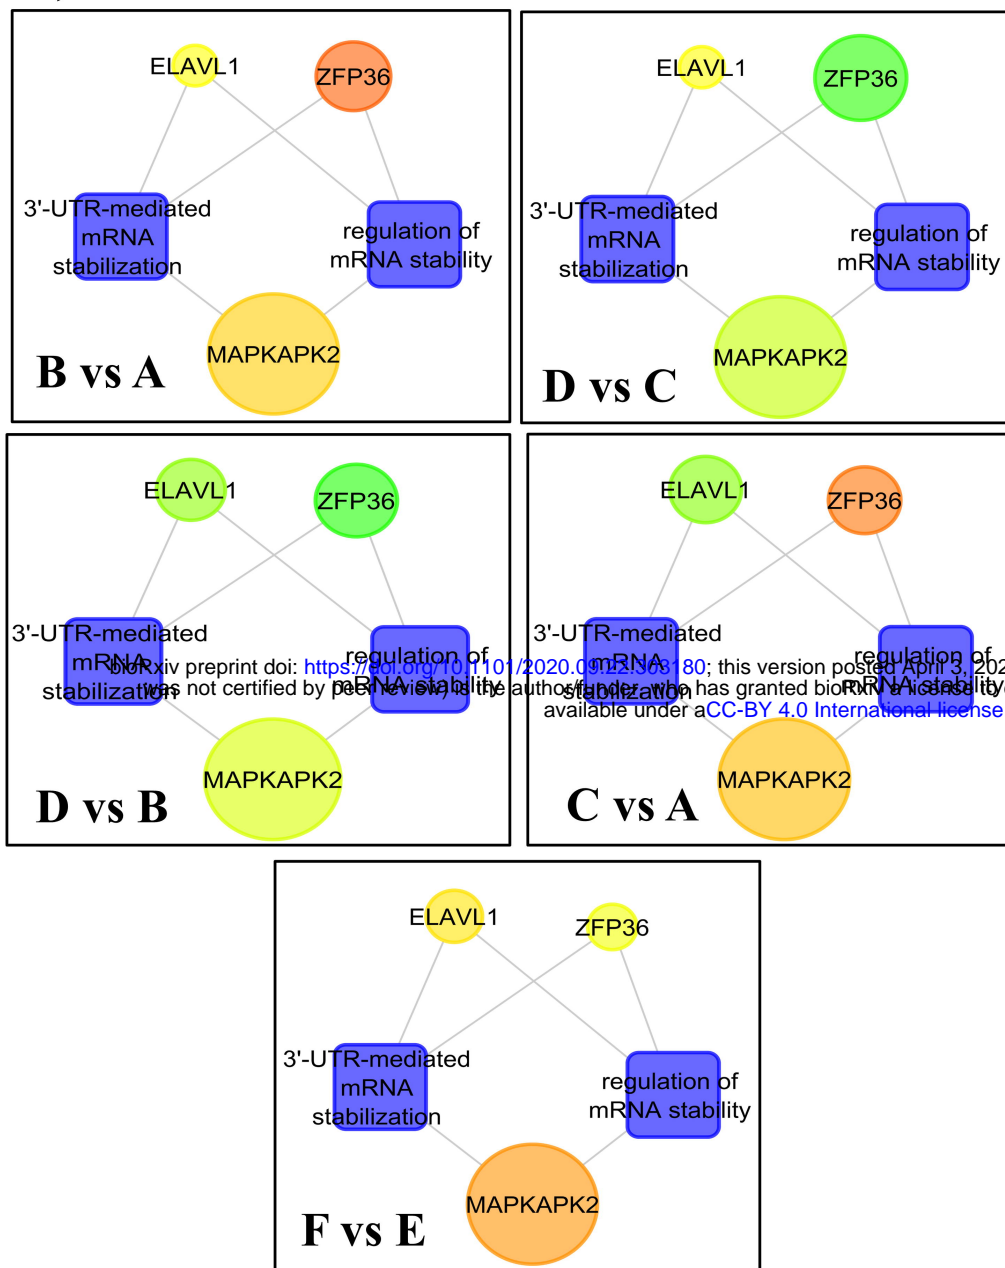

b)

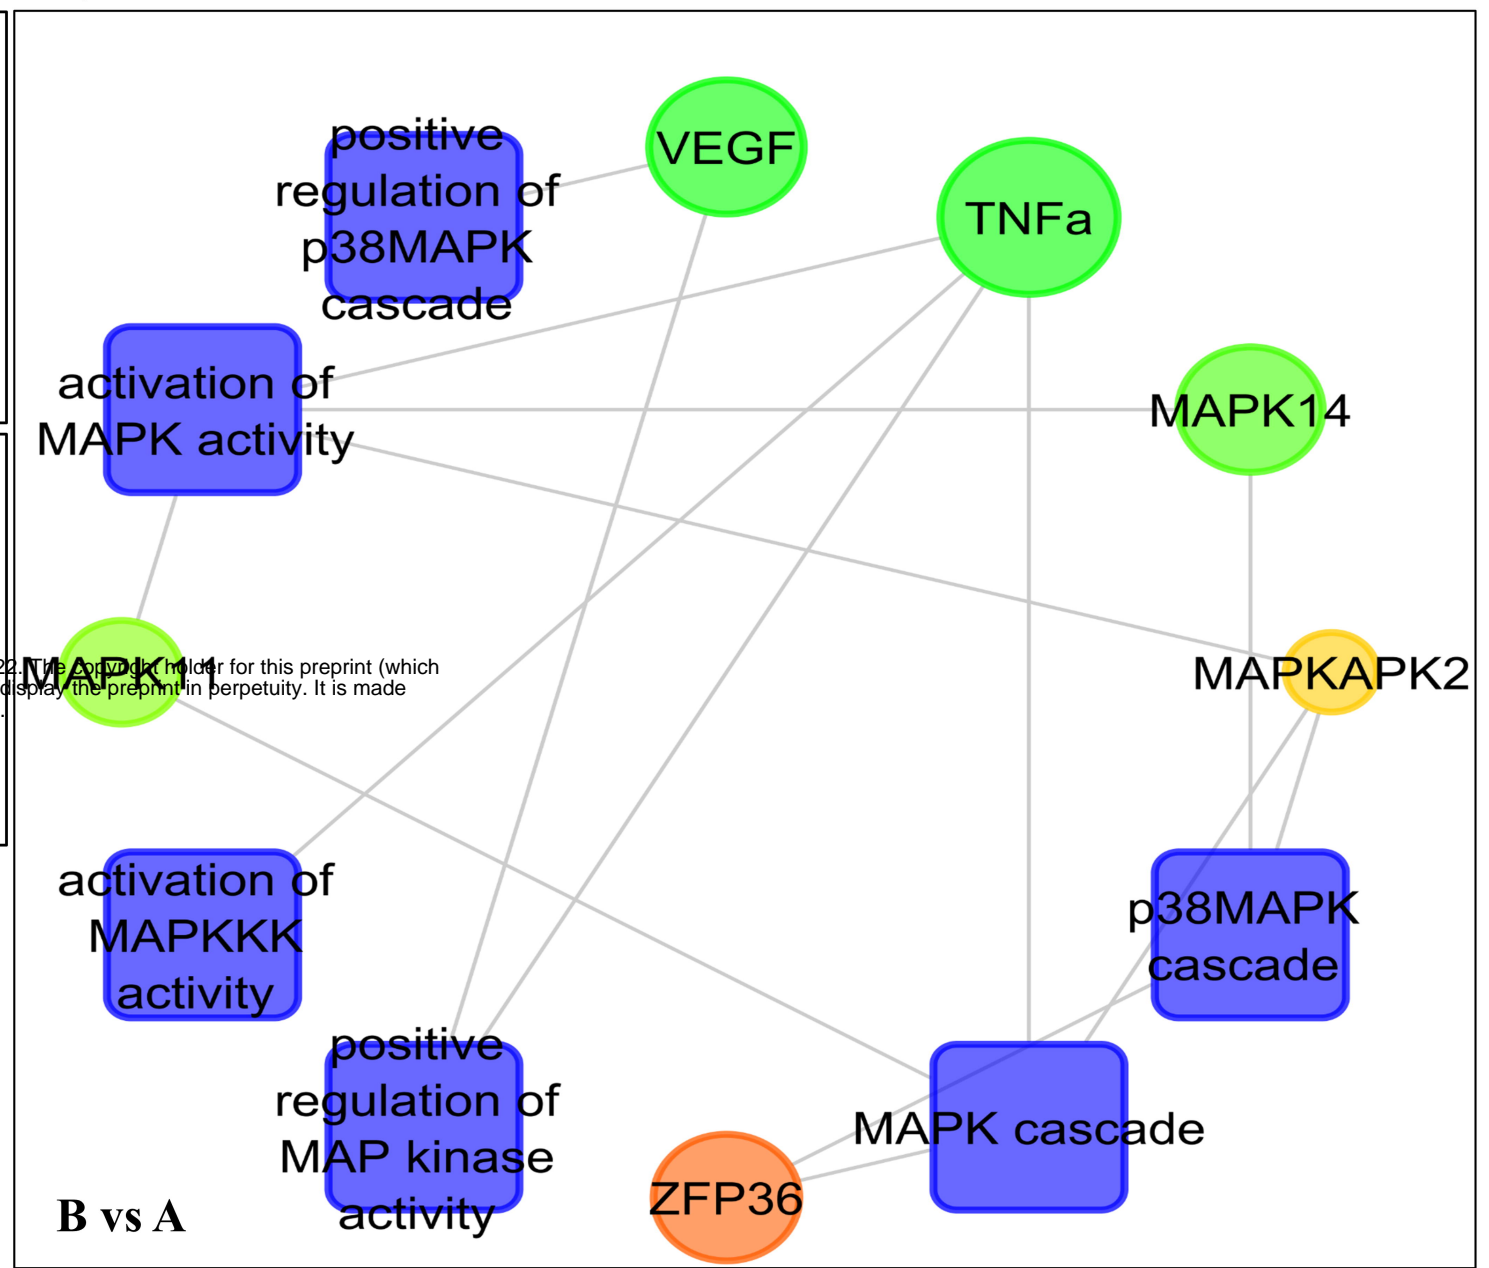

c)

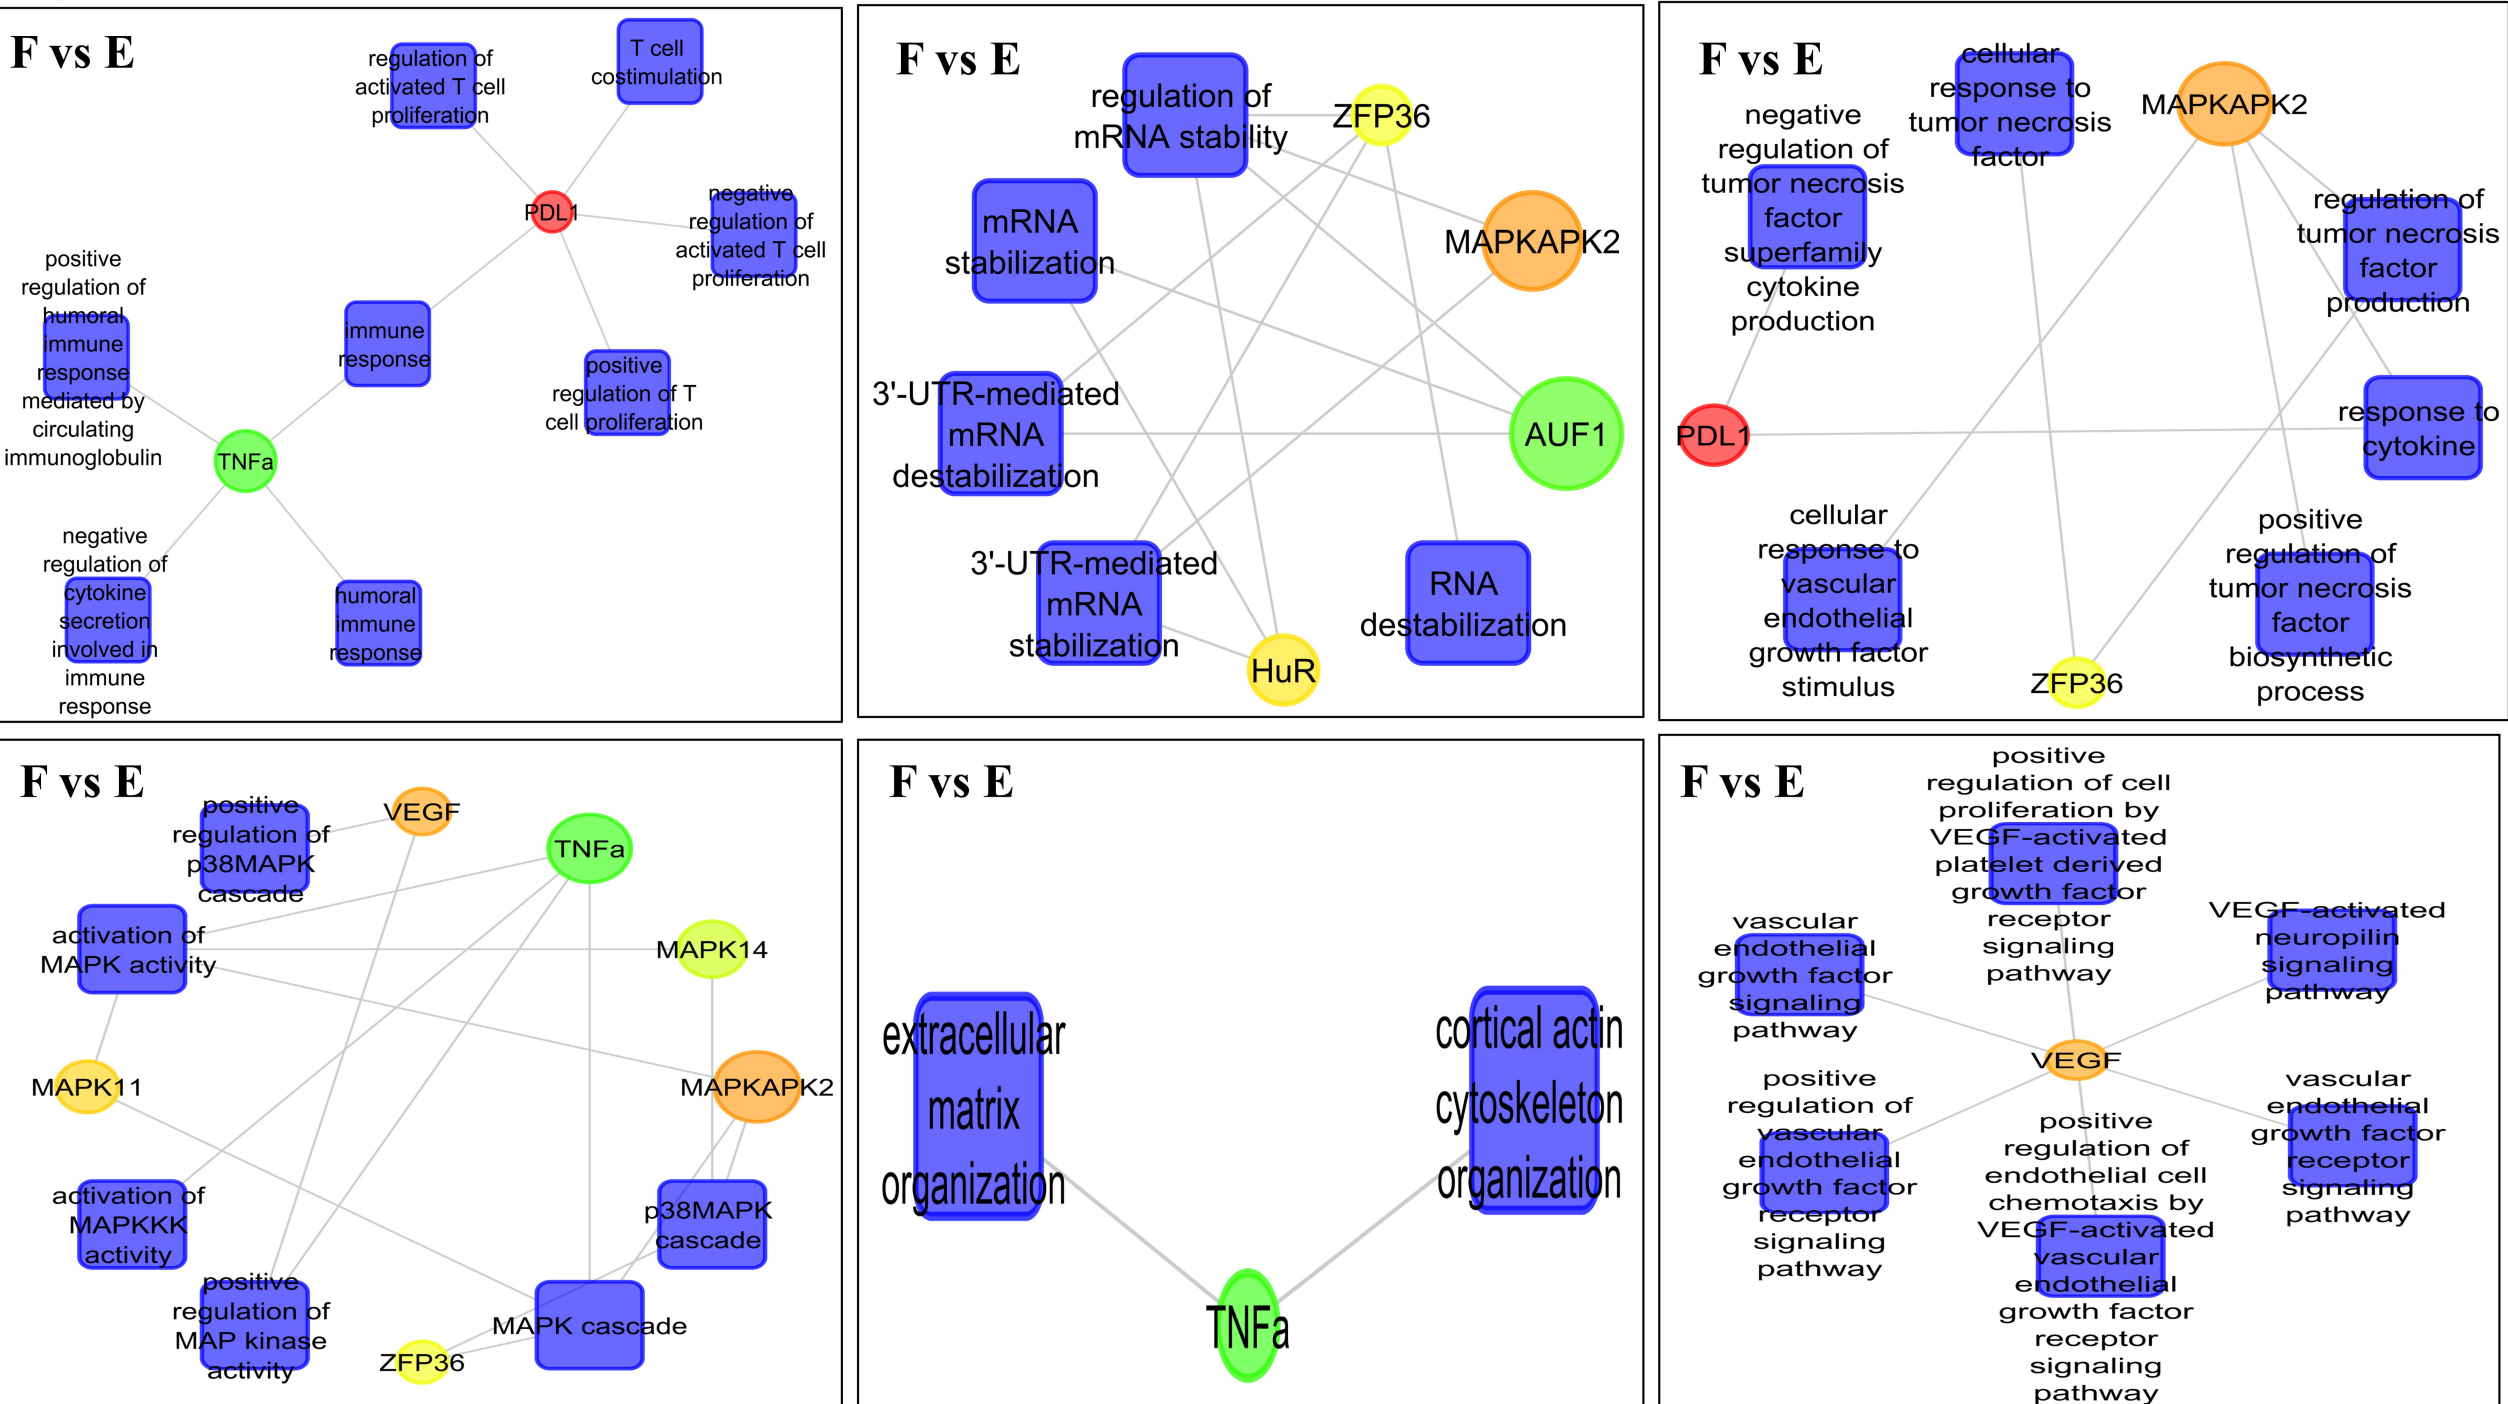

a)

Cell Line

16 Cancer specific biological processes

Xenograft

54 Cancer specific biological processes

- Found out the 3'-UTR regions of the transcripts.
- Found out the domain sequences of RBPs using CISBP-RNA Database
- Filtered out the transcripts that harbour RBP specific regions in their 3'-UTRs using RBPmap

MK2-regulated transcripts that harbor RBP specific regions in their 3'-UTRs

bioRxiv preprint doi: <https://doi.org/10.1101/2020.09.22.33180>; this version posted April 3, 2022. The copyright holder for this preprint (which was not certified by peer review) is the author/funder, who has granted bioRxiv a license to display the preprint in perpetuity. It is made available under aCC-BY 4.0 International license.

b)

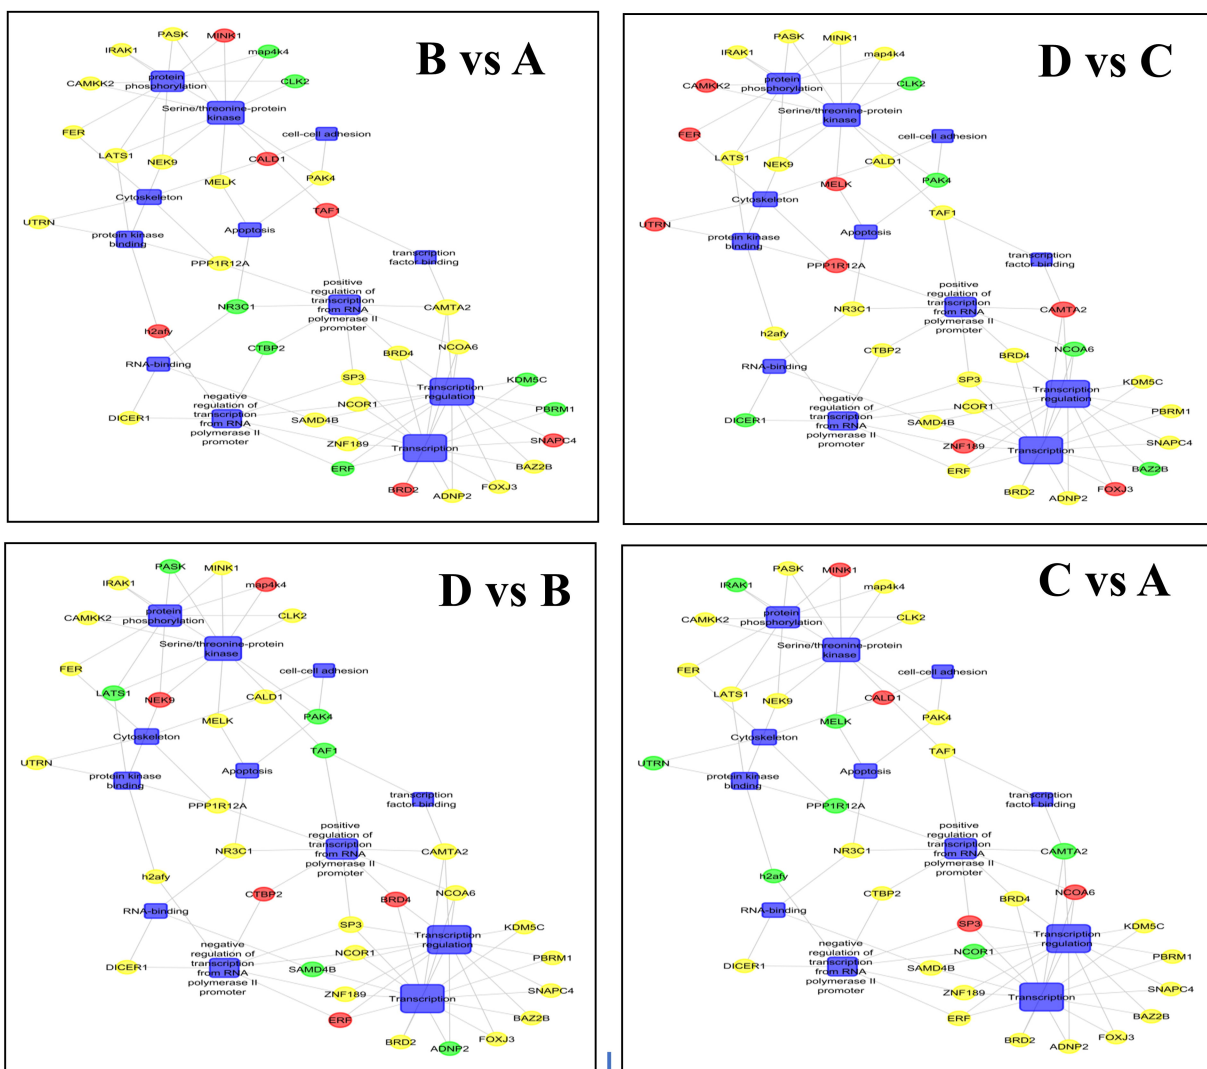

Cell Lines (A-D comparison)

34 MK2-regulated genes harboring RBP specific regions in their 3'-UTRs (Listed in Table 2)

c)

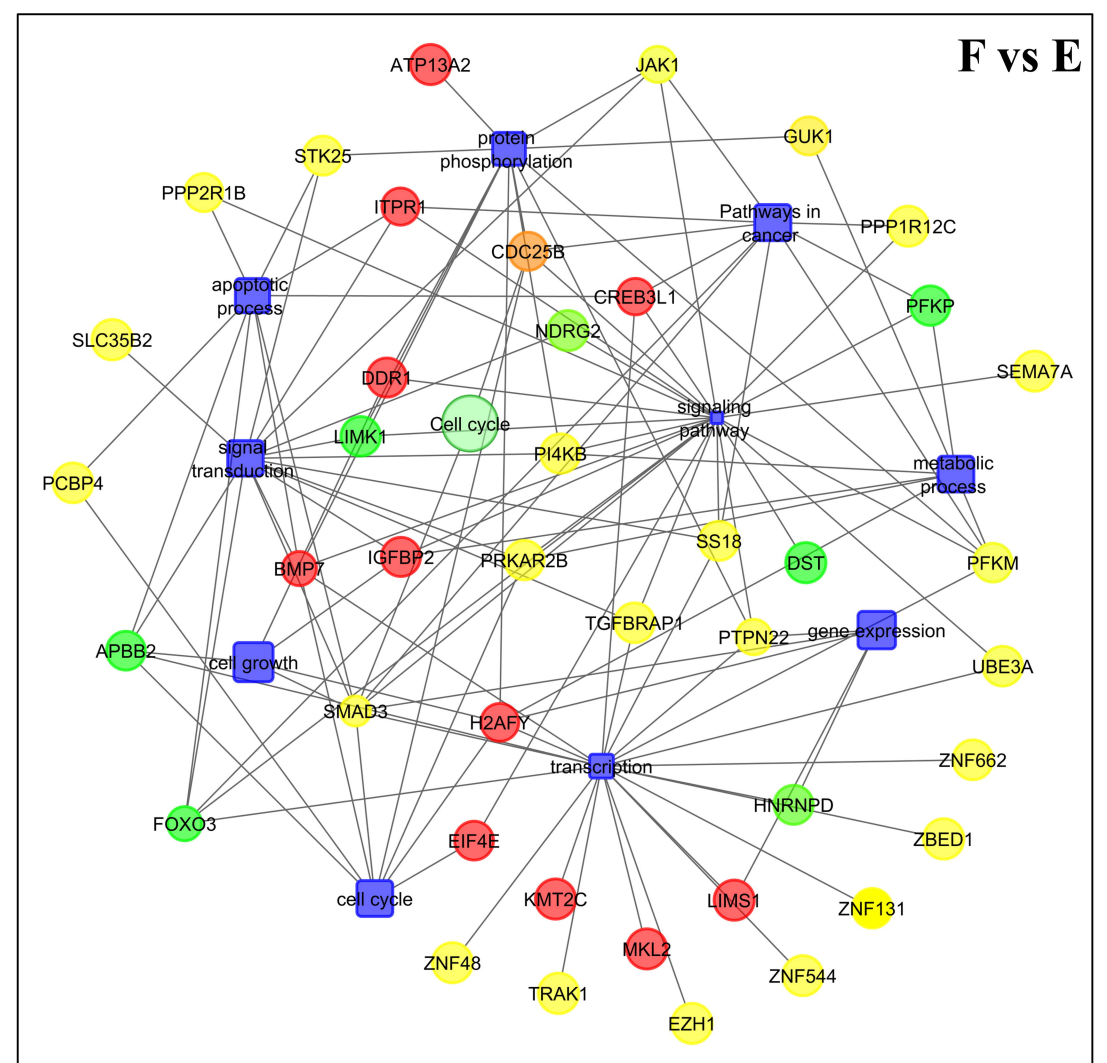

Xenograft tumor (F vs E comparison)

48 MK2-regulated genes harboring RBP specific regions in their 3'-UTRs (Listed in Table 3)



a)

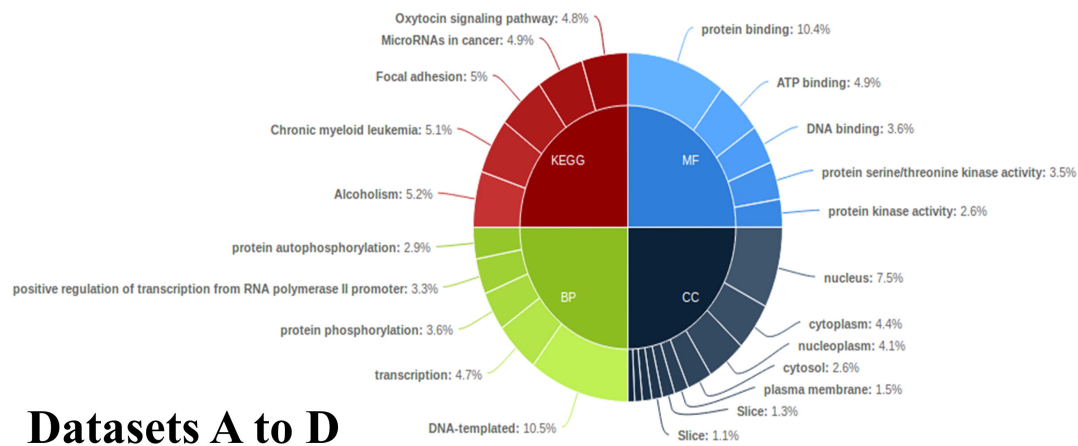

b)

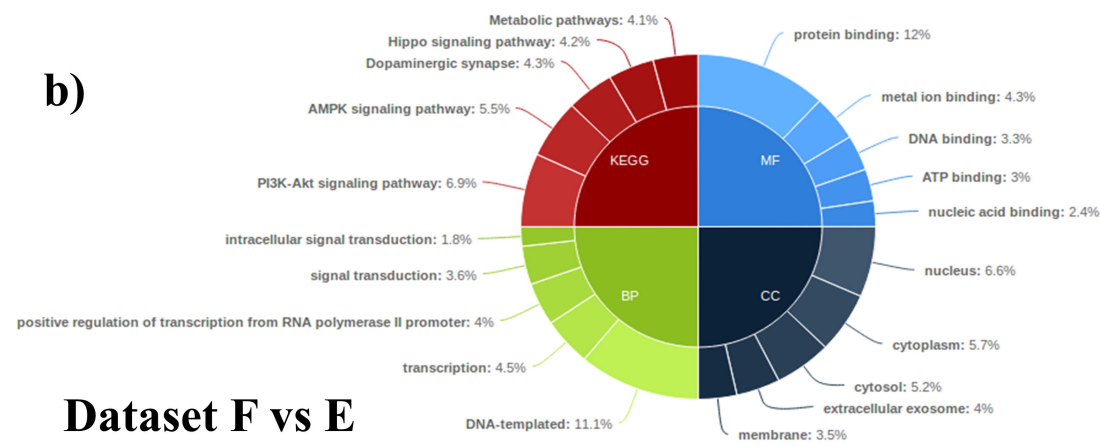

c)

bioRxiv preprint doi: <https://doi.org/10.1101/2020.09.22.303180>; this version posted April 3, 2022. The copyright holder for this preprint (which was not certified by peer review) is the author/funder, who has granted bioRxiv a license to display the preprint in perpetuity. It is made available under aCC-BY 4.0 International license.

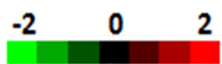

Dataset D

Dataset C

Dataset F

Dataset E

Dataset B

Dataset A

**IGFBP2**  
**PRKAR2B**  
**MUC4**  
**MELK**  
**ZNF662**  
**BMP7**  
**CREB3L1**

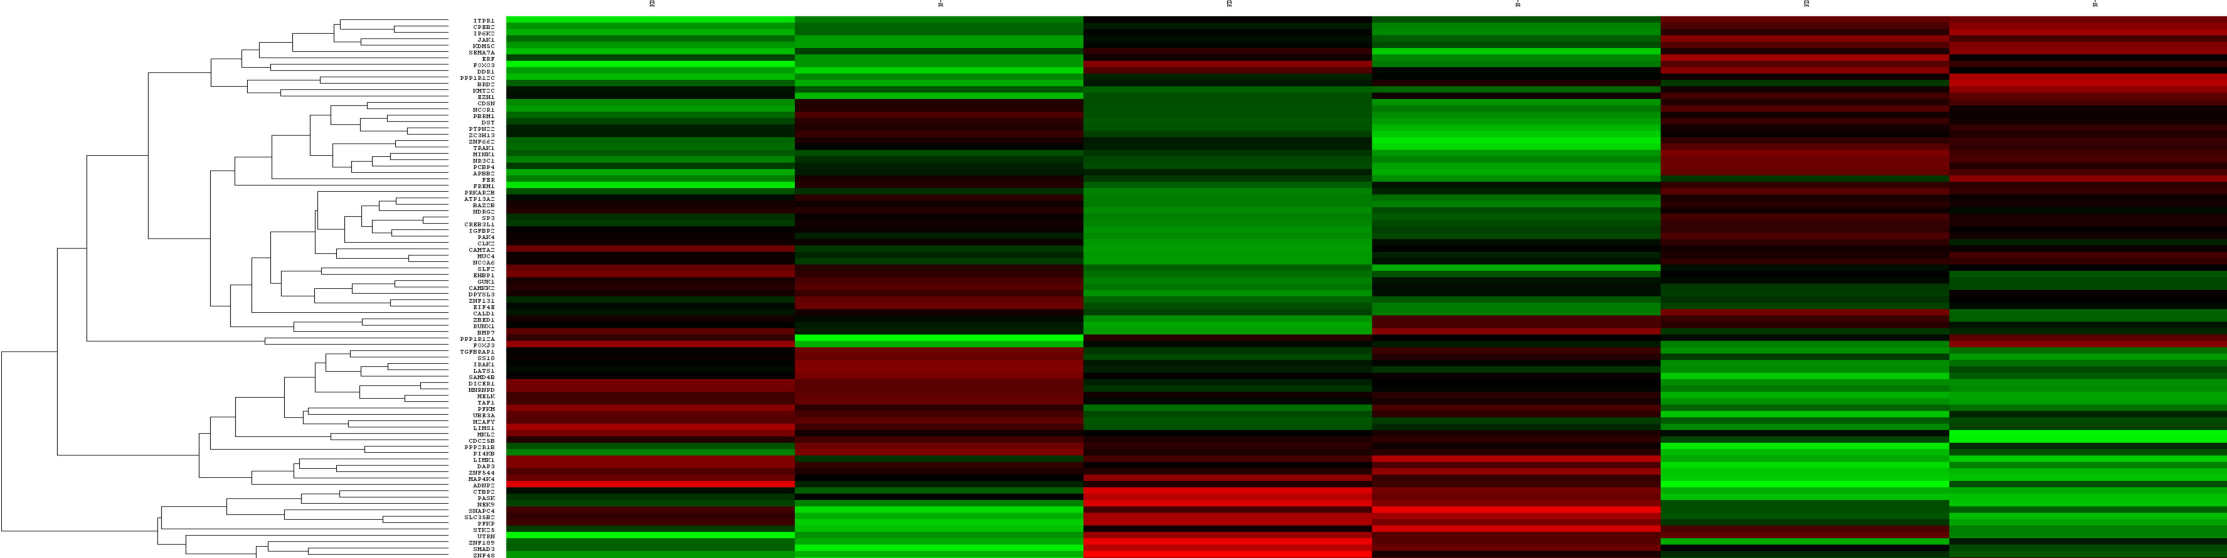

d)

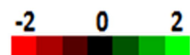

B vs A

D vs C

D vs B

C vs A

F vs E

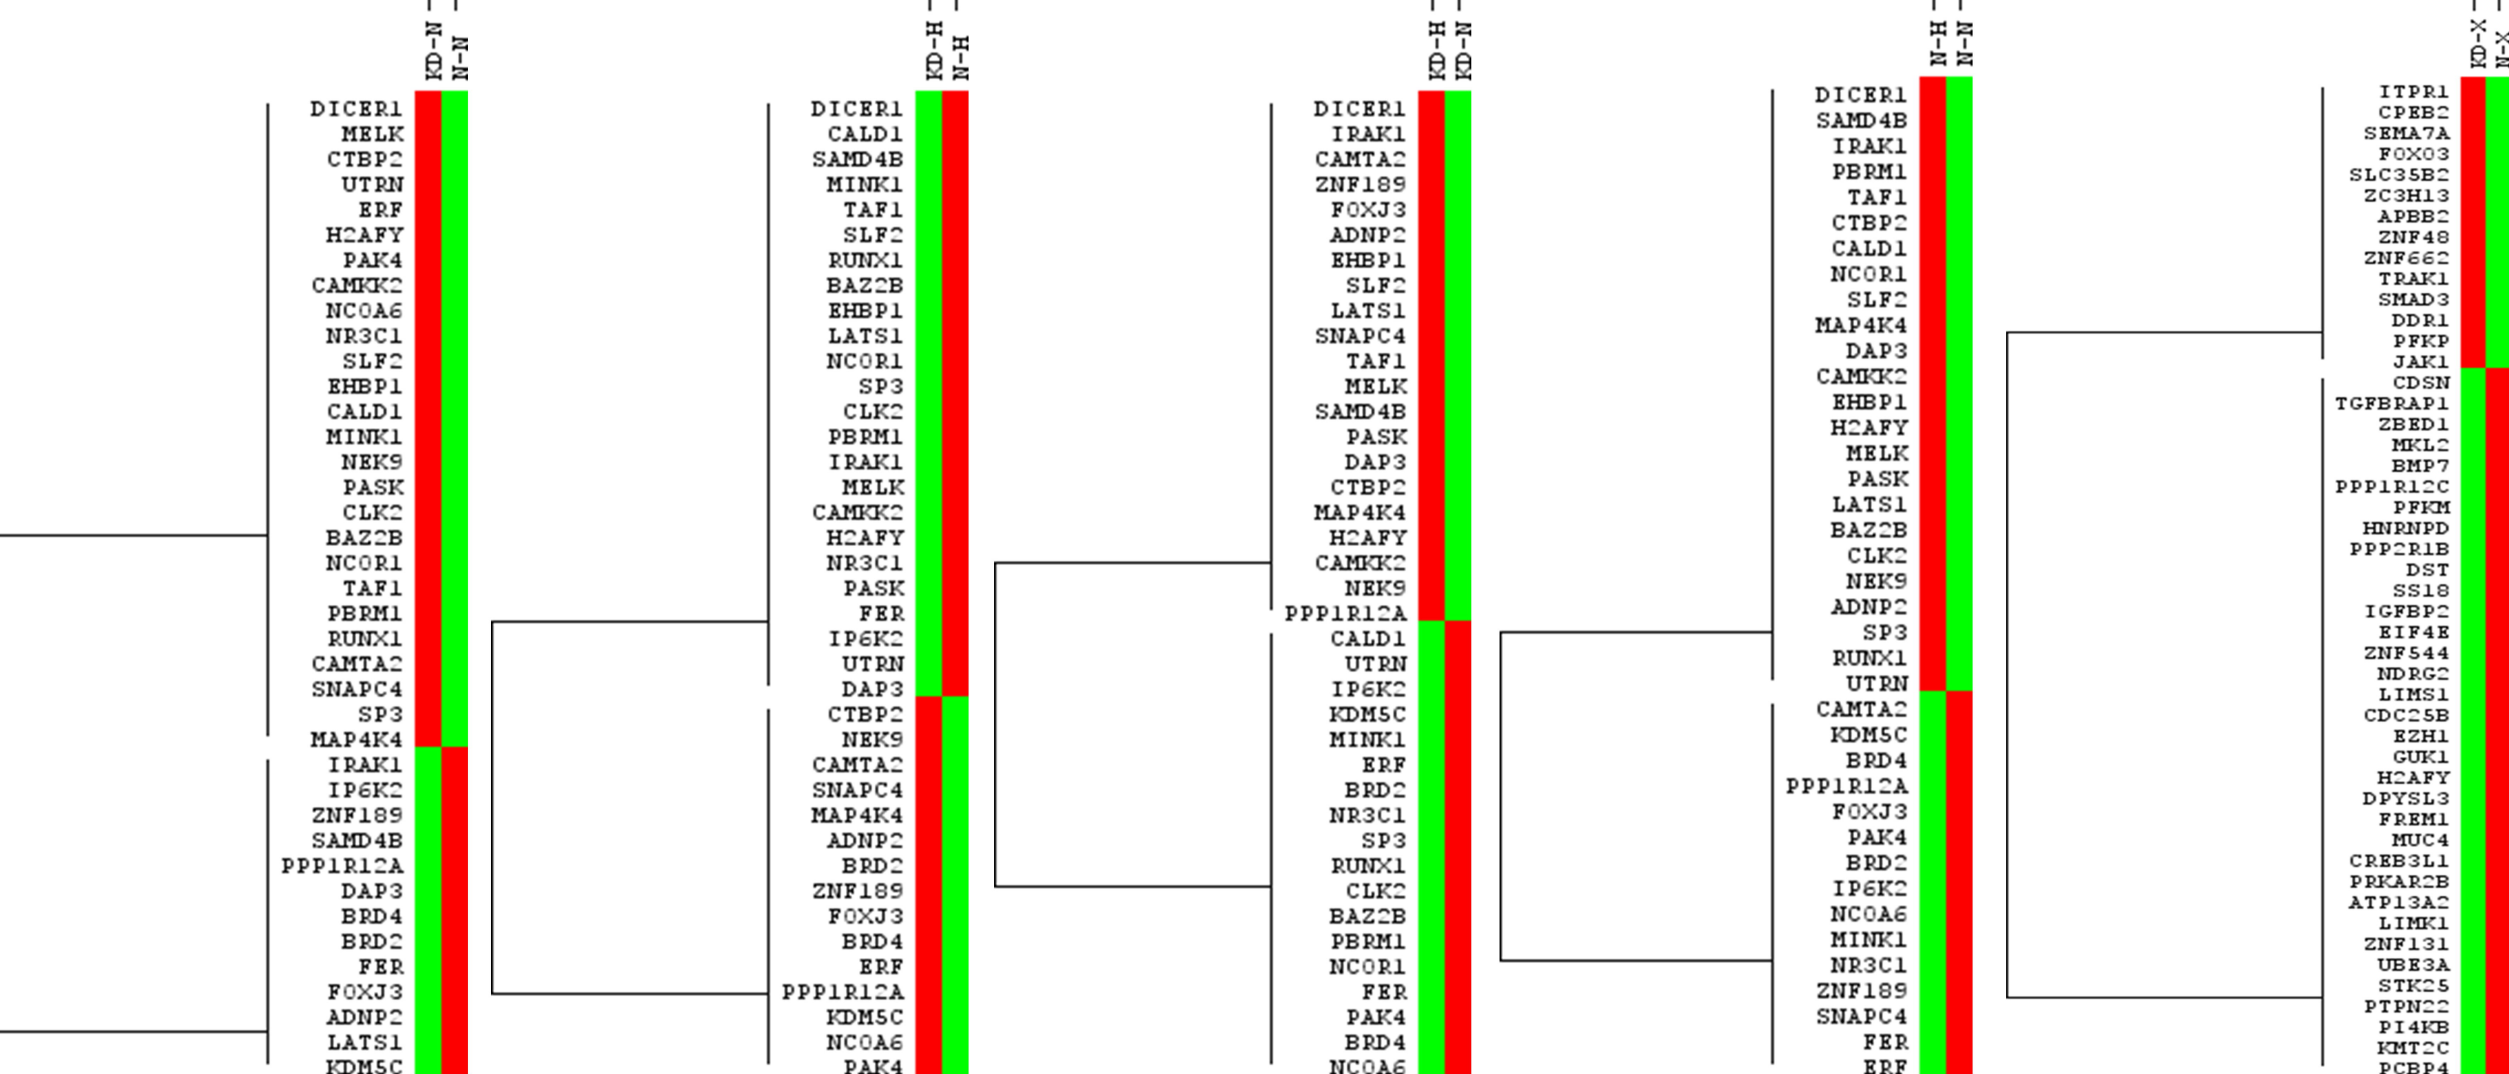

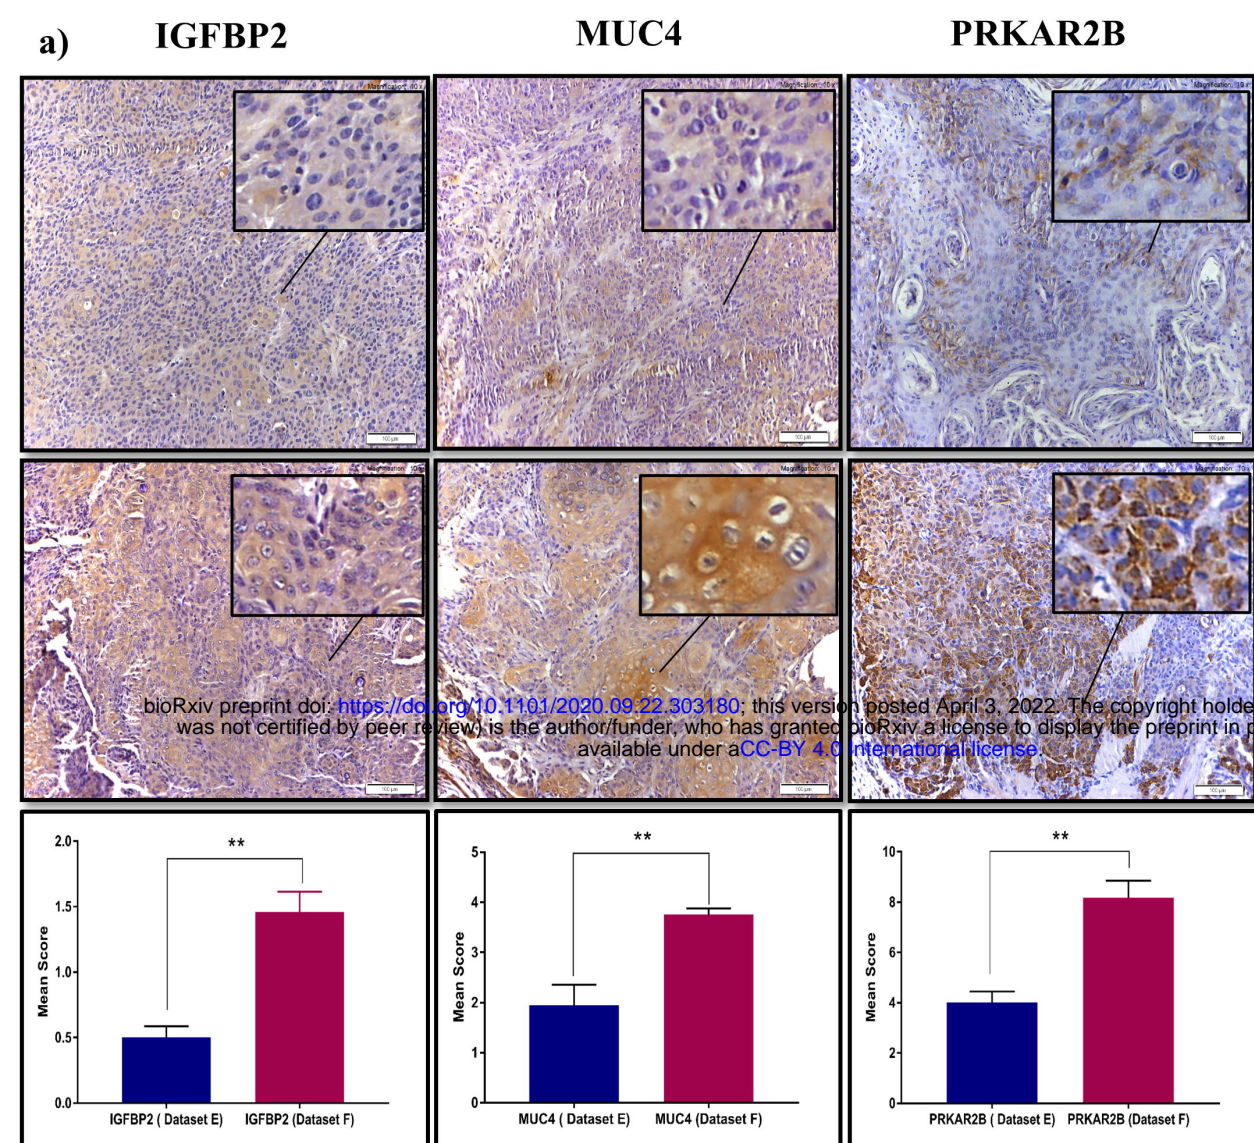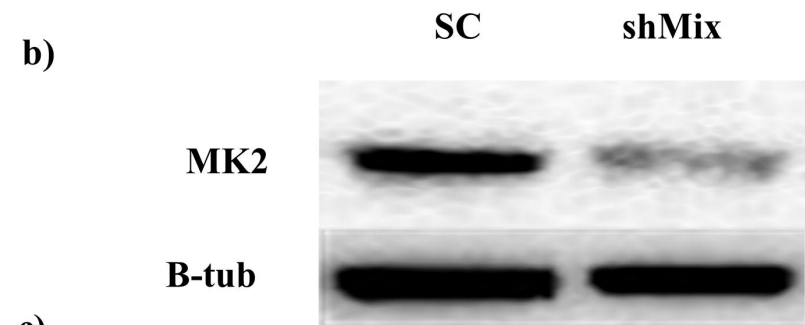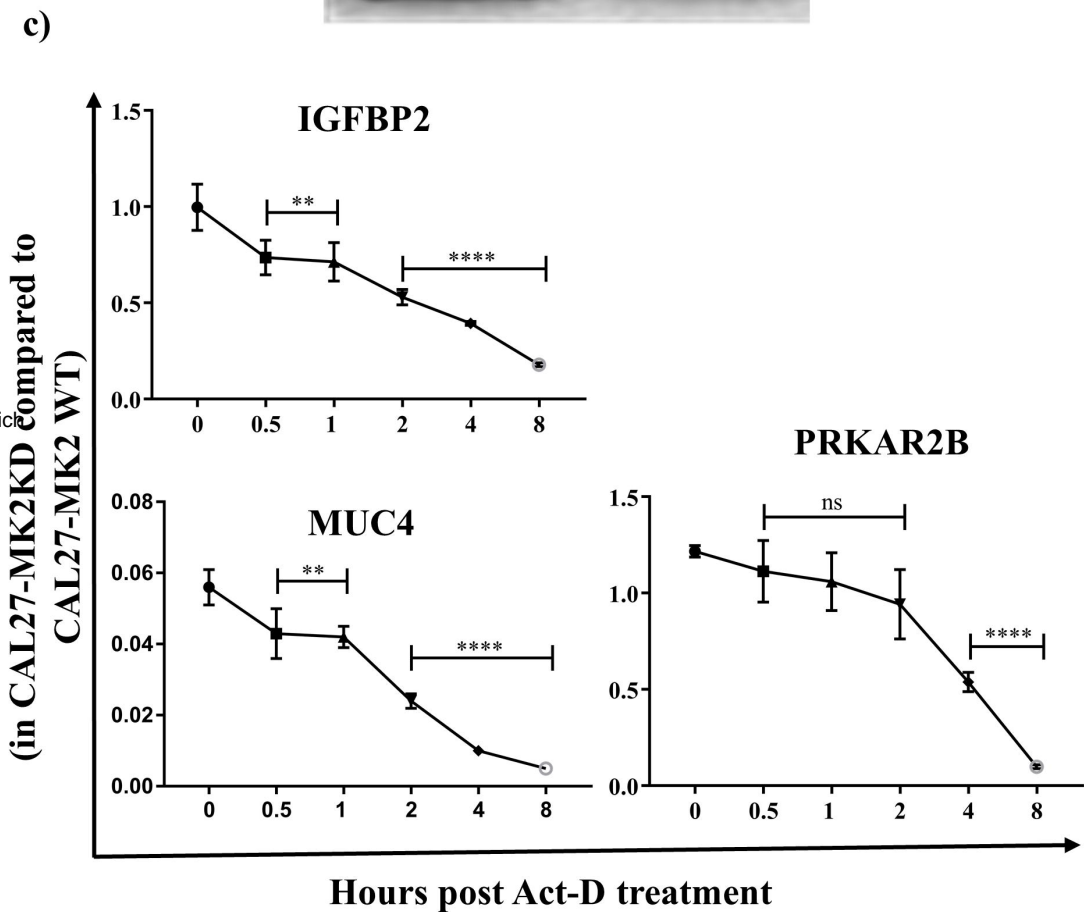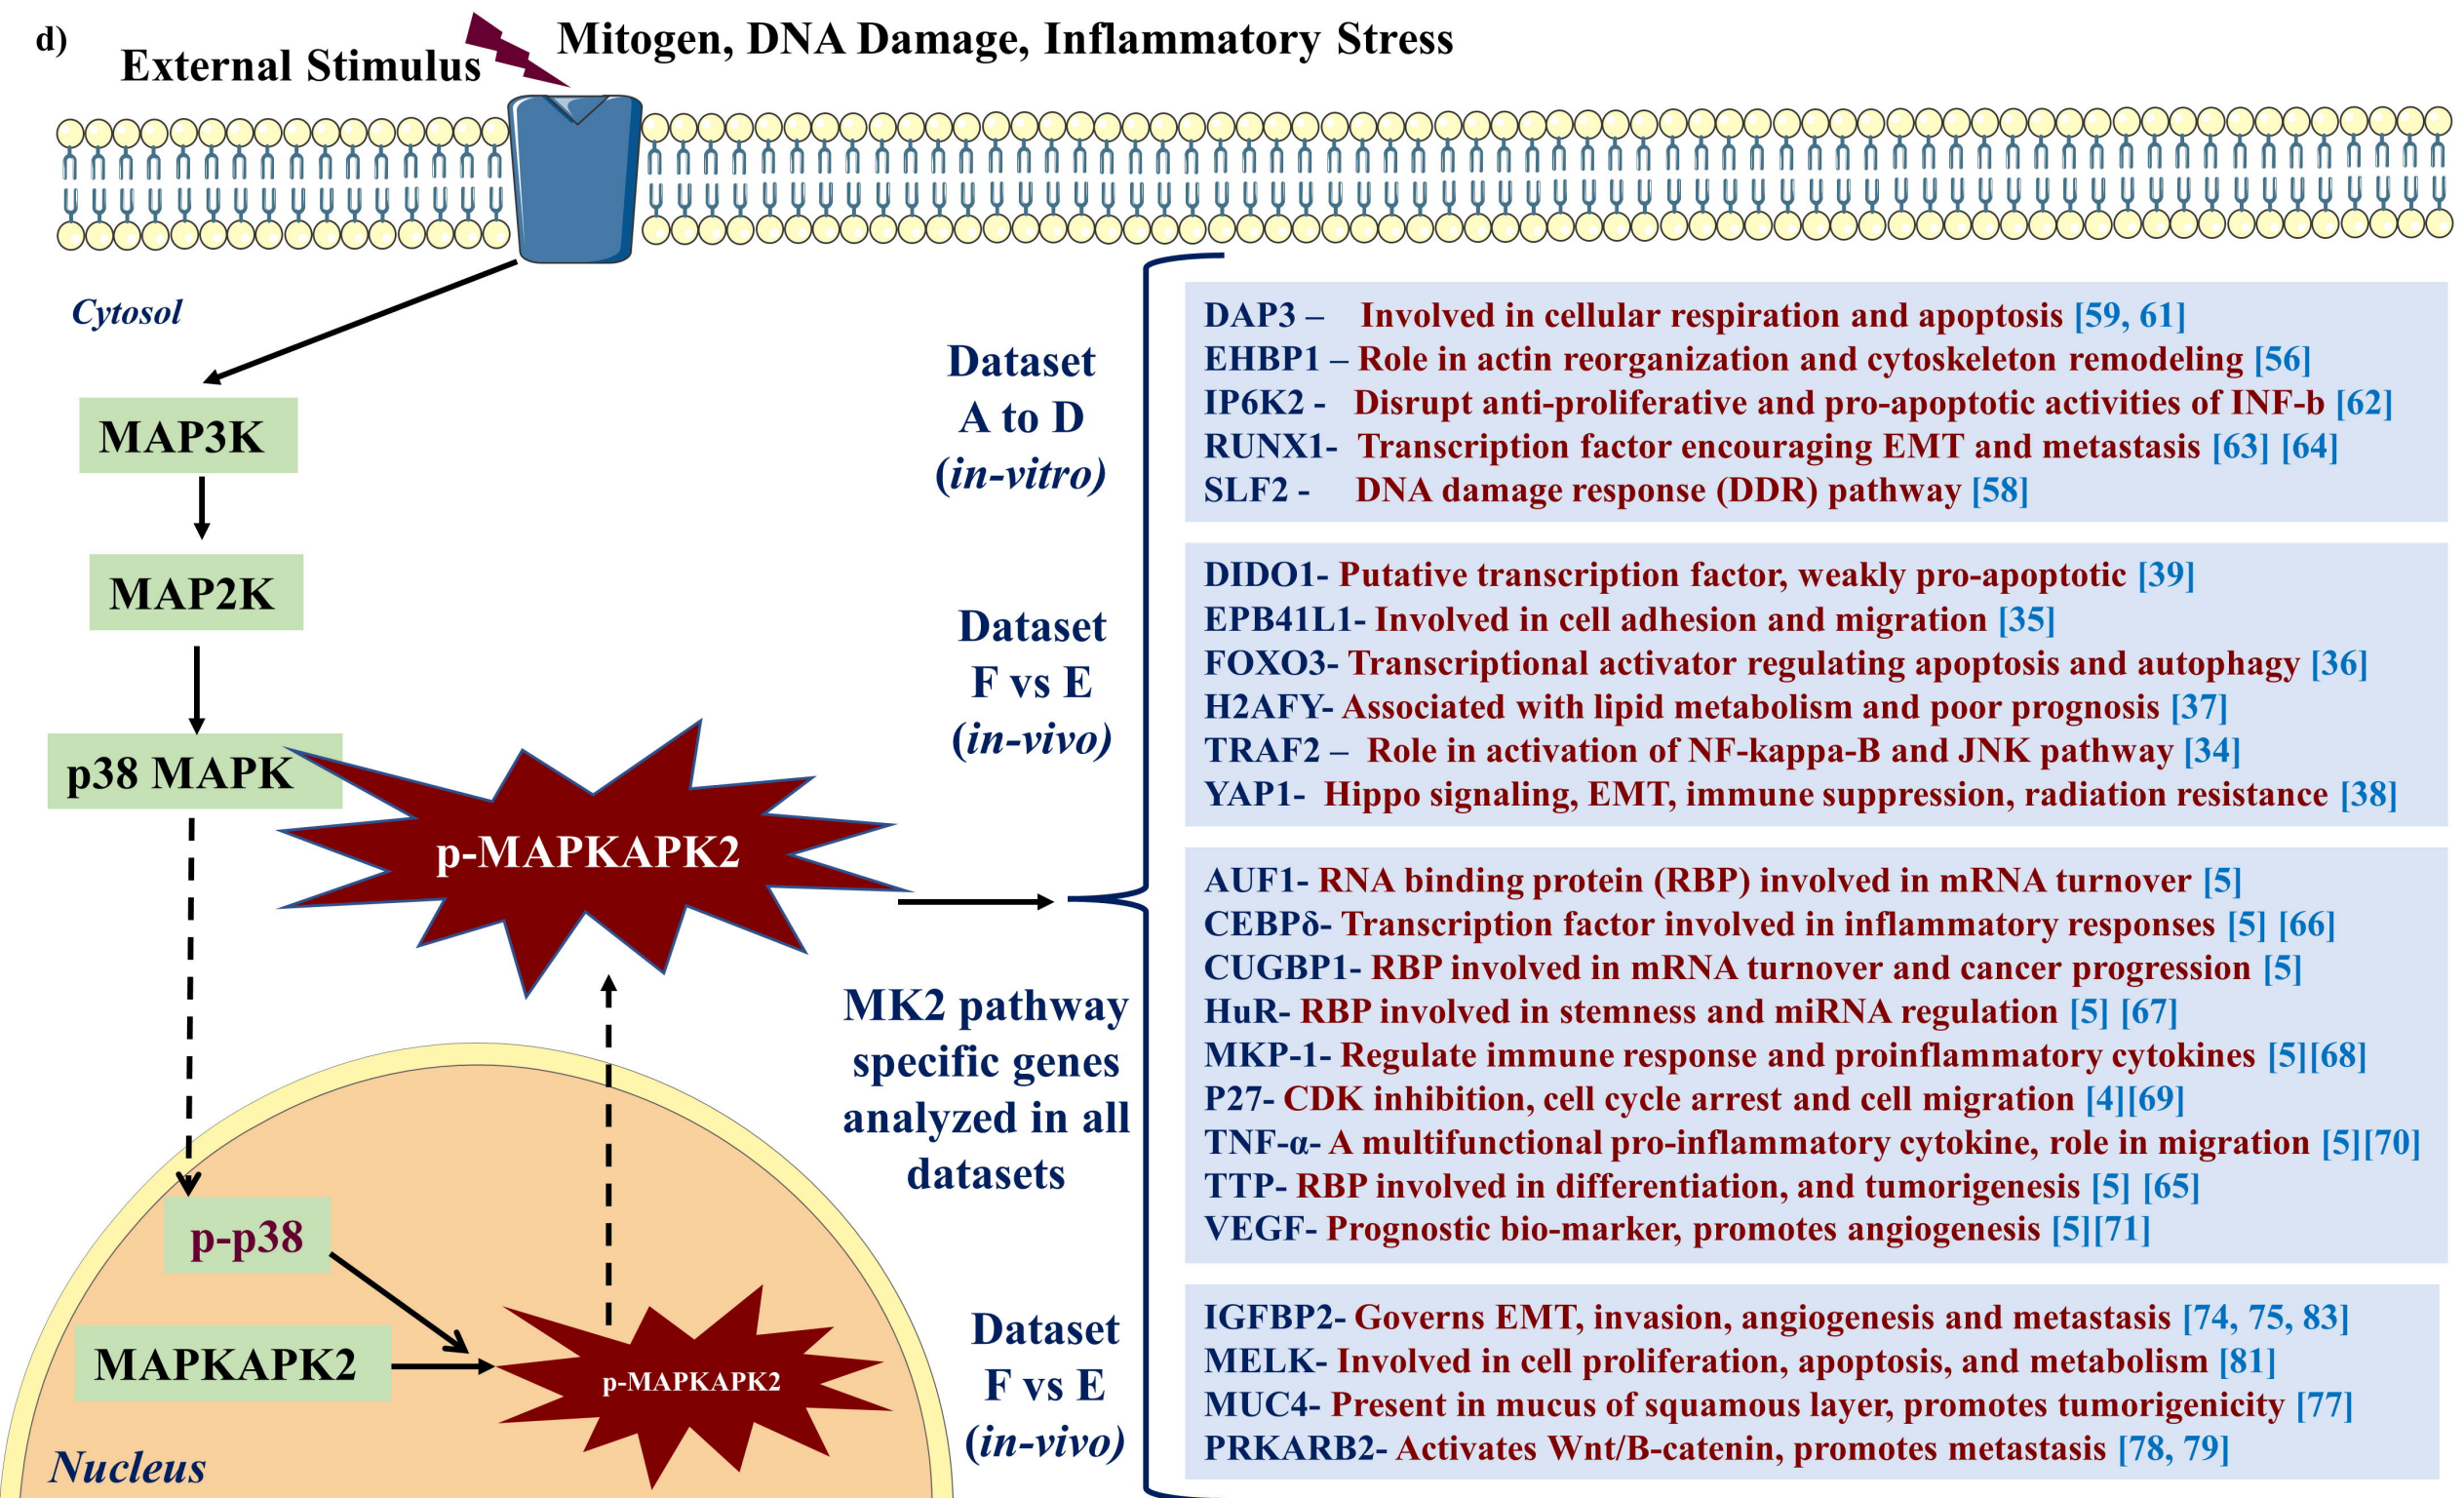

Source: https://www.biorxiv.org/content/10.1101/2020.09.22.303180v2.full.pdf
